# Supplementary material
Source: publisher figshare collection journal article supplement (https://gsajournals.figshare.com/articles/dataset/_/6143183)
Supplement: Supplementary file 1 [file 1]

## Sheet: Table_S1_sleuth_transcript_coun
Table S1. Transcript abundance counts for all samples. F100, F25, or F5 indicates the concentration of the food given to mothers of these eggs as larvae (100%, 25%, 5%). The r1, r2, or r3 indicates replicate number. Values for each sample are in TPM (transcripts per million) counts from analysis using Sleuth. The qval is the FDR corrected p-value from the Sleuth analysis.
transcript_ID	gene_ID	gene_name	F100_r1_TPM	F100_r2_TPM	F100_r3_TPM	F25_r1_TPM	F25_r2_TPM	F25_r3_TPM	F10_r1_TPM	F10_r2_TPM	F10_r3_TPM	F5_r1_TPM	F5_r2_TPM	F5_r3_TPM	qval
FBtr0005088	FBgn0260439	Pp2A-29B	218.087	223.819	216.364	250.07	256.395	241.047	235.168	196.925	212.156	202.585	281.004	262.548	0.432583
FBtr0006151	FBgn0000056	Adhr	0.658511	1.13076	0.828595	1.43316	1.71505	1.01793	1.02012	1.24572	1.12501	1.30912	1.82557	1.12561	0.435845
FBtr0070000	FBgn0031081	Nep3	0	0.02967	0.0285595	0	0	0.0151273	0	0	0.0130121	0.0134191	0.0142876	0	NA
FBtr0070001	FBgn0052826	tRNA:CR32826	0	0	0	0	0	0	0	0	0	0	0	0	NA
FBtr0070002	FBgn0031085	CG9570	0	0	0	0	0	0	0	0	0	0	0	0	NA
FBtr0070003	FBgn0062565	Or19b	0	0	0	0	0	0	0	0	0	0.0231553	0	0	NA
FBtr0070006	FBgn0031089	CG9572	0	0	0	0	0	0	0	0	0	0	0	0	NA
FBtr0070007	FBgn0031092	CG9577	85.154	86.8817	85.175	76.9614	89.4049	84.9809	81.8284	83.8398	86.5865	87.021	78.6863	86.8474	0.459291
FBtr0070008	FBgn0031094	CG9578	80.3527	72.4551	74.165	67.254	71.4393	70.2167	67.9996	73.151	71.9524	80.1308	66.3461	69.5428	0.422682
FBtr0070025	FBgn0000084	AnxB10	74.1522	83.5784	78.299	83.4812	94.0587	88.2952	82.4193	85.4987	85.6764	81.3986	83.362	77.6247	0.603818
FBtr0070026	FBgn0031093	CG9581	45.5744	48.6752	43.124	53.0814	54.5287	55.2438	45.9183	49.868	49.6663	42.2675	56.3414	54.2927	0.446627
FBtr0070027	FBgn0031091	Phf7	116.654	119.263	116.618	104.221	92.8078	82.9654	103.522	102.456	105.455	97.9803	105.552	97.809	0.12671
FBtr0070028	FBgn0031090	Rab35	0.544649	1.11087	0.81848	0.414002	0.084812	0.607202	0.548248	0.583261	0.298155	0.384793	0.244529	0.572705	0.463995
FBtr0070029	FBgn0041626	Or19a	0	0	0	0	0	0	0	0	0	0.0231553	0	0	NA
FBtr0070032	FBgn0031086	fd19B	0	0	0	0	0	0	0	0	0	0	0	0	NA
FBtr0070034	FBgn0053517	Dop2R	0	0	0	0	0	0	0	0	0	0	0	0	NA
FBtr0070035	FBgn0031082	CG17003	0	0	0	0	0	0	0	0	0	0	0	0	NA
FBtr0070036	FBgn0031080	CG12655	0	0	0	0	0	0	0	0	0	0	0	0	NA
FBtr0070038	FBgn0010215	alpha-Cat	109.862	106.447	113.8	149.439	142.745	132.801	104.761	106.209	133.37	130.79	151.278	148.152	0.0400516
FBtr0070040	FBgn0052230	CG32230	56.8368	65.0011	70.862	69.7886	67.072	58.5077	80.7569	41.6081	40.5043	61.8549	48.5349	49.1141	0.44734
FBtr0070041	FBgn0052230	CG32230	365.115	358.947	389.023	380.788	442.346	385.966	408.454	381.274	405.531	399.128	390.894	389.946	0.521895
FBtr0070042	FBgn0264492	CkIIalpha	235.104	233.86	220.046	275.675	293.34	240.328	165.152	219.944	252.414	218.03	241.463	232.599	1
FBtr0070043	FBgn0264492	CkIIalpha	46.9096	38.555	34.7989	44.5574	56.8113	58.2701	50.305	30.96	46.348	40.1513	43.4084	39.31	0.743444
FBtr0070044	FBgn0264492	CkIIalpha	7.78645	20.6109	9.49383	7.41475	23.1441	16.9224	10.5032	18.1776	9.33888	6.51648	6.65465	6.1329	0.591706
FBtr0070045	FBgn0053217	CG33217	13.5422	10.3618	12.5344	20.9029	19.7705	15.5056	10.5615	10.3269	15.7005	12.7107	21.1308	19.4995	0.221554
FBtr0070046	FBgn0052350	CG32350	29.1772	33.993	31.6561	35.032	38.7792	35.5244	29.9973	30.1275	28.3815	27.9996	33.6896	36.3181	0.851777
FBtr0070050	FBgn0052819	CG32819	0.158386	0	0	0	1.89e-08	0.233044	0	0.0375258	0.526529	0	0	0.168091	NA
FBtr0070051	FBgn0052819	CG32819	0.166047	0.333981	0.140148	0.322612	0.220213	0.0746177	0.172326	0.15545	0.222182	0.153376	0.240625	0.213489	0.68988
FBtr0070052	FBgn0052857	CG32857	125.878	111.667	119.739	91.5581	113.642	118.373	106.79	137.017	51.9527	134.763	101.364	93.9824	0.484341
FBtr0070053	FBgn0052820	CG32820	0	0	0.472529	0	0.206595	0.23348	0.640683	0.19624	0	0	0	0.220216	NA
FBtr0070054	FBgn0052820	CG32820	0.166047	0.333981	0.140148	0.322612	0.220213	0.0746177	0.172326	0.15545	0.222182	0.153376	0.240625	0.213489	0.68988
FBtr0070055	FBgn0053502	CG33502	30.6908	28.7462	29.4063	22.9853	29.5567	29.0893	60.8023	31.6833	74.9792	33.2759	23.626	22.7726	0.465396
FBtr0070056	FBgn0040028	CG17450	0	0.148685	0	0	0	0.0170595	0	0.283195	0	0	0	0	NA
FBtr0070057	FBgn0040028	CG17450	0	0	0	0	0	0.0905371	0	0.0564733	0	0.527191	0.265654	0	NA
FBtr0070058	FBgn0027588	CG14476	143.187	152.474	146.153	192.264	171.683	193.943	158.542	139.386	160.53	146.423	236.602	213.784	0.190003
FBtr0070059	FBgn0027588	CG14476	1.41203	3.5431	1.68628	3.3394	3.22728	3.60437	1.38351	1.98971	1.91113	3.25037	3.44292	7.56594	0.276104
FBtr0070060	FBgn0027588	CG14476	1.3139	2.4363	1.88643	3.14294	0.83885	5.06248	0.773612	1.23973	2.13347	1.55663	2.46845	2.1138	0.821927
FBtr0070061	FBgn0027588	CG14476	0.888569	1.79536	2.95603	2.48331	1.40854	2.27893	1.95125	1.45844	1.80766	2.19183	0.927775	2.00961	0.867857
FBtr0070062	FBgn0027588	CG14476	1.80515	3.8073	1.17766	1.70347	0.604388	3.25934	2.23293	1.1305	1.48914	4.13862	2.49895	3.3748	0.862574
FBtr0070063	FBgn0040372	G9a	184.865	199.495	185.205	196.819	183.36	195.752	188.652	190.22	202.266	203.475	223.957	217.103	0.384729
FBtr0070064	FBgn0000316	cin	100.279	99.9568	82.4618	97.2671	104.272	96.3056	97.3703	94.0733	91.5598	100.414	96.9831	96.2606	0.661679
FBtr0070065	FBgn0000316	cin	6.77154	7.45868	21.4325	9.93754	5.55215	14.1964	4.2727	7.95474	9.73416	5.87771	10.6719	16.0679	1
FBtr0070066	FBgn0024989	CG3777	0.0148283	0.0488247	0.0312272	0.0790466	0.0810196	0.0661517	0.0149291	0.0416881	0.0142179	0.1321	0.171247	0.0312233	NA
FBtr0070067	FBgn0024989	CG3777	9.9e-07	4.66e-06	2.24e-06	6.73e-06	8.91e-06	4.71e-06	9.24e-07	1.94e-06	9.63e-07	9.8e-06	8.88e-06	2.06e-06	NA
FBtr0070068	FBgn0024989	CG3777	0	2.22e-10	0	2.84e-10	4.95e-10	1.64e-10	0	0	0	3.56e-10	2.2e-10	0	NA
FBtr0070069	FBgn0040371	CG12470	0	0	0	0	0	0	0	0	0	0	0	0	NA
FBtr0070070	FBgn0029521	Or1a	0	0	0	0	0	0	0	0	0	0	0	0	NA
FBtr0070071	FBgn0004034	y	0	0	0	0	0	0	0	0	0	0	0	0	NA
FBtr0070072	FBgn0000022	ac	0	0	0	0	0	0	0	0	0	0	0	0	NA
FBtr0070073	FBgn0004170	sc	0	0	0.0388062	0	0	0	0	0	0	0	0	0	NA
FBtr0070074	FBgn0002561	l(1)sc	0	0	0	0	0	0	0	0	0	0	0	0	NA
FBtr0070075	FBgn0000137	ase	0	0	0	0	0	0	0	0	0	0	0	0	NA
FBtr0070076	FBgn0029522	CG13373	0	0	0	0.497057	0	0	0.161756	0	0	0.684081	0.190821	0	NA
FBtr0070077	FBgn0052817	CG32817	2.2948	2.60127	2.80671	1.48282	1.36079	3.4605	6.01421	2.03515	5.04474	1.99114	2.40216	3.57052	0.667965
FBtr0070078	FBgn0029524	CG3176	4.48039	4.1637	4.87248	8.61157	3.12442	7.4286	4.00311	4.88871	5.98518	6.66183	6.18546	9.73435	0.500845
FBtr0070079	FBgn0023536	CG3156	38.8732	39.0025	37.8728	37.7448	37.7537	40.5665	43.2557	43.036	41.1877	40.6376	39.0816	36.3949	0.475038
FBtr0070080	FBgn0023534	CG17778	0	0	0.0515724	0	0	0	0	0	0	0	0	0	NA
FBtr0070081	FBgn0004648	svr	0.00576902	0	0	0.00413109	0	0	0	0	0.00143073	0.00196524	0	0.000984965	NA
FBtr0070084	FBgn0004648	svr	0.650658	0	0	0.682957	0	0	0	0.203712	0.837854	0.657968	2.04806	0.866897	0.464708
FBtr0070085	FBgn0004648	svr	2.04481	3.19473	3.51107	4.68197	5.86062	3.15827	1.09373	0.220946	1.00199	3.23143	0.289155	1.74753	0.755312
FBtr0070086	FBgn0004648	svr	0.000347046	9.57e-05	6.2e-05	7.5e-05	2.58e-05	0	5.03e-05	0	3.2e-06	4.02e-05	0	1.91e-06	NA
FBtr0070087	FBgn0004648	svr	0.297857	0.19901	0.254751	0.255722	0.0693472	0	0.179069	0	0.0728453	0.114544	0	0.0621702	0.362159
FBtr0070088	FBgn0023535	arg	0.387187	0.190074	0.547647	0.278278	0.134777	0.529733	0.34753	0.120424	0.0832589	0.128903	0.729533	0.452221	0.67022
FBtr0070089	FBgn0024983	CG4293	17.4427	20.6574	17.7346	17.3323	14.9244	16.3773	15.0021	19.6087	21.7473	18.2073	17.0886	15.7292	0.459868
FBtr0070090	FBgn0024983	CG4293	4.54384	6.26966	5.62842	5.9052	6.812	10.6267	5.57386	2.38413	5.2827	3.95941	7.6643	6.38643	0.757756
FBtr0070091	FBgn0260400	elav	0	0	0.0997509	0	0	0	0	0	0	0	0.0359089	0	NA
FBtr0070092	FBgn0023537	CG17896	112.143	126.127	111.327	102.339	111.056	111.851	125.181	123.423	103.857	101.032	104.023	114.546	0.221554
FBtr0070093	FBgn0023537	CG17896	4.32786	3.68908	4.87591	2.06064	4.02076	3.03042	3.96946	5.20594	1.79837	3.8478	4.14301	3.54371	0.510372
FBtr0070094	FBgn0029525	CG18273	36.7441	39.166	34.5172	38.287	36.318	42.3785	36.1246	36.8959	34.4403	34.0425	39.5069	41.2482	0.533887
FBtr0070095	FBgn0029526	CR18166	0	0	0	0	0	0	0.090791	0	0.295274	0	0	0	NA
FBtr0070097	FBgn0029523	CR18275	0.905795	0.582045	0.503688	0.409386	0.564108	0.620677	0.31893	0.696033	0.614015	0.229293	0.602537	0.321112	0.49594
FBtr0070098	FBgn0266572	ebo	66.9417	72.5573	65.3981	72.6802	74.2559	82.1419	68.6359	64.051	60.4539	56.3748	83.644	76.7569	0.887486
FBtr0070099	FBgn0010019	Cyp4g1	0.0222899	0	0.0234819	0.0713621	0	0.0248648	0	0	0.0427632	0.0441445	0.0234268	0.0469641	NA
FBtr0070100	FBgn0011822	pcl	0	0	0	0	0	0	0	0	0	0	0	0	NA
FBtr0070101	FBgn0052816	CG32816	0	0	0	0	0	0	0	0	0	0	0	0	NA
FBtr0070102	FBgn0052816	CG32816	0	0	0	0	0	0	0	0	0	0	0	0	NA
FBtr0070103	FBgn0040370	CG13375	2.12866	1.1539	1.3853	1.6822	1.19215	3.12099	1.14562	0.471973	0.847779	6.84432	3.30069	4.10607	0.29514
FBtr0070106	FBgn0261446	CG13377	0	0	0	0	0	0	0	0	0	0	0	0	NA
FBtr0070107	FBgn0040373	CG3038	9.16352	10.0299	7.47266	7.34178	11.5478	6.956	9.6318	9.62458	7.12948	6.1381	5.52404	10.5925	0.539969
FBtr0070108	FBgn0040373	CG3038	41.1753	38.0693	36.578	38.5605	33.7465	36.9424	36.2083	37.9926	37.4481	39.1668	38.3085	36.1158	0.460072
FBtr0070109	FBgn0000108	Appl	0.179371	0.00352612	0	0.33815	0.607567	0.259849	0.0479191	0.105349	0.278079	0.0707021	0.440981	0.0724693	0.314073
FBtr0070110	FBgn0261930	vnd	0.0494041	0	0	0	0	0.0183675	0	0	0	0.0163023	0.0345866	0	NA
FBtr0070115	FBgn0025640	CG13369	38.4919	49.843	37.4451	37.5425	39.7036	42.1926	42.2118	45.2589	41.1481	29.0005	40.159	36.0961	0.347804
FBtr0070116	FBgn0025635	CG17829	54.7119	48.828	52.0448	51.6825	64.8122	54.5905	54.6488	46.479	38.8678	46.6289	58.5213	53.0062	1
FBtr0070117	FBgn0025635	CG17829	0.22133	0.811412	0.9083	0.259448	0.287948	1.10116	0.806783	0.953785	0	0.239145	0.263873	0.511012	0.721244
FBtr0070118	FBgn0025635	CG17829	11.9232	19.5374	9.60594	13.2196	7.40976	15.6858	8.34862	14.0335	18.8535	10.6704	11.7238	13.9976	0.727968
FBtr0070119	FBgn0001341	l(1)1Bi	65.5561	62.9941	71.4581	65.666	67.5963	64.7398	73.4628	69.0218	59.202	67.6427	71.4091	70.0165	0.486687
FBtr0070120	FBgn0003575	su(s)	48.9928	52.0502	41.4866	50.5045	50.7	58.5434	45.9253	40.5119	46.112	43.593	64.8907	60.3348	0.452932
FBtr0070121	FBgn0025634	CG13367	80.2017	75.9905	79.0827	75.101	77.461	75.918	83.1765	80.8695	75.9795	81.7238	68.2327	76.6709	0.45775
FBtr0070122	FBgn0025638	Roc1a	332.776	315.22	334.623	298.983	334.662	301.5	318.639	326.774	322.238	343.922	318.487	326.111	0.479371
FBtr0070123	FBgn0025637	SkpA	37.9874	28.2491	41.4123	35.7474	37.5406	37.5054	36.0549	32.6516	38.4013	37.4073	46.5101	35.2916	0.653822
FBtr0070124	FBgn0025637	SkpA	0.255171	0.810439	0.29148	0.443144	0.320262	0.423999	0.296858	0.27953	0.779257	1.01423	0.459434	0.950605	0.656415
FBtr0070125	FBgn0025637	SkpA	142.21	118.759	144.122	109.797	115.437	103.226	129.742	129.343	118.162	123.486	107.975	123.259	0.237547
FBtr0070126	FBgn0025637	SkpA	223.806	236.236	205.906	187.014	222.458	212.776	209.069	216.919	194.869	190.391	194.163	187.609	0.167868
FBtr0070127	FBgn0025637	SkpA	39.3641	45.0422	41.9333	40.5079	40.0387	42.8073	44.1325	41.3573	36.1664	42.7994	42.4614	38.0713	0.485252
FBtr0070128	FBgn0025637	SkpA	13.9221	7.71272	16.138	14.0845	18.5289	13.8925	19.0119	16.1513	19.2783	21.0652	16.1823	19.3299	0.352914
FBtr0070129	FBgn0025637	SkpA	0	0.787926	1.47565	2.03991	0	2.84698	0	1.14219	1.86012	0.624781	0.657851	1.95323	0.70165
FBtr0070130	FBgn0021764	sdk	0.0271253	0.670162	0.0489239	0.0165124	0.0118401	0.889374	0.00983861	0.0180221	0.224438	2.11282	0.0201178	0.457823	0.838636
FBtr0070131	FBgn0021764	sdk	1.87927	2.92239	3.23339	5.17456	4.17262	3.58208	3.69983	1.82685	3.21295	2.56934	8.75269	4.92452	0.311401
FBtr0070132	FBgn0021764	sdk	25.8895	33.4653	31.4727	38.4319	21.7212	38.5025	27.9822	27.8754	18.0593	23.6513	44.4077	42.6537	0.773547
FBtr0070133	FBgn0021764	sdk	0.540536	0.297703	0.532431	0.642266	0.623606	3.91152	1.42e-08	0.490192	0.459205	0.766105	1.27985	0.559779	0.722989
FBtr0070134	FBgn0040383	CG5254	1.67485	2.03662	1.88044	2.29153	2.68288	2.12389	2.09892	1.59452	1.34072	1.39844	2.03234	1.17809	0.634208
FBtr0070135	FBgn0040382	CG5273	25.19	32.1868	21.5382	37.2821	28.5832	33.4276	28.3968	32.8269	32.3994	22.8782	37.0368	34.849	0.480592
FBtr0070136	FBgn0040382	CG5273	19.1184	18.0669	25.0784	11.283	17.9046	12.1965	12.3377	13.4904	15.2455	16.8072	15.9036	18.7545	0.35839
FBtr0070137	FBgn0040382	CG5273	3.27681	2.66896	2.88263	4.23515	4.48103	5.99497	5.99503	3.4217	4.9213	2.99807	11.2221	6.78672	0.233151
FBtr0070138	FBgn0027343	fz3	26.8129	32.7391	29.27	25.8408	30.2809	30.6143	26.5731	34.1511	27.4061	29.7284	31.0074	37.9873	0.780416
FBtr0070139	FBgn0086368	tw	0.0188292	0	0	0.0200854	0	0	0	0	0	0	0	0	NA
FBtr0070140	FBgn0025621	CG16989	39.2428	42.9502	37.7439	37.9472	39.1998	42.414	35.7848	42.5807	36.7763	32.0053	43.4854	44.4974	0.699879
FBtr0070141	FBgn0260855	Sec22	96.6323	109.355	103.015	97.6147	100.185	108.616	107.056	107.445	105.679	99.9618	115.661	111.152	0.481538
FBtr0070142	FBgn0029535	CG14635	0	0.315415	0.460046	0	0.161319	0	0	0	0	0.143789	0	0	NA
FBtr0070145	FBgn0025616	CG13359	0.0861331	0.0629901	0.0302593	0.0306649	0	0	0.0578216	0	0	0	0.060408	0.030263	NA
FBtr0070146	FBgn0015799	Rbf	202.929	216.942	209.87	213.102	203.533	203.831	196.586	202.493	213.356	198.663	235.83	222.894	0.446136
FBtr0070147	FBgn0025620	CG13360	0	0	0.0688031	0	0	0	0	0	0	0	0	0	NA
FBtr0070148	FBgn0015288	RpL22	1484.18	1466.72	1461.52	1376.72	1419.24	1443.91	1239.95	1469.24	1450.61	1249.84	1381.91	1379.6	0.231543
FBtr0070149	FBgn0029532	CG13361	0	0	0	0	0	0	0	0	0	0	0	0.070665	NA
FBtr0070150	FBgn0029531	CG13362	0.0308939	0	0.128716	0.03309	0.169727	0.100087	0.124731	0.0868567	0.0890114	0.0612173	0.0860509	0.0937589	NA
FBtr0070151	FBgn0025639	Hmt4-20	123.05	132.006	136.571	162.965	134.89	169.107	133.125	126.353	136.097	122.504	203.431	181.46	0.352612
FBtr0070155	FBgn0002579	RpL36	1072.97	1183.99	1198.27	992.195	1021.73	1024.35	1120.09	1116.86	1109.09	1143.53	927.511	948.46	0.210964
FBtr0070156	FBgn0002579	RpL36	245.362	254.286	234.943	226.332	289.01	263.236	238.896	211.096	257.266	292.778	208.38	225.965	1
FBtr0070157	FBgn0002579	RpL36	27.41	33.8663	25.8246	35.0751	34.3758	33.0891	23.6166	29.8197	33.9666	41.559	36.7689	35.0527	0.453679
FBtr0070158	FBgn0002579	RpL36	4.66175	9.41793	6.28395	7.25487	11.5354	10.5265	5.52115	5.95941	9.39572	8.59071	5.37221	10.2172	0.605645
FBtr0070159	FBgn0026879	CG13364	505.458	466.851	443.844	389.494	434.011	407.313	427.579	412.65	390.537	418.911	401.32	373.318	0.0926644
FBtr0070160	FBgn0029529	CG13365	71.2256	48.4111	60.7116	64.0491	66.5217	54.9902	64.6706	66.9677	69.7889	82.9677	61.2499	65.118	0.73247
FBtr0070161	FBgn0025633	CG13366	35.3187	25.6594	28.0891	55.8527	39.3009	47.9751	18.5079	12.8081	38.7637	29.9702	50.1792	49.1178	0.260913
FBtr0070163	FBgn0040341	CG11664	0	0	0	0.0694166	0	0.0722536	0.0651753	0	0	0	0	0	NA
FBtr0070164	FBgn0029539	CG11663	0	0	0.206356	0.104971	0.108012	0.108921	0	0.0913676	0	0.0968709	0.414229	0	NA
FBtr0070165	FBgn0040339	MED22	190.656	170.749	202.936	169.554	172.902	172.668	189.989	190.878	188.536	185.996	166.485	168.819	0.309275
FBtr0070167	FBgn0040340	TRAM	5.62431	5.99654	4.5495	4.54187	2.72687	3.98542	4.20852	4.67854	3.91931	2.92262	4.36232	4.23207	0.26847
FBtr0070168	FBgn0040340	TRAM	33.8013	35.2228	44.7381	29.4101	28.487	27.3269	43.9267	47.3157	28.8323	26.8383	31.9386	34.9645	0.190117
FBtr0070169	FBgn0040340	TRAM	5.38851	5.16397	3.6739	4.44285	4.02896	4.9415	5.6916	4.06959	2.28703	5.2057	4.61739	3.21173	0.613367
FBtr0070170	FBgn0040347	mus81	115.701	113.791	112.836	109.139	102.194	100.104	108.307	108.828	115.723	115.566	121.857	110.318	0.471353
FBtr0070171	FBgn0042146	CG18823	0.0912808	0.599269	0.289802	0.294818	0.10107	0.918031	0.643813	0.256726	0.263676	0.453567	0.290751	1.06398	NA
FBtr0070172	FBgn0029552	CG14631	0	0	0	0	0	0	0	0	0.103232	0	0.227924	0.340939	NA
FBtr0070173	FBgn0040337	CG3021	47.7349	43.2432	42.5757	40.1579	41.3277	46.1461	42.3232	43.1543	41.9728	42.3933	41.6976	43.0634	0.411992
FBtr0070174	FBgn0053082	CG33082	0.0805397	0.225128	0.452794	0.235745	0.152517	0.296251	0.113287	0.869207	0.0462778	0.0472263	0	0	NA
FBtr0070175	FBgn0014903	CG14630	0	0	8.5e-05	0.167825	0.189016	0.211636	2.75e-05	0.169289	0.0710254	0.150623	0.0558038	0.156574	NA
FBtr0070176	FBgn0003638	su(w[a])	74.7577	73.6623	79.5957	90.2864	88.9356	102.117	89.5168	77.6096	75.9486	69.9332	101.808	97.2383	0.383298
FBtr0070177	FBgn0003638	su(w[a])	2.60949	1.42539	2.64426	2.33608	1.3881	1.90395	2.42529	1.48757	2.32212	1.89951	2.43225	3.54532	1
FBtr0070178	FBgn0003638	su(w[a])	0.258241	0.624819	0.419734	0.31053	0.445053	0.507369	0.650102	0.564659	0.227809	0.272696	0.391274	0.285765	0.724436
FBtr0070179	FBgn0040398	CG14629	0.197916	0.108462	0.156656	0.317915	0.217584	0.110471	0.199343	0.278256	0.0950783	0.0490651	0.365477	0.208981	NA
FBtr0070180	FBgn0040365	CG14628	0.138538	0	0	0	0.154627	0.310101	0.13946	0.909472	0	0.137926	0.148023	0.147335	NA
FBtr0070181	FBgn0040397	CG3655	0	0	0.0187019	0.0353037	0.0182938	0.0379253	0.0357386	0.016699	0	0	0.0357347	0.0173686	NA
FBtr0070182	FBgn0026143	CDC45L	188.269	204.782	211.039	199.366	186.61	186.761	195.33	201.903	197.566	189.671	209.13	192.683	0.395148
FBtr0070183	FBgn0040351	CG11638	2.39953	2.7994	0.548611	1.4971	1.55896	1.244	0.722519	1.0942	1.25202	2.47532	2.23352	2.2186	0.76753
FBtr0070184	FBgn0040338	TfIIA-S-2	0	0	0.159634	0	0.336006	0	0	0.14097	0	0	0.321546	0.319844	NA
FBtr0070185	FBgn0040350	CG3690	0.0246729	0.0270698	0	0	0	0	0	0.0231224	0	0	0	0	NA
FBtr0070186	FBgn0040349	CG3699	0	0	0	0	0.0756813	0	0	0	0.264013	0.0681124	0.145225	0.145145	NA
FBtr0070187	FBgn0040348	CG3703	0.264011	0.215006	0.139321	0.0948699	0.166965	0.0736591	0.19992	0.285902	0.190248	0.239759	0.229557	0.16345	0.642302
FBtr0070188	FBgn0040346	CG3704	85.9937	90.0811	87.8104	77.7349	78.759	81.1939	90.2353	90.847	82.0168	81.561	79.3548	75.0481	0.162989
FBtr0070189	FBgn0040342	CG3706	0.033986	0.0745472	0	0.10897	0.0372634	0.0758483	0.136899	0.127408	0.0652474	0.303072	0.107343	0.143357	NA
FBtr0070195	FBgn0040343	CG3713	0	0.0619533	0	0	0	0	0	0	0	0	0	0	NA
FBtr0070197	FBgn0040364	CG11378	0.0451553	0	0	0.0483291	0	0.0504029	0	0	0.000290743	0.223837	0.00050206	0.0476623	NA
FBtr0070198	FBgn0040362	CG11379	0	0	0	0	0	0	0	0	0	0	0	0	NA
FBtr0070199	FBgn0040361	CG14627	0.0370304	0.0406074	0	0	0	0	0	0	0	0	0	0	NA
FBtr0070200	FBgn0040360	CG14626	0	0	0	0	0	0	0	0	0.0360306	0	0	0	NA
FBtr0070201	FBgn0040359	CG11380	0	0	0	0	0.0203244	0	0	0.0174176	0	0.0368025	0	0	NA
FBtr0070202	FBgn0040358	CG14625	0	0	0	0.0416936	0	0	0	0	0	0.0193477	0	0.0205816	NA
FBtr0070203	FBgn0029568	CG11381	0	0	0.0344016	0	0	0	0.0328615	0	0.0313224	0	0	0.0344083	NA
FBtr0070204	FBgn0040357	CG14624	0	0	0	0	0	0.0789246	0.142373	0.13247	0	0.0701446	0.0747933	0	NA
FBtr0070205	FBgn0040367	CG11382	1.01872	2.61054	0	0.72273	0	1.51429	1.02545	0.636379	0.975924	0	0	0	NA
FBtr0070206	FBgn0025642	CG32812	0	0	0	0	0	0	0	0	0	0	0.0688893	0.0807576	NA
FBtr0070207	FBgn0004650	fs(1)N	107.214	121.151	111.982	117.609	108.258	127.814	112.134	107.646	112.017	98.3659	148.767	137.021	0.670298
FBtr0070209	FBgn0024362	CG11412	91.5492	102.738	102.147	87.4924	91.5025	96.6216	97.5067	96.6951	92.965	95.2267	105.24	107.704	0.49552
FBtr0070211	FBgn0024361	Tsp2A	0.0555497	0	0.351893	0.119065	0	0.186068	0	0.156203	0.0778094	0.220409	0.234677	0.11737	NA
FBtr0070212	FBgn0024364	CG11417	108.587	112.414	124.055	111.384	107.162	116.06	111.752	116.047	95.1454	87.7631	112.11	118.382	0.389406
FBtr0070213	FBgn0029573	CG14770	0	0	0	0	0.0967308	0	0	0	0.0841813	0	0	0.277812	NA
FBtr0070215	FBgn0024987	ssx	122.7	114.698	99.8975	120.059	120.339	120.665	115.49	105.913	99.5237	111.489	129.997	136.156	0.44734
FBtr0070216	FBgn0023169	AMPKalpha	67.403	71.5462	67.208	87.8651	85.1208	88.4007	72.5524	68.4102	74.4685	62.734	101.048	94.0542	0.326495
FBtr0070217	FBgn0023169	AMPKalpha	5.1179	3.98632	5.0652	7.59997	6.53513	5.76522	5.62096	4.21247	5.00733	5.32212	8.16823	9.65564	0.182469
FBtr0070218	FBgn0023169	AMPKalpha	0.484493	0	0.473033	0.243099	0	1.75686	0	0.348454	0.288504	0.496396	1.56774	0.278226	0.656086
FBtr0070219	FBgn0052813	CG32813	0	0.466456	0.775294	0	0.486562	0.248827	0.449336	0	0	0.220759	1.06131	0.648632	0.790889
FBtr0070222	FBgn0052813	CG32813	0	0	0	0	0	0	0	0	0	0	0	0.0936395	NA
FBtr0070225	FBgn0024985	CG11448	44.5365	50.4711	49.9409	43.0435	45.2474	44.3386	48.0346	48.7705	44.4887	43.9172	43.9718	47.1397	0.26708
FBtr0070230	FBgn0027794	CG14786	15.3383	15.6741	13.7372	15.6325	17.7248	17.844	16.3151	16.3562	16.8338	13.8737	19.5732	19.5667	0.392545
FBtr0070231	FBgn0027795	CG14785	0.78889	1.76394	0.735575	0.518616	0.997407	0.643234	1.31381	1.25118	0.902702	0.871689	1.43673	1.37542	0.673373
FBtr0070233	FBgn0024986	CG3719	80.528	71.6169	76.9553	61.4125	71.7517	67.5365	76.3023	75.4207	71.9194	78.1451	62.5224	74.6734	0.406166
FBtr0070234	FBgn0000826	png	186.513	192.208	189.163	153.908	177.928	175.309	180.287	196.362	172.826	167.073	138.958	120.951	0.183466
FBtr0070235	FBgn0024365	CG12773	46.4985	55.6705	47.6799	47.1982	44.3936	49.954	47.2542	44.4386	43.0402	41.9399	64.8246	59.0846	1
FBtr0070236	FBgn0024360	CG11418	49.2748	44.2342	43.7009	46.7936	48.3813	46.0234	46.6033	50.5753	47.2219	42.6376	45.5595	50.1769	0.504726
FBtr0070237	FBgn0024360	CG11418	0	1.50746	0	0	0	0.375744	1.03593	0.377509	0	0	0	0.409783	NA
FBtr0070238	FBgn0024366	CG11409	5.42e-09	7.15e-09	3.86e-09	0	1.26e-08	6.82e-09	1.95e-09	1.37e-09	2.2e-09	3.66e-09	0	3.3e-09	NA
FBtr0070239	FBgn0025641	DAAM	72.2673	71.9253	62.7295	82.6846	72.8004	82.8049	66.7949	55.6586	54.204	53.266	101.636	84.7967	0.652546
FBtr0070241	FBgn0025641	DAAM	0	0	0.267358	0.137483	0.151468	0	0.255071	0.675984	0.27997	0.127893	0.439046	0	0.648296
FBtr0070244	FBgn0028550	Atf3	0.614986	0.967329	0.406598	0.364645	0.607151	0.897912	0.293785	0.407478	0.584671	0.421232	0.77189	0.589072	0.741628
FBtr0070245	FBgn0026876	CG11403	71.8348	69.2532	66.8567	67.0223	64.1205	68.0056	65.6085	67.4477	61.7097	64.7859	76.0446	74.0215	0.463709
FBtr0070249	FBgn0261444	CG3638	0.0374045	0.038817	0	0	0.0348297	0	0.0339786	0	0.0456252	0	4.91e-05	0	NA
FBtr0070250	FBgn0040366	CG11398	49.3581	47.9199	49.2297	41.9287	50.5376	43.0581	44.1849	53.802	50.9052	51.1609	41.5674	46.4141	0.459434
FBtr0070251	FBgn0040363	CG11384	0	0	0	0	0	0	0	0	0	0	0	0	NA
FBtr0070252	FBgn0040368	eIF4E-7	0.0318673	0	0.0335927	0.0680993	0.0349276	0.0355579	0	0	0	0	0.13416	0	NA
FBtr0070253	FBgn0026872	CG14777	1.6891	0.863643	1.16302	1.23631	1.30905	3.15348	1.70087	3.03216	1.11424	1.41923	1.96643	0.0135195	0.78983
FBtr0070254	FBgn0029580	CG14778	0.470064	0.514608	0.248518	0	0.432761	0.43759	0.587717	0.146884	0.339378	0	0.33209	0.385206	NA
FBtr0070255	FBgn0013720	pck	0	0	0	0	0	0	0	0	0	0	0	0	NA
FBtr0070256	FBgn0013720	pck	62.066	63.0453	69.1982	63.0161	64.4649	65.6043	62.8846	65.878	60.5237	57.6868	67.9515	62.8146	0.437199
FBtr0070257	FBgn0025383	CG14780	0	0	0	0.0544105	0	0.113426	0.25584	0	0.048813	0	0.0536163	0	NA
FBtr0070258	FBgn0260986	mei-38	211.203	206.282	205.9	194.998	196.71	196.009	198.121	194.313	201.406	207.952	197.345	188.884	0.341644
FBtr0070259	FBgn0025381	rush	78.3131	84.4266	85.2982	84.0697	78.3208	83.0412	84.3871	87.1266	85.6219	75.9247	95.463	99.7052	0.585469
FBtr0070260	FBgn0025394	inc	0	0	0	0	0	0	2.4e-07	0	0	0	0	0	NA
FBtr0070261	FBgn0000210	br	0	0	0.026284	0.0793323	0.0989105	0	0	0	0.0506363	0	0	0.0781331	NA
FBtr0070262	FBgn0000210	br	0	0	0	0	0	0	0	0	0	0	0	0	NA
FBtr0070263	FBgn0000210	br	0	0	0	0	0	0	0	0	0	0	0	0	NA
FBtr0070265	FBgn0000210	br	0	0	0	0	0	0.0764896	0.063197	0.0571237	0.159187	0.0609698	0.0942022	2.38e-06	NA
FBtr0070266	FBgn0000210	br	3.29e-05	0	0	0	0	0	1.54e-05	0	0	0	0	0	NA
FBtr0070269	FBgn0000482	dor	26.3813	25.1471	21.1548	23.1197	24.7842	26.9614	25.5446	24.7074	25.4932	22.3998	29.3231	27.9597	0.624054
FBtr0070270	FBgn0001189	hfw	29.5153	33.0955	31.5966	29.8129	28.8273	32.5876	33.6277	33.0167	29.5257	29.3946	36.4765	34.2098	0.501347
FBtr0070272	FBgn0024897	b6	0	0	0.0251342	0	0	0	0.0240203	0	0	0.0472496	0	0	NA
FBtr0070277	FBgn0025391	Scgdelta	0.118683	0.338926	0.725246	1.14637	1.50682	0.743578	0.717869	0.535564	1.55461	2.71142	2.32686	1.98983	0.064374
FBtr0070278	FBgn0025378	CG3795	0	0	0	0	0	0	0	0	0	0	0	0	NA
FBtr0070279	FBgn0023130	a6	39.9288	39.6318	48.1695	37.9483	37.0996	41.9648	40.781	45.9224	35.0057	32.0881	45.2036	41.4753	0.420992
FBtr0070283	FBgn0023530	CG3740	73.3837	69.224	68.5733	68.9943	70.4284	70.2232	76.2368	74.0753	69.1841	70.2194	65.3601	72.7478	0.455574
FBtr0070284	FBgn0025390	Mur2B	0.48169	0.377311	0.590275	0.386896	0.288385	0.650647	0.109067	0.454674	0.367346	0.402311	0.530104	0.548481	0.666368
FBtr0070285	FBgn0025393	CG14795	0	0	0	0	0	0	0	0	0.185375	0	0	0	NA
FBtr0070288	FBgn0053513	Nmdar2	0	0	0	0	0	0	0	0	0	0	0	0	NA
FBtr0070289	FBgn0003517	sta	6.33242	14.2466	10.1533	10.2788	12.1586	13.4099	7.99836	7.31648	11.4166	9.21857	16.2006	15.5179	0.484004
FBtr0070290	FBgn0003517	sta	911.026	713.403	1726.09	2469.19	2769.17	2506.31	2443.76	1097.6	3010.69	2849.93	2826.22	2502.93	0.0491594
FBtr0070292	FBgn0044508	snoRNA:M	0	0	0	0	0	0	0	0	2.57753	0	0	0	NA
FBtr0070293	FBgn0025382	Rab27	0	0.272567	0	0	0	0.268357	0	0	0	0	0	0	NA
FBtr0070294	FBgn0025382	Rab27	24.9803	27.7686	29.4465	13.0079	17.7189	24.9308	26.8776	24.1658	29.7074	18.5382	25.6625	18.0677	0.254052
FBtr0070295	FBgn0052808	CG32808	0.0518537	0.113657	0	0	0.0570301	0.173671	0.261145	0.0486023	0	0.154278	0.164208	0.109527	NA
FBtr0070296	FBgn0027791	O-fut2	39.9413	46.4721	38.0284	39.1604	45.1433	43.9965	40.7677	40.1279	47.2908	39.1596	51.522	49.7257	0.512285
FBtr0070297	FBgn0266284	Ns3	96.7012	92.8384	96.786	94.7284	96.5761	97.9686	104.948	117.538	92.0422	84.8982	80.9053	93.0971	0.366067
FBtr0070298	FBgn0027793	CG14787	0.985203	0.503587	0.971471	0.916245	1.08616	1.32037	1.191	1.16976	1.20014	0.782224	1.31997	1.1806	0.601529
FBtr0070299	FBgn0026086	Adar	0	3.83e-10	0	1.17e-05	0	2.81e-09	0	0	0	0	0	2.29642	NA
FBtr0070300	FBgn0026086	Adar	0	0	0	0	0	0	0	0	0	0	0	0	NA
FBtr0070301	FBgn0052806	CG32806	0	0	0.229509	0	0	0	0	0	0	0	0	0	NA
FBtr0070308	FBgn0026873	MED18	72.1162	61.9575	68.4759	69.6742	76.4061	70.5876	72.6859	68.9122	78.5697	84.9594	68.8982	66.3871	0.759132
FBtr0070310	FBgn0023513	CG14803	52.7002	57.8921	50.4276	61.0385	55.8647	61.9909	53.8736	50.0195	55.3317	52.6028	68.4393	62.2432	0.373651
FBtr0070311	FBgn0014411	Vps26	112.121	121.894	106.912	109.906	109.555	112.426	108.902	105.202	102.908	109.31	122.966	118.223	0.457143
FBtr0070312	FBgn0023514	CG14805	126.891	121.732	128.827	122.777	127.206	127.892	130.112	132.076	125.704	125.736	117.725	129.942	0.459291
FBtr0070313	FBgn0029594	CG14806	5.34587	2.09682	4.61932	5.07943	3.53891	2.55487	3.65251	3.22023	3.47518	4.9099	5.40025	4.81821	0.660055
FBtr0070314	FBgn0023519	mRpL16	91.343	87.707	87.1619	81.8194	96.3525	80.9437	91.6316	87.9023	91.7226	98.3838	86.5646	86.8882	0.584155
FBtr0070315	FBgn0023509	mip130	67.6759	66.942	64.2323	73.5121	69.5452	76.9026	69.5079	64.0249	63.6776	55.9219	79.0292	71.4901	1
FBtr0070316	FBgn0023510	Rbcn-3B	27.9368	34.5295	29.644	37.7892	32.3077	38.8133	28.2756	28.1781	33.2722	25.7098	49.3146	42.6578	0.463995
FBtr0070317	FBgn0023508	Ocrl	69.0723	72.7192	72.0374	67.1551	66.5927	70.9256	65.7563	71.4448	65.5155	54.6428	70.1838	69.293	0.241509
FBtr0070318	FBgn0023522	CG11596	62.8525	83.9009	84.1639	76.154	76.7577	77.4057	80.87	80.5968	72.9028	76.13	76.6194	73.9724	0.751598
FBtr0070319	FBgn0023522	CG11596	40.1481	38.616	32.903	26.948	31.4324	37.3149	30.8989	36.3567	29.4376	26.5459	31.0326	28.8907	0.153495
FBtr0070320	FBgn0023522	CG11596	0.364009	0	0	1.2368	0.408156	0.759199	0.375759	0	0	0	0	0	NA
FBtr0070321	FBgn0023521	CG3587	62.8703	58.4742	62.3748	53.2564	55.3281	58.2292	59.6781	66.8742	57.738	54.3303	54.9891	52.1975	0.219293
FBtr0070326	FBgn0261954	east	81.1876	79.3415	78.1277	74.6884	72.3581	91.1135	77.0854	67.837	66.1621	71.2376	99.6978	89.6498	1
FBtr0070328	FBgn0025627	CG4194	0.699993	1.09601	1.00262	0.535467	0.71465	0.61399	1.51081	1.45278	0.960813	0.743737	1.00252	1.10874	0.623856
FBtr0070330	FBgn0025630	CG4061	12.1299	4.28766	11.7744	4.90904	4.92233	3.2364	2.76837	2.1971	9.31086	1.28694	4.26917	5.54063	0.475619
FBtr0070331	FBgn0025629	CG4045	48.9592	55.8483	50.1585	46.3377	49.4844	54.9459	53.1413	53.1769	46.425	49.0486	38.4903	47.931	0.40121
FBtr0070334	FBgn0025628	CG4199	2.61497	5.18218	2.43346	4.88722	4.42005	3.70622	4.88321	5.04742	3.95238	1.4828	3.95136	5.05257	0.863454
FBtr0070335	FBgn0025628	CG4199	0.216132	0	0.213159	0.191482	0.696539	1.04474	0.680785	0.425929	0.647885	0.494741	0.652912	0.455472	0.414801
FBtr0070336	FBgn0025628	CG4199	0.730804	0.33901	0	0.575591	0	0.334068	0.514089	0	0	0.0902736	0	0	NA
FBtr0070337	FBgn0025628	CG4199	80.854	82.3549	81.7303	89.9014	90.1001	94.6948	81.375	94.38	84.7868	78.3193	89.7998	75.4228	1
FBtr0070338	FBgn0029596	CG14054	1.39154	0.885488	1.15807	0.302125	1.04414	0.617001	1.16518	0.848043	0.393368	0.94499	0.816713	0.422757	0.523166
FBtr0070339	FBgn0025626	CG4281	147.276	154.224	146.665	141.432	141.462	145.235	144.842	143.324	135.379	126.427	154.77	148.168	0.330245
FBtr0070340	FBgn0025625	Sik2	0.0561076	0.0619014	0.029529	0.0199264	0.0510478	0.0208558	0.0942946	0.0175257	0.0806705	0.0277613	0.145121	0.0787256	0.6717
FBtr0070341	FBgn0025631	moody	0	0	0	0.0142717	0.0230384	0	0	0	0	3.05e-08	0	0	NA
FBtr0070342	FBgn0026878	CG4325	0.108823	0	0	0	0.120859	0.243348	0	0.204083	0	0	0	0	NA
FBtr0070343	FBgn0000667	Actn	0	0	0	0	0	0	0	0	0	0	3.57e-10	0	NA
FBtr0070344	FBgn0000667	Actn	110.992	118.741	119.752	117.375	105.286	116.396	108.501	115.435	111.78	94.0621	121.755	115.342	0.386695
FBtr0070345	FBgn0000667	Actn	0.778764	1.60264	1.19315	1.41816	1.02461	1.11769	1.79079	1.12866	1.47428	0.841015	0.825572	1.51251	0.681595
FBtr0070346	FBgn0003964	usp	151.229	166.989	151.797	144.025	144.773	152.555	134.178	151.914	152.157	128.856	162.017	156.348	0.321814
FBtr0070347	FBgn0023545	CG4406	76.9684	74.2173	77.5513	70.4845	77.0894	80.7909	79.9203	80.6562	77.215	76.8863	75.6618	74.5455	0.459209
FBtr0070349	FBgn0023520	CG3857	16.0069	18.2295	15.516	15.7403	16.1386	16.8892	17.5563	15.5691	16.9747	16.7295	16.8218	16.132	0.467922
FBtr0070350	FBgn0023512	eIF2B-epsilon	50.4304	44.6748	44.4873	43.0415	46.7643	50.1532	45.623	49.4918	46.234	41.4728	46.5012	43.1622	0.444256
FBtr0070351	FBgn0023512	eIF2B-epsilon	1.9103	5.91722	4.66752	10.4555	6.56388	7.42001	3.82834	3.26675	6.07242	4.09661	4.99999	9.99779	0.429625
FBtr0070352	FBgn0023511	Edem1	0.252024	0.13988	0.737303	0.622891	0.411822	0.407501	0.543264	0.366948	0.422446	0.674038	0.571578	0.497401	0.623189
FBtr0070353	FBgn0023511	Edem1	17.0819	19.1807	16.4501	14.9288	13.4228	17.8106	17.4365	17.7674	15.6302	15.5064	20.4789	15.7003	0.498032
FBtr0070354	FBgn0023511	Edem1	4.18262	3.41641	4.95983	8.71373	4.94101	5.37687	6.41258	3.62114	4.55888	3.23046	6.66928	8.46355	0.522673
FBtr0070355	FBgn0052801	CG32801	0	0.131722	0	0.0644634	0	0.268515	0	0	0	0	0.0635343	0	NA
FBtr0070356	FBgn0052803	CG32803	70.5506	68.585	66.6725	58.2941	64.0798	65.5121	60.0944	71.6523	64.5483	64.7484	58.8587	64.541	0.331082
FBtr0070362	FBgn0023518	trr	44.5691	45.0173	42.6194	54.7411	44.5095	57.2021	42.6523	37.9532	38.8888	34.8055	71.0964	61.2283	0.517303
FBtr0070363	FBgn0023518	trr	0	0	0.511359	0.749303	0.475752	0.532125	0	0	0	0.216678	0	0.268351	0.518
FBtr0070364	FBgn0026088	CG14818	75.3505	70.039	62.916	55.2721	55.6809	57.4387	73.062	64.3986	57.064	55.5758	54.3097	48.7314	0.137314
FBtr0070365	FBgn0026089	CG14817	121.691	107.248	114.382	97.7411	111.585	98.643	110.788	126.104	101.508	124.846	90.4906	101.897	0.439631
FBtr0070366	FBgn0023517	Pgam5	110.552	107.858	109.914	104.117	104.105	109.628	110.025	105.319	113.706	122.129	104.488	104.272	0.525719
FBtr0070367	FBgn0023516	Pex5	6.11554	8.10104	6.80142	9.27034	6.58387	7.83917	9.51108	7.75206	9.05855	5.14427	8.72241	7.24647	0.699929
FBtr0070368	FBgn0023516	Pex5	46.9659	47.3719	42.9874	36.8195	41.6232	42.3854	42.794	46.9813	39.6863	48.0262	39.5593	43.2115	0.415055
FBtr0070369	FBgn0023515	CG14814	461.013	447.587	425.486	418.754	440.904	428.317	427.961	434.137	396.732	425.917	404.514	438.091	0.356658
FBtr0070370	FBgn0023515	CG14814	86.9636	53.7632	65.4704	75.1524	61.2763	67.2999	70.1219	79.9085	90.4967	68.0623	68.9424	68.6987	1
FBtr0070371	FBgn0028969	deltaCOP	30.6855	32.9567	25.089	26.8971	28.9077	36.7439	28.4553	28.8609	32.359	26.65	37.0089	28.8742	1
FBtr0070372	FBgn0026090	CG14812	58.2435	59.8437	63.3773	42.5948	54.8969	53.9657	59.852	69.9799	48.6876	53.3375	51.7202	51.348	0.23946
FBtr0070374	FBgn0029589	CG14810	0	0	0	0	0	0	0	0	9.15e-05	0	0	0	NA
FBtr0070375	FBgn0025624	CG4025	13.9515	16.01	14.4889	13.0686	13.4127	13.0496	16.3711	16.7831	11.897	12.0209	12.2404	14.4101	0.388879
FBtr0070376	FBgn0040395	Unc-76	32.4226	29.648	34.6756	39.1322	40.0155	39.3742	30.664	37.5992	40.2944	30.3913	46.6132	46.3746	0.311401
FBtr0070377	FBgn0040395	Unc-76	21.6896	27.238	24.081	16.3763	13.2872	17.9918	24.8514	23.6541	12.7037	21.5912	14.8019	13.3387	0.211086
FBtr0070378	FBgn0000382	csw	59.763	70.476	70.5099	81.0627	67.805	86.9936	64.5115	62.3214	64.0329	55.3047	96.7787	85.2568	0.542509
FBtr0070379	FBgn0000382	csw	0.500665	0.492244	0.671778	0.799235	0.559664	0.853515	0.557626	0.498313	0.429641	0.604214	0.86733	0.749549	0.463995
FBtr0070380	FBgn0000382	csw	0.000157815	0	0	5.66e-08	8.69e-08	0	0	0	3.39e-09	0	1.68e-10	9.11e-08	NA
FBtr0070381	FBgn0023507	CG3835	16.3763	25.9602	19.5574	11.3031	15.7439	15.3863	21.1798	17.7531	15.0227	8.81357	17.6182	11.5122	0.156837
FBtr0070382	FBgn0023507	CG3835	1.3816	1.74737	3.24789	1.9662	1.84988	2.13721	3.28569	3.32498	1.55991	1.35609	2.18564	1.24539	0.63633
FBtr0070383	FBgn0023507	CG3835	0.90548	0.338195	0.468646	2.19214	1.54141	2.1876	0.986739	0.907341	0.98412	0.139243	0.594968	0.722317	0.79402
FBtr0070384	FBgn0004654	Pgd	0.418855	0	0	1.33721	0	0.466961	0.632435	0.19624	0	0.207144	0.219393	0.220216	0.464708
FBtr0070385	FBgn0023540	CG3630	0	0	0	0	0	0	0	0	0	0	0	0	NA
FBtr0070386	FBgn0025839	CG3621	124.753	121.174	111.885	109.399	128.349	112.965	107.084	116.727	124.092	126.76	110.763	123.089	0.503334
FBtr0070387	FBgn0011576	Cyp4d2	0.0771579	0	0.235004	0	0.132924	0.325394	0.231321	0	0	0	0.095002	0.131109	NA
FBtr0070388	FBgn0015036	Cyp4ae1	2.24868	1.3912	1.6275	1.41571	1.63464	1.11004	2.29498	2.02332	2.33644	1.80995	2.31087	1.61301	0.658577
FBtr0070389	FBgn0003116	pn	39.6251	41.4891	35.7427	35.5819	39.538	40.9404	37.8461	39.9008	39.1611	37.8863	40.3406	41.1372	0.474088
FBtr0070390	FBgn0040899	CG17776	192.18	179.275	177.85	145.715	147.434	144.367	164.159	175.677	155.984	177.821	144.17	159.5	0.187244
FBtr0070392	FBgn0024984	CG3457	196.922	232.916	210.896	179.921	188.765	188.77	196.52	201.399	187.046	178.109	171.659	177.254	0.0540489
FBtr0070393	FBgn0023549	Mct1	21.1397	23.6156	21.4782	17.7975	20.8343	21.332	19.9035	20.2835	24.6055	13.411	23.3204	27.1794	0.608713
FBtr0070396	FBgn0000810	fs(1)K10	41.5225	51.2098	41.8826	44.75	46.4435	52.9904	43.683	44.0321	36.7732	35.4523	53.1032	48.614	1
FBtr0070397	FBgn0023523	Or2a	0.0424158	0.139508	0	0	0.0465738	0.142024	0.128154	0	0.0407358	0.252273	0	0.0895206	NA
FBtr0070398	FBgn0023527	CG3071	98.7421	100.605	105.45	96.9414	101.383	102.883	109.842	104.921	94.6216	99.087	99.9658	105.042	0.437648
FBtr0070399	FBgn0040391	CG2854	0.0317609	0.0696727	0.0334803	0	0.0348102	0.106317	0	0	0	0.0314662	0.167137	0	NA
FBtr0070401	FBgn0003079	phl	76.2188	75.5821	77.7567	77.7625	75.9679	78.0093	82.3369	77.6134	77.121	74.7152	84.1049	82.6093	0.44734
FBtr0070402	FBgn0003159	ptr	84.2397	89.2172	96.7294	104.877	90.8061	93.3678	74.8354	86.066	92.8494	80.1595	91.483	107.34	0.674381
FBtr0070403	FBgn0003159	ptr	0.8092	1.33798	1.26057	1.7258	2.42576	1.00558	0.611733	1.23483	2.13629	1.0042	1.5829	1.28013	0.644322
FBtr0070404	FBgn0003159	ptr	8.7284	6.53755	7.59578	11.0691	13.6832	9.64566	6.08555	6.72515	13.4861	5.06733	14.029	11.3995	0.540509
FBtr0070405	FBgn0040389	mRpL14	90.1089	82.9861	84.2752	69.2616	84.0121	77.8274	74.8271	85.346	69.489	90.0831	80.1079	82.5537	0.459902
FBtr0070406	FBgn0044047	Ilp6	0.755542	0.562442	0.597145	0.834017	0.916048	0.571988	0.262949	0.354035	0.5955	0.693139	0.908146	0.863264	0.591065
FBtr0070407	FBgn0040392	CG14050	0	0.258551	0.373812	0.189763	0.324832	0.263509	0.356572	0.110599	0.226861	0.234127	0.124683	0.249379	NA
FBtr0070408	FBgn0023526	CG2865	132.162	135.499	138.912	125.865	125.992	129.137	129.484	139.793	130.898	126.775	135.325	132.458	0.330799
FBtr0070411	FBgn0023529	CG2918	136.395	145.097	137.139	150.815	129.477	149.963	150.198	145.539	158.518	154.325	181.258	174.768	0.314818
FBtr0070412	FBgn0023528	CG2924	48.6639	41.2611	45.5423	131.037	104.635	85.7861	48.867	30.6315	68.9113	59.3098	134.517	135.845	0.0956363
FBtr0070414	FBgn0027296	temp	35.3993	33.6995	32.4091	35.626	37.7433	35.6046	34.676	37.2445	33.8066	30.7665	41.133	37.9732	0.492478
FBtr0070415	FBgn0023524	CG3078	0.018173	0.0197479	0.038185	0.00961749	0.0293521	0.0505842	0.00916739	0.0257995	0	0.00896643	0.0192048	0	NA
FBtr0070416	FBgn0029608	CG3091	0	0.242899	0.0467511	0.0474231	0.146021	0.0989243	0.0446302	0	0	0.263586	0.0467248	0	NA
FBtr0070417	FBgn0023525	CG3191	0	0.378695	0	0	0	0	0	0	0	0	0	0	NA
FBtr0070418	FBgn0000377	crn	49.5016	48.3746	46.2817	57.6512	57.3731	60.7024	49.2286	49.9773	52.0102	48.0263	59.7025	59.5702	0.231543
FBtr0070419	FBgn0001330	kz	2.55592	3.04003	3.76413	2.17596	3.06296	2.56452	2.24171	3.56622	1.95884	2.52805	2.14203	2.15006	0.515211
FBtr0070420	FBgn0004397	Vinc	58.1503	59.0526	52.5524	67.327	61.8727	71.6827	53.2191	50.8446	53.9297	45.617	81.9222	73.8911	0.528361
FBtr0070421	FBgn0053548	msta	0	0	0	0	0	0	0	0	0.0651541	0	0	0	NA
FBtr0070422	FBgn0053548	msta	0	0.0325353	0	0	0	0	0	0	0	0.0293821	0	0	NA
FBtr0070423	FBgn0023550	CG18031	0	0	0	0	0	0	0	0	0	0	0	0	NA
FBtr0070424	FBgn0029603	CG14053	0	0	0	0	0	0	0	0	0.712506	0.493138	0	0	NA
FBtr0070425	FBgn0023542	Nmd3	50.7411	47.3996	45.9367	67.4834	72.5386	69.2884	65.8231	60.6756	71.494	72.4356	65.3819	72.2846	0.0172863
FBtr0070426	FBgn0023541	Cyp4d14	0.0238693	0.107099	0.130184	0	0.128035	0.0955987	0.191458	0	0.0399698	0.0237545	0.101418	0.143974	NA
FBtr0070427	FBgn0005670	Cyp4d1	0.212713	0.272566	0.0334579	0.0874382	0.0695738	0.258808	0.100201	0.314085	0.15369	0.210881	0.315476	0.0840889	0.680175
FBtr0070428	FBgn0005670	Cyp4d1	0.287259	0.209101	0.0651293	0.244957	0.0338551	0.161745	0.369116	0.215449	0.146914	0.100807	0.14812	0.243858	NA
FBtr0070429	FBgn0004655	wapl	66.7089	81.0994	70.0366	90.6879	68.838	92.9691	73.7284	69.8389	66.2815	60.0417	126.36	101.495	0.491786
FBtr0070430	FBgn0004655	wapl	111.83	121.935	100.618	124.475	103.12	121.653	101.775	88.1204	98.6628	90.5358	163.342	127.99	0.821851
FBtr0070431	FBgn0013432	bcn92	100.087	98.5852	100.934	84.8274	93.4781	93.1001	98.8432	99.7488	92.681	93.4635	87.99	89.8073	0.26037
FBtr0070432	FBgn0004861	ph-p	0.275042	1.05255	0.509545	0.533428	0.211511	0.646733	0.234278	0.213161	0.46937	0.191925	0.587286	0.477219	0.781452
FBtr0070433	FBgn0004860	ph-d	24.563	29.2023	24.6969	30.378	23.2546	29.5635	23.7027	24.3793	25.1516	19.1887	36.2581	31.6349	1
FBtr0070434	FBgn0040394	CG16903	69.9895	75.3551	73.6693	73.8813	73.0629	78.1727	72.855	73.4081	71.5891	67.6379	81.7588	77.5061	0.47079
FBtr0070435	FBgn0004050	z	0.50845	0.837606	1.33714	0.270541	0.277113	0.283423	0.51181	1.4293	0.487092	0.502906	3.99484	2.13856	0.881113
FBtr0070436	FBgn0260753	Pdfr	0	0	0	0	0	0	0	0	0	0	0	0	NA
FBtr0070437	FBgn0040376	CG13759	0	0	0	0	0	0	0	0	0	0	0	0	NA
FBtr0070438	FBgn0040066	wds	85.4162	77.2365	81.4562	75.3617	66.0676	87.3474	89.16	88.3672	69.1433	84.0266	76.3494	87.0676	0.673909
FBtr0070439	FBgn0001404	egh	92.2987	96.7598	98.3051	95.7333	87.2661	93.5372	92.0359	90.8857	87.8896	93.0229	108.129	98.5439	0.477576
FBtr0070440	FBgn0001404	egh	2.03906	1.83299	1.86581	2.57694	2.25279	2.77397	2.63995	2.93138	2.58257	2.36918	3.75045	3.1334	0.313293
FBtr0070441	FBgn0004643	Zw10	175.619	160.571	165.654	162.994	172.881	164.334	164.77	172.864	163.714	178.056	150.029	166.164	0.645734
FBtr0070442	FBgn0040336	Seipin	41.8114	43.5927	38.2253	37.553	37.8514	39.1035	44.0415	44.6978	41.5794	40.3428	41.4347	46.4586	0.486805
FBtr0070445	FBgn0040334	Tsp3A	13.9795	17.8908	12.8678	11.4337	11.9145	15.4619	17.181	16.8198	11.1525	12.7249	16.1074	16.0398	0.571236
FBtr0070446	FBgn0029629	CG8636	349.799	347.128	348.194	328.887	343.173	346.071	353.808	366.823	356.663	381.643	327.754	343.212	0.516633
FBtr0070447	FBgn0011566	Bzd	45.5804	48.3462	50.6845	46.6689	50.0587	47.6943	51.5421	50.3493	52.9396	53.8158	47.7709	50.1021	0.533443
FBtr0070448	FBgn0011606	Klp3A	5.65694	4.18164	7.09512	7.06191	8.89361	5.09383	4.81828	5.50461	7.19102	3.22804	4.55856	8.46494	1
FBtr0070457	FBgn0040388	boi	39.4627	49.8194	43.8623	47.1822	44.7479	48.6252	43.4485	44.7097	39.5125	36.7687	56.7474	59.6907	0.662212
FBtr0070458	FBgn0040388	boi	4.78592	1.8585	1.84109	1.73997	0.970668	2.25871	1.21136	2.07573	3.53849	1.14314	3.04468	1.1699	0.600321
FBtr0070459	FBgn0003714	tko	139.376	153.651	140.73	128.152	138.432	133.736	151.223	148.615	136.342	147.321	127.633	136.798	0.38101
FBtr0070460	FBgn0001150	gt	0	0	0	0.0310794	0.0956299	0	0	0.0272697	0	0.0288237	0.0306124	0.0306715	NA
FBtr0070461	FBgn0052797	CG32797	0	0.066363	0	0	0	0	0	0	0	0.180309	0.0640243	0	NA
FBtr0070462	FBgn0040385	CG12496	0	0	0	0	0	0	0	0	0	0.0338687	0	0	NA
FBtr0070466	FBgn0003371	sgg	2.72083	9.6256	6.68325	5.85743	5.14428	5.11061	5.80756	6.37416	4.70513	2.80413	4.83859	3.95943	0.681092
FBtr0070467	FBgn0003371	sgg	26.8669	29.9866	31.9792	24.2628	24.0684	32.1207	24.269	28.4194	28.6783	29.0072	37.2563	32.2482	1
FBtr0070468	FBgn0003371	sgg	42.2869	43.4438	48.9406	63.9811	60.7777	55.3003	36.1457	36.6025	60.1423	54.2573	70.4924	76.4285	0.0938308
FBtr0070469	FBgn0003371	sgg	0.438919	0.339381	0.465802	0.27002	0.73408	0.66621	0.559181	0.291466	0.464426	0.227598	1.09911	0.806944	0.736053
FBtr0070470	FBgn0003371	sgg	0	0	0	0	0	0	0	0	0	0	0	0	NA
FBtr0070471	FBgn0003371	sgg	0.424591	0.287119	0.725979	0.177805	0.0737586	0.510446	0.133565	0.215363	1.04614	0.414236	0.747899	0.386117	0.771102
FBtr0070472	FBgn0003371	sgg	22.3934	9.3545	11.3076	9.6938	3.78645	7.53653	29.8487	23.8851	6.65238	19.4257	3.96361	0.0486143	0.460594
FBtr0070473	FBgn0003371	sgg	0.65734	0	0	0.488104	0	0	0	0	0	0	0	0	NA
FBtr0070474	FBgn0003371	sgg	2.02326	3.54351	2.55515	2.79752	3.03864	2.15173	2.16928	2.73352	3.64766	1.90328	2.87863	2.28232	0.634185
FBtr0070475	FBgn0003371	sgg	35.3434	31.4785	31.6199	33.258	29.6986	31.4411	27.8188	31.4205	25.0198	27.0404	34.8583	34.4601	0.470102
FBtr0070476	FBgn0003371	sgg	0	0.106295	0	0	0.104453	0	0	0.464888	0	0.250402	0.103781	0	NA
FBtr0070477	FBgn0003068	per	0	0.119829	0.171355	0.0809494	0.0711058	0	0.393301	0	0.176846	0.193313	0.182181	0.342639	0.636335
FBtr0070478	FBgn0024993	CG2662	67.122	69.8573	67.498	49.6569	59.7069	58.7944	67.3349	71.0924	54.2291	62.6123	55.1653	59.3943	0.137314
FBtr0070479	FBgn0024996	eIF2B-beta	65.3729	62.5972	65.6746	65.6742	72.2162	70.5044	66.4687	68.666	62.1687	68.4884	56.1786	63.6245	0.962644
FBtr0070480	FBgn0024997	CG2681	0.0889925	0.0244119	0.0234379	0.0712282	0.0486883	0.0744547	0.0672035	0.166798	0.0640246	0.0440618	0.140297	0.0937521	NA
FBtr0070481	FBgn0024991	CG2694	20.1045	20.0757	19.8712	23.156	21.8886	20.1596	18.0117	17.7484	16.7009	19.3059	26.4238	16.3825	0.728193
FBtr0070482	FBgn0024991	CG2694	30.5318	31.4854	33.9782	23.623	23.7519	26.9333	36.1163	32.8414	26.7727	29.2048	30.5564	33.3357	0.427732
FBtr0070484	FBgn0000928	fs(1)Yb	0.141665	0.279888	0.0298323	0.0604108	0.216714	0.236993	0.1141	0.159306	0.0679137	0.0981561	0.461013	0.208796	0.603596
FBtr0070485	FBgn0000927	fs(1)Ya	298.58	297.87	294.225	300.102	317.399	326.933	288.995	289.369	283.431	287.424	297.446	322.092	0.459739
FBtr0070486	FBgn0024977	CG2709	0.698285	0.382359	0.221381	0.224915	0.308125	0.233986	0.703492	0.327282	0.268686	0.831808	0.517338	0.147718	NA
FBtr0070487	FBgn0000520	dwg	44.7527	44.686	47.1023	46.4667	44.3977	49.6698	47.2806	49.3587	44.8055	41.9892	52.3649	52.9903	0.482444
FBtr0070488	FBgn0024975	CG2712	38.635	37.4969	38.0835	36.9677	38.1438	35.738	43.8429	42.2556	35.789	37.8934	36.8646	38.4178	0.444443
FBtr0070489	FBgn0040356	CG12498	0	0	0	0	0	0.0647505	0	0	0	0	0	0	NA
FBtr0070490	FBgn0003996	w	2.11211	0.283787	1.92981	2.80576	2.71168	2.52435	1.30202	1.6158	0.868271	1.7713	2.71789	1.22599	0.476349
FBtr0070491	FBgn0040384	CG32795	40.6999	33.5523	44.2332	34.1725	31.708	32.283	38.5215	42.7082	44.4038	38.1786	39.7373	36.6313	0.460072
FBtr0070492	FBgn0040384	CG32795	6.38834	5.61541	4.66968	8.35859	8.03408	7.65025	6.2985	5.58071	5.58401	5.04145	7.03509	4.63292	0.693658
FBtr0070493	FBgn0040384	CG32795	22.5563	18.4929	20.8131	21.4959	26.3938	17.7436	18.2286	20.1333	19.9082	17.3015	19.5242	19.4308	0.599257
FBtr0070494	FBgn0024980	Syx4	0	0	0.0856321	0	0	0	0	0	0	0.0805166	0.170556	0	NA
FBtr0070495	FBgn0000376	crm	95.618	110.538	97.3426	108.731	96.7244	114.871	87.6375	91.6059	91.584	78.0154	139.661	122.795	0.946258
FBtr0070496	FBgn0000376	crm	5.74782	2.39738	3.55136	4.69355	5.55862	2.93849	5.4475	2.7389	2.29675	1.78077	5.56505	2.62402	0.816866
FBtr0070497	FBgn0250874	ttm50	100.423	96.0669	91.9219	84.9325	92.1644	88.9387	102.299	107.598	83.8682	96.5801	80.7581	91.6007	0.345192
FBtr0070498	FBgn0024973	CG2701	38.9072	42.2815	42.3246	44.9193	46.4423	51.3123	40.4975	44.2229	47.884	41.747	49.1038	49.8172	0.321814
FBtr0070499	FBgn0024998	CG2685	90.0881	86.1542	82.8359	86.717	85.8458	87.7887	80.9571	83.5393	81.7901	79.9186	86.4061	85.2285	0.426793
FBtr0070501	FBgn0024994	Csat	34.5289	38.4684	36.3011	38.7487	34.7546	39.2542	40.7531	32.8713	35.496	37.7417	36.1262	35.5804	0.548723
FBtr0070502	FBgn0024992	CG2658	75.8511	75.1131	73.0942	71.2634	75.4347	78.6465	68.7634	76.3156	74.8532	63.0634	76.9863	75.8272	0.433388
FBtr0070504	FBgn0000092	CG2650	0	0	0	0	0	0.183703	0.0552437	0	0	0	0	0	NA
FBtr0070505	FBgn0025838	CG2652	0	0	0	0	0	0	0	0	0	0	0	0	NA
FBtr0070506	FBgn0011276	HLH3B	0	0.162683	0	0	0	0.0413892	0.03735	0	0	0	0.0390648	0.0782413	NA
FBtr0070507	FBgn0004647	N	2.20501	3.09971	2.31953	4.22375	3.07652	3.04824	2.1308	1.81823	2.87285	1.48306	4.15789	3.43152	0.768308
FBtr0070508	FBgn0040396	CG3939	2.06696	1.41877	1.08716	1.64971	0.563475	0.576286	1.30086	2.66311	1.23758	1.78887	2.43598	1.35839	0.724285
FBtr0070509	FBgn0000479	dnc	0.411268	0.318542	0.208142	0.465651	0.397583	0.311969	0.43518	0.506241	0.284951	0.25408	0.293452	0.374174	0.644872
FBtr0070511	FBgn0000479	dnc	0	0	0	0	0	0	0	0	0	0	0	0	NA
FBtr0070512	FBgn0000479	dnc	0	0	0	0	0	0	0	0	0	0	0	0	NA
FBtr0070513	FBgn0000479	dnc	0	0	0	0	0	0	0	0	0	0	0	0	NA
FBtr0070515	FBgn0000479	dnc	0.639381	0.629116	0.781464	0.697866	0.694772	0.452983	0.519507	0.628218	0.630692	0.390021	0.617891	0.691181	0.57915
FBtr0070517	FBgn0000479	dnc	17.6586	19.2938	16.5675	16.2906	14.5867	20.696	16.3989	20.8933	15.7023	18.7205	19.1947	20.6611	0.632116
FBtr0070518	FBgn0000479	dnc	4.52489	4.2744	4.18458	6.61362	7.17874	6.05785	4.0155	4.34832	5.51025	2.61003	6.85992	6.75482	0.610481
FBtr0070519	FBgn0000479	dnc	0.549692	0.591903	0.559086	0.532351	0.577656	0.755894	0.743318	0.574159	1.00299	0.428964	0.64198	0.694929	0.64981
FBtr0070520	FBgn0000479	dnc	22.109	26.3479	22.6255	27.1916	24.9223	25.9743	23.0184	26.3053	23.5487	24.0331	27.5206	20.5294	1
FBtr0070521	FBgn0000479	dnc	0	0	0	0	0	0	0	0	0.177067	0	0.174709	0	NA
FBtr0070522	FBgn0000479	dnc	0	0	0.496581	0.332	0	0	0.860008	0.580181	0	0.336297	0.282973	0.593478	0.523099
FBtr0070523	FBgn0002933	ng1	0	0	0	0	0	0	0	0	0	0	0	0	NA
FBtr0070525	FBgn0262656	dm	150.693	152.754	159.266	138.836	130.265	154.527	146.288	158.081	153	146.245	158.745	145.721	0.363685
FBtr0070526	FBgn0029660	CG10801	0	0	0	0	0.0646279	0	0	0	0	0	0	0	NA
FBtr0070527	FBgn0029662	CG12206	0	0	0	0	0	0	0	0	0	0	0	0	NA
FBtr0070528	FBgn0029662	CG12206	0	0	0	0	0	0	0	0	0	0	0	0	NA
FBtr0070529	FBgn0029662	CG12206	0	0.0236918	0.022745	0.0230399	0	0	0	0.0202362	0	0	0	0	NA
FBtr0070530	FBgn0029661	CG16781	0	0	0	0	0	0	0	0	0	0	0.110175	0	NA
FBtr0070531	FBgn0029659	CG16782	0	0.0516558	0	0.0504496	0	0.105208	0.14239	0	0	0	0	0	NA
FBtr0070532	FBgn0029658	CG14269	0	0	0	0	0	0	0	0	0	0	0	0	NA
FBtr0070533	FBgn0052493	tRNA:CR32493	0	0	0	0	0	0	0	0	0	0	0	0	NA
FBtr0070534	FBgn0029657	CG12535	0	0	0	0	0	0.0191171	0.0768596	0	0	0	0.0401999	0.0402548	NA
FBtr0070536	FBgn0029656	CG10793	0.031425	0	0.0331255	0.0671502	0	0.0701278	0	0.0883537	0.0301608	0.0311329	0.0661444	0.0993938	NA
FBtr0070537	FBgn0003086	Pig1	0	0	0	0	0	0	0	0	0	0	0	0	NA
FBtr0070538	FBgn0010296	ng4	0	0	0	0	0	0	0	0	0	0	0	0	NA
FBtr0070539	FBgn0010295	ng3	0	0	0	0	0	0	0	0	0	0	0	0	NA
FBtr0070540	FBgn0010294	ng2	0	0	0	0	0	0	0	0	0	0	0	0	NA
FBtr0070541	FBgn0040393	CG14265	0	0	0	0	0	0	0	0	0	0	0	0	NA
FBtr0070542	FBgn0000644	Fcp3C	0.058202	0.191308	0.0614598	0	0	0.259955	0	0	0.223796	0.173223	0.0614945	0.430507	NA
FBtr0070543	FBgn0028746	CG18508	67.1905	80.4529	66.1997	68.9378	84.5795	79.2325	82.7192	90.2075	84.0314	69.0275	62.8557	75.8852	0.659277
FBtr0070546	FBgn0040355	CG3526	0	0	0	0	0	0	0	0	0	0	0	0	NA
FBtr0070550	FBgn0052793	CG32793	0	0	0	0	0	0.0626101	0.0565155	0	0.0358888	0.0555735	0.0786187	0.0197054	NA
FBtr0070551	FBgn0029642	CG3592	0	0.075043	0.0724047	0	0	0	0	0.0642295	0.0659078	0	0	0	NA
FBtr0070552	FBgn0025645	CG3598	0	0	0	0	0	0	0	0	0.101431	0.0523421	0.0557157	0	NA
FBtr0070553	FBgn0029643	CG14420	0	0	0	0	0	0.0745153	0	0	0.0320498	0	0.0702993	0	NA
FBtr0070554	FBgn0029644	CG14421	0.20264	0	0	0.0725005	0.0744847	0	0	0	0.0649676	0.134088	0.142932	0	NA
FBtr0070555	FBgn0029645	CG14422	0	0.0577716	0	0.225903	0.173962	0	0	0	0	0	0.0556534	0	NA
FBtr0070556	FBgn0029646	CG14423	0.22838	0	0.0481928	0.0977791	0	0	0.0920063	0.0428104	0.131626	0.0905697	0.048171	0	NA
FBtr0070557	FBgn0029647	CG17959	0	0	0	0	0	0	0	0	0	0	0.148909	0	NA
FBtr0070558	FBgn0029648	CG3603	11.3614	15.6185	9.66796	6.46268	8.51948	6.66919	10.8351	7.49125	9.42672	6.40348	6.08733	8.9248	0.199378
FBtr0070559	FBgn0028369	kirre	0	0.103067	0	0	0	0	0	0	0	0	0	0	NA
FBtr0070560	FBgn0028369	kirre	12.6196	2.19096	6.60413	18.4505	14.3032	16.7204	5.94738	7.99705	6.64671	13.4864	17.2167	11.3104	0.251205
FBtr0070561	FBgn0029649	CG4116	0	0.324797	0.187842	0	0	0	0.298627	0	0	0	0	0	NA
FBtr0070562	FBgn0003285	rst	33.3081	6.04355	19.9153	45.1067	37.2791	39.1779	14.6264	16.4657	17.1991	48.6063	45.979	33.1773	0.217296
FBtr0070563	FBgn0025644	CG14424	0.105667	0	0.167313	0.169806	0.116235	0.0589854	0	0.0495208	0.050772	0.262002	0	0.390619	NA
FBtr0070564	FBgn0029639	CG14419	0	0	0	0	0.0901667	0	0	0	0	0	0.172965	0	NA
FBtr0070565	FBgn0040354	CG14418	0	0	0	0	0	2.55e-05	0	0	0	0	1.84e-05	0	NA
FBtr0070566	FBgn0040353	CG14417	0	0.0542876	0.0522732	0	0	0	0	0	0	0	0.0522658	0	NA
FBtr0070567	FBgn0040352	CG14416	0	0	0.0653126	0.0663225	0.0681265	0.138106	0	0	0.0594548	0.0613577	0.326845	0	NA
FBtr0070568	FBgn0029664	CG10802	58.8766	59.1392	59.1376	56.1978	61.6526	57.1475	67.7111	61.4635	68.0125	62.8895	59.3365	62.574	0.484155
FBtr0070569	FBgn0029666	CG10803	44.5013	43.617	46.0418	41.5127	42.1496	46.4694	46.052	47.6276	45.0478	43.8541	49.3186	47.6385	0.477576
FBtr0070570	FBgn0029669	CG13021	0	0.115321	0.111683	0	0	0.117885	0	0	0.20324	0	0	0	NA
FBtr0070571	FBgn0029669	CG13021	0	0	0	0	0	0	0	0	0	0	0	0	NA
FBtr0070575	FBgn0266429	AstA-R1	2.34e-10	0	0	0	6.48e-10	0	2.04e-10	0	0	2.81e-10	0	0	NA
FBtr0070577	FBgn0044046	Ilp7	0	0	0	0	0	0.118234	0	0	0	0	0	0	NA
FBtr0070578	FBgn0023215	Mnt	0	0	0	0	0	0	0	0	0	0	0	0	NA
FBtr0070579	FBgn0023215	Mnt	0	0	0	0	0	0	0	0	0	0	0	0	NA
FBtr0070582	FBgn0015286	Rala	27.7539	28.6705	22.6566	28.5136	33.301	34.0598	21.8439	24.9619	28.1171	39.1731	31.8963	24.8865	0.47064
FBtr0070583	FBgn0015286	Rala	17.2093	14.6083	12.1488	14.0445	15.2152	16.6428	11.7349	8.45011	15.3879	19.0747	13.3549	11.673	1
FBtr0070584	FBgn0015286	Rala	110.855	112.315	117.442	104.218	106.822	97.4081	113.288	116.969	104.833	112.324	107.724	110.394	0.383086
FBtr0070586	FBgn0029672	CG2875	95.2279	85.5541	91.6227	87.2242	83.7352	80.2086	86.4577	92.2667	88.7083	87.7107	86.8845	90.3745	0.395006
FBtr0070587	FBgn0029672	CG2875	0	0	0	0	0	0	0	0	0	5.51e-07	0	0	NA
FBtr0070588	FBgn0052791	CG32791	0	0	0	0	0	0	0	0	0	0	0	0	NA
FBtr0070589	FBgn0029667	Gas8	0	0	0	0	0	0	0	0	0	0.0279832	0	0	NA
FBtr0070590	FBgn0029665	CG14270	83.1444	66.8237	77.893	69.0762	81.4452	78.2409	82.0068	78.7218	82.3403	89.3283	77.6475	85.5033	0.650172
FBtr0070591	FBgn0029663	CG10804	0	0	0	0	0	0	0	0	0	0	0	0	NA
FBtr0070592	FBgn0029663	CG10804	0.0119423	0	0.0125724	0	0	0	0	0.011191	0	0.0118194	0.0125325	0	NA
FBtr0070596	FBgn0086899	tlk	6.9324	6.18164	9.49461	10.2984	6.88032	8.33659	7.12577	6.84158	10.3131	6.93883	12.0797	10.1249	0.496276
FBtr0070597	FBgn0029676	HIP-R	78.1773	85.2741	87.8943	90.0195	98.6251	102.485	81.6368	85.5206	73.6632	86.0206	92.4097	98.94	0.433983
FBtr0070598	FBgn0029676	HIP-R	3.48808	1.90914	1.64646	2.18933	3.89759	1.02653	1.59948	2.24586	3.91959	1.03897	1.69473	2.2736	0.773115
FBtr0070599	FBgn0021738	Crg-1	0	0	0.185276	0.0968301	0	0.050407	0.0447726	0	0.126588	0.130992	0.0940929	0.0485013	NA
FBtr0070600	FBgn0260484	HIP	123.195	133.013	133.843	165.248	169.023	166.51	131.079	132.894	137.754	137.969	168.065	163.062	0.152121
FBtr0070603	FBgn0052785	tRNA:CR32785	0	0	0	0	0	0	0	0	0	0	0.793579	0	NA
FBtr0070604	FBgn0025118	tRNA:P:3E	0	0	0	0	0	0	0	0	0	0	0	0	NA
FBtr0070605	FBgn0029679	CG2901	0	0	0	0	0	0	0	0	0	0	0	0	NA
FBtr0070606	FBgn0000542	ec	1.82e-08	0	0.051286	0.0645967	0.0831688	0	0	0.127997	3.6e-08	0.0711334	0.0886112	0.158844	0.389406
FBtr0070608	FBgn0028491	CG2930	0	0.0566005	0.0506252	0.0371417	0	0	0.0882305	0.0335291	0	0.0638024	0.0416067	0.0527513	NA
FBtr0070609	FBgn0028491	CG2930	0.196917	0.369342	0	0.117265	0.146703	2.24e-10	0.354967	0	0	0	0.189708	0.52925	0.846339
FBtr0070610	FBgn0028491	CG2930	0	0	0	0	0	0.615235	0	0	0.337356	0.283845	0	0	NA
FBtr0070611	FBgn0028665	VhaAC39-1	214.446	233.591	242.513	195.879	204.256	210.321	219.865	217.081	222.198	221.209	218.37	218.795	0.270901
FBtr0070612	FBgn0029681	CG15239	0	0	0	0	0	0	0	0	0.0246444	0	0	0	NA
FBtr0070613	FBgn0029686	CG2941	39.7416	38.527	37.1205	39.014	39.244	38.7839	40.3131	39.3682	42.0314	43.3355	42.6388	42.6378	0.44533
FBtr0070616	FBgn0029687	Vap-33A	198.831	202.078	206.228	199.505	213.041	205.75	193.164	205.123	205.004	196.396	212.997	208.891	0.437648
FBtr0070617	FBgn0029687	Vap-33A	0	0.307042	0	0	0.364441	0	0	0	0.149121	0	0.179195	0.164872	NA
FBtr0070618	FBgn0029687	Vap-33A	1.77177	1.64436	1.56412	1.46136	1.41144	1.28914	1.18414	1.25894	1.68998	1.20794	1.58947	0.836366	0.437648
FBtr0070624	FBgn0029690	CG6414	0	0	0	0	0	0.412775	0	0.115319	0	0	0.0859227	0	NA
FBtr0070625	FBgn0029689	CG6428	33.7815	35.8461	33.52	34.1471	32.583	35.6446	36.8623	37.3468	36.5236	33.2794	37.52	36.3814	0.457143
FBtr0070626	FBgn0029688	lva	25.2935	28.3504	32.7865	42.8057	24.8949	33.7711	24.439	26.2175	31.8695	24.8409	47.546	37.7771	0.554028
FBtr0070627	FBgn0029685	CG2938	56.2731	62.5121	56.7507	61.0081	52.3795	62.3106	58.8855	56.5147	49.041	53.6235	73.5905	71.0596	0.689834
FBtr0070634	FBgn0019661	roX1	0.0131624	0.0722392	0	0	0	0.0440379	0.0132515	0.0123345	0.0252385	0.0260555	0	0	NA
FBtr0070635	FBgn0019661	roX1	0	0	0	0	0	0	0	0	0	0	0	0	NA
FBtr0070638	FBgn0000221	brn	20.2002	19.9127	20.6851	19.3741	18.398	19.9382	22.8028	22.3834	19.5333	22.4747	19.8923	21.306	0.495592
FBtr0070639	FBgn0026084	cib	1023.21	948.981	1036.86	961.323	990.094	978.457	1023.18	1014.87	1069.39	1002.12	1040.12	1007.93	0.426793
FBtr0070640	FBgn0026084	cib	1.81117	1.67926	2.3868	1.62816	1.39938	2.229	1.23363	1.16015	2.01441	2.01338	2.35813	0.816096	0.657266
FBtr0070641	FBgn0026084	cib	40.5984	35.9777	51.1669	61.6008	57.2411	49.325	44.5591	44.9657	52.6818	37.57	53.8635	51.7434	0.545432
FBtr0070642	FBgn0026085	dgt4	81.7485	81.8892	75.6054	76.1077	88.145	103.902	84.2941	86.6265	72.2302	79.4408	70.5815	78.3512	1
FBtr0070643	FBgn0026083	tyf	0	0	0	0	0	0	0	0	0	0	0	0	NA
FBtr0070644	FBgn0066114	GlcAT-I	68.865	67.0085	69.2342	61.954	62.0081	66.7506	66.3345	67.7548	61.1325	66.3669	66.3032	63.5759	0.349432
FBtr0070645	FBgn0029697	CG15570	0	0	0	0	0	0	0	0	0	0	0	0	NA
FBtr0070646	FBgn0029701	CG12691	0	0	0	0	0	0	0	0	0	0	0	0	NA
FBtr0070647	FBgn0029702	CG15572	0	0	0	0	0	0	0	0	0	0	0	0	NA
FBtr0070648	FBgn0266570	CG2982	254.445	284.002	302.61	271.227	266.528	267.998	264.932	272.747	278.591	266.474	285.769	284.257	0.435222
FBtr0070650	FBgn0262738	norpA	13.7556	16.7627	9.56719	6.32791	6.3653	5.98186	12.2595	10.7873	8.28207	8.46184	10.3182	5.77847	0.15756
FBtr0070651	FBgn0262738	norpA	0	0	0	0	0	0	0	0	0	0	0	0	NA
FBtr0070652	FBgn0029706	CG3626	39.8474	46.6081	43.516	42.4917	40.4782	48.3736	41.1443	46.1448	42.8124	37.9225	50.4932	49.1745	1
FBtr0070654	FBgn0029705	CG12693	0	0	0	0	0	0	0	0	0	0	0	0	NA
FBtr0070655	FBgn0040907	mRpL33	61.5728	51.7038	56.7415	69.2746	70.1818	63.8827	60.9496	60.3947	69.5784	69.8519	66.0628	60.7795	0.473177
FBtr0070656	FBgn0002707	mei-9	0	0	0.434862	0.439923	0.45061	0	0.416124	1.16208	0.396027	0	2.16532	0.869373	0.529686
FBtr0070657	FBgn0040906	CG15579	0	0.178467	0	0	0	0	0.329399	0	0	0	0.350458	0	NA
FBtr0070658	FBgn0029703	CG12692	0	0.0591039	0	0	0	0	0	0	0	0	0.0283311	0	NA
FBtr0070659	FBgn0040905	CG15578	0	0	0	0	0	0	0	0	0	0	0	0	NA
FBtr0070660	FBgn0040904	CG15577	0	0	0	0	0	0	0	0	0	0	0	0	NA
FBtr0070661	FBgn0029700	CG15576	0	0	0	0	0	0	0	0	0	0	0	0	NA
FBtr0070663	FBgn0041252	Femcoat	0	0	0	0	0	0	0	0	0	0	0	0	NA
FBtr0070664	FBgn0029696	CG15571	0	0	0	0	0	0	0	0	0	0	0	0	NA
FBtr0070665	FBgn0000635	Fas2	0.0872294	0	0	0	0.190166	0.0972478	0	0.0817368	0	0.342248	0.468344	0	0.476208
FBtr0070666	FBgn0000635	Fas2	0.0662493	0.486544	1.85e-07	0	0.0337382	0.0777141	0.265664	0.212326	0	0.416541	0	0.0724194	NA
FBtr0070667	FBgn0000635	Fas2	0.0714351	0	0.0738319	0	0.0778664	0.0398197	0	0	0.02991	0.0651322	0.156065	0.0375574	0.673909
FBtr0070668	FBgn0026080	Tip60	2.41363	1.84611	2.19207	3.94042	3.88076	2.68679	2.43218	3.02325	1.7063	4.22039	6.25904	4.75506	0.124921
FBtr0070669	FBgn0026079	Nsun2	35.5856	38.89	33.344	39.6463	44.4047	45.2566	40.5584	38.0988	40.8993	38.5539	45.2834	42.4308	0.2278
FBtr0070670	FBgn0004832	Xpac	65.057	54.0924	45.5031	50.5514	52.1924	47.1099	57.2169	64.5168	38.1956	64.3186	39.2154	51.1652	0.62945
FBtr0070671	FBgn0029693	CG6379	42.9034	40.1162	43.0156	38.8876	39.7216	41.7819	49.1191	51.3729	42.032	43.4043	37.0226	41.5932	0.446627
FBtr0070672	FBgn0000179	bi	0.0243682	0.0133745	0	0.0519442	0	0.0543517	0	0	0.0233614	0	0	0	NA
FBtr0070674	FBgn0029708	CG3556	0.0834105	0	0.0439315	0	0.0228117	0.0649294	0.0209957	0.0586254	0	0.0825901	0	0.109826	NA
FBtr0070675	FBgn0029709	CHOp24	104.678	110.536	105.805	86.2679	99.4227	87.4129	113.932	112.892	110.206	108.083	88.7787	98.7905	0.313808
FBtr0070676	FBgn0029710	CG3568	2.79682	1.98899	2.59167	1.80588	2.96376	3.49784	3.59006	3.8309	2.53671	1.88774	1.77881	2.65689	0.634332
FBtr0070677	FBgn0029712	CG15912	10.1897	11.5128	11.5767	9.69463	13.5091	13.0259	11.776	13.6363	12.2021	10.3029	10.3011	11.3147	0.604289
FBtr0070678	FBgn0029714	CG3527	86.215	81.0592	85.5536	77.9463	80.75	79.9001	90.7979	85.9501	74.6652	82.7821	70.7224	84.0248	0.387129
FBtr0070679	FBgn0029716	CG3546	0	0	0	0	0	0	0	0	0	0	0	0	NA
FBtr0070680	FBgn0003053	peb	0.716205	0.851422	0.508593	0.979296	0.657839	0.980738	0.241186	0.242603	0.266486	0.789371	1.16925	0.489959	0.673607
FBtr0070681	FBgn0025739	pon	88.2512	77.1661	71.6372	46.7318	63.7096	75.2599	72.8273	93.2472	66.4012	63.5238	51.5954	56.9888	0.162461
FBtr0070682	FBgn0029718	mRpL30	135.32	135.603	125.597	132.291	137.654	135.739	134.597	126.048	141.122	147.331	121.372	131.975	0.590396
FBtr0070683	FBgn0022942	Cbp80	101.576	100.379	90.7619	105.219	104.509	105.897	96.3433	94.3331	94.1424	93.6102	117.711	111.43	0.433531
FBtr0070684	FBgn0022942	Cbp80	1.29417	0.708485	1.59445	4.36046	1.17249	3.13181	1.30811	0.608913	1.66001	2.35642	3.60371	4.31924	0.344537
FBtr0070685	FBgn0022768	Pp2C1	97.5959	108.202	104.201	113.797	95.3041	125.861	100.82	97.3191	95.2577	86.2976	150.38	127.627	0.637731
FBtr0070686	FBgn0262699	rap	124.995	127.026	127.467	126.797	120.875	122.657	120.333	118.005	130.152	118.502	134.597	121.892	0.409952
FBtr0070687	FBgn0262699	rap	0	0	0	0	0	0	0	0	0	0	0	0.233156	NA
FBtr0070688	FBgn0029720	CG3009	0	0	0	0	0	0	0	0	0	0	0	0	NA
FBtr0070689	FBgn0029719	CG15473	0.110774	0	0.0466789	0.0709286	0.0969667	0.0988564	0	0.145336	0.0425038	0.0658151	0.0698534	0.0933581	NA
FBtr0070690	FBgn0025615	Torsin	114.248	118.501	118.309	108.104	110.4	112.231	115.259	115.423	113.306	108.916	121.042	117.299	0.389406
FBtr0070691	FBgn0011277	HLH4C	0	0.0203989	0	0	0	0	0	0.0348686	0	0	0	0	NA
FBtr0070692	FBgn0025612	CG3062	0	0	0	0	0	0	0	0.0559944	0	0	0	0.0631321	NA
FBtr0070693	FBgn0025613	CG3081	0.027045	0.118678	0.0285003	0	0	0	0	0	0	0.0803628	0.113778	0	NA
FBtr0070696	FBgn0025387	CG12184	0	0	0	0	0.127998	0	0	0	0	0	0	0	NA
FBtr0070697	FBgn0029717	CG12684	0	0	0	0	0	0	0	0	0	0	0	0	NA
FBtr0070698	FBgn0029715	CG11444	298.164	280.075	272.834	267.246	300.638	271.266	295.248	281.421	293.974	311.311	272.664	301.712	0.841211
FBtr0070699	FBgn0029713	CG11436	41.4283	43.7029	42.6788	43.0783	39.4704	45.7597	46.4143	44.3165	42.3866	42.3547	45.7793	45.6879	0.464708
FBtr0070701	FBgn0029711	Usf	32.9645	38.4366	36.3485	29.0944	29.3539	33.9916	36.4092	36.4357	34.4997	27.9424	36.0494	31.8963	0.165259
FBtr0070702	FBgn0003210	rb	6.54789	6.02614	5.70669	16.4524	11.6432	12.7158	5.84639	3.68712	12.8386	7.36854	15.4565	13.7345	0.123297
FBtr0070704	FBgn0011760	ctp	0	0.354798	0.16762	0.171758	0.534809	0.180309	0.160355	0.153377	0	0.160482	1.02692	0.992451	NA
FBtr0070706	FBgn0011760	ctp	406.128	410.866	423.984	408.508	423.185	397.315	415.41	406.975	427.765	452.063	447.396	427.312	0.478096
FBtr0070707	FBgn0011760	ctp	0.68824	0.856336	1.17165	1.10651	1.20284	0.835414	0.814038	0.856057	1.42237	1.16446	1.0106	1.04351	0.572082
FBtr0070708	FBgn0028325	l(1)G0334	315.666	313.406	324.118	284.234	301.624	290.352	314.19	325.851	318.271	312.296	279.722	293.187	0.251495
FBtr0070709	FBgn0028325	l(1)G0334	2.80703	0.0225293	7.93e-06	0.0176382	3.51614	0.00482146	9.25522	0.458939	0.0145378	0.00056379	3.98478	0.00103532	NA
FBtr0070710	FBgn0028325	l(1)G0334	0.300806	0.340395	0.927243	0	1.32725	0	0.470358	0	0	0.232198	0	0.326952	0.465559
FBtr0070711	FBgn0028325	l(1)G0334	6.41655	5.34445	6.01508	4.39281	4.36902	6.14972	6.23812	6.66583	5.22345	7.30786	4.12202	7.4383	0.784828
FBtr0070712	FBgn0029722	CG7024	0.0274511	0	0.0289289	0	0.0300643	0.061253	0.0552832	0	0.0263405	0.081571	0.115493	0.202523	NA
FBtr0070713	FBgn0029723	Proc-R	0.103589	0.000219027	0	0	0.179308	0.00119246	0	0	2.45e-09	0.32541	0.281369	0	NA
FBtr0070714	FBgn0029723	Proc-R	0.0568004	0.0670801	0	0.0628934	0.0619117	0	0	0.0479057	0	0	0	0.0627053	NA
FBtr0070715	FBgn0029727	CG6978	0	0	0	0	0	0	0	0	0	0	0	0	NA
FBtr0070716	FBgn0029729	CG12682	0	0	0	0	0	0	0	0	0	0	0	0	NA
FBtr0070717	FBgn0029730	CG12681	0	0	0	0	0	0	0	0	0	0	0	0	NA
FBtr0070721	FBgn0029733	CG6927	273.896	267.605	281.516	263.776	269.768	263.564	278.3	271.877	280.993	278.681	254.549	274.387	0.426875
FBtr0070723	FBgn0029737	CG6903	5.60866	6.1597	6.18091	3.12642	7.2781	5.65731	6.18341	5.00523	5.37306	2.90584	6.99471	3.65088	0.459291
FBtr0070724	FBgn0004368	Ptp4E	25.7275	29.2534	21.4704	30.0581	20.9036	30.5329	23.7571	24.8012	18.672	24.6153	40.0675	36.9921	0.478964
FBtr0070725	FBgn0004368	Ptp4E	0	0	0	0	0	0	0	0	0	0	0	0	NA
FBtr0070727	FBgn0061196	SIP3	0.315788	0.098908	0.14279	0.144849	0.24779	0.151065	0.272612	0	0.259996	0.313074	0.380582	0.0476169	NA
FBtr0070731	FBgn0029728	CG2861	2.76e-08	9.34e-08	8.06e-08	0	3.04e-08	3.18e-08	0	1.49e-08	0	5.99e-08	0	0.000127969	NA
FBtr0070734	FBgn0029725	CG2871	0	0	0	0	0	0	0	0	0	0	0	0	NA
FBtr0070735	FBgn0025679	Bteb2	0	0	0	0	0	0	0	0	0	0	0	0	NA
FBtr0070736	FBgn0029724	CG15472	0	0	0	0	0	0	0	0	0	0	0	0	NA
FBtr0070738	FBgn0003028	ovo	0	0.0942139	0.0410127	0	0.0977099	0	0	0.0391788	0.0411021	0	0	0	NA
FBtr0070739	FBgn0003028	ovo	1.50765	1.33448	1.99891	1.00639	1.53769	1.12894	1.24054	2.05294	1.09767	1.43974	1.47188	2.29852	0.727504
FBtr0070740	FBgn0003028	ovo	135.707	140.902	133.415	147.877	127.734	145.528	123.26	132.915	141.336	112.92	188.834	167.356	0.758635
FBtr0070741	FBgn0029745	Rpn13R	0	0	0	0	0	0	0	0	0	0.0500575	0	0	NA
FBtr0070742	FBgn0029746	CG15465	0	0.0124648	0	0	0	0	0	0	0	0.0110574	0	0	NA
FBtr0070748	FBgn0003449	snf	201.186	183.07	189.552	179.454	203.028	198.655	185.649	187.812	196.907	221.765	181.062	184.754	1
FBtr0070749	FBgn0011761	dhd	8027.6	8351.34	7528.26	7857.3	8520.69	7983.97	7667.21	7550	8611.82	7953.08	7512.01	8050.17	0.400351
FBtr0070750	FBgn0029753	CG4198	2.2416	2.06815	1.86943	1.99156	1.39891	2.35461	1.49299	3.00749	2.14087	0.47714	0.910637	2.38811	0.572856
FBtr0070751	FBgn0029755	Sas10	64.9338	63.3044	64.4201	60.2182	68.18	65.7461	62.9154	63.2119	63.4064	61.294	63.1461	59.3672	0.436585
FBtr0070752	FBgn0014024	Rnp4F	2.75586	2.27003	2.4159	7.08758	5.25711	6.14493	3.69888	3.01274	4.48165	5.67891	9.86423	8.21074	0.0152097
FBtr0070753	FBgn0014024	Rnp4F	0.000158676	3.47e-06	0	0.000118214	0	0	1.02e-08	0.000120272	0.951557	7.02e-05	7.42e-10	2.74e-10	NA
FBtr0070755	FBgn0029752	TrxT	0.51763	0.650099	0.573805	0.476374	0.380373	1.04838	0.348488	0.00263983	0	1.1325	0.587218	0.83505	0.749887
FBtr0070756	FBgn0263237	Cdk7	77.7182	75.4975	79.5378	78.7092	77.2708	78.7343	75.17	78.9378	79.1665	77.8415	86.2389	82.0814	0.457143
FBtr0070757	FBgn0029751	CG17764	0.564379	1.23729	0.397021	0.402794	0.3101	0.1575	1.32634	0.881627	0.722898	0.792746	0.694548	0.84406	0.663303
FBtr0070758	FBgn0029750	CG3323	0.287331	0.819819	0.282459	0.408684	0.293284	0.876024	0.964322	0.520581	0.643002	0.28448	0.74456	0.625413	0.65521
FBtr0070759	FBgn0029747	CG5062	0	0	0	0	0	0	0	0	0	0.0714126	0	0	NA
FBtr0070762	FBgn0024332	Mcm3	48.8172	37.5552	39.8192	50.3111	39.7573	37.6778	35.1596	34.9995	38.8449	38.5032	37.2477	33.8369	0.511083
FBtr0070763	FBgn0026751	XRCC1	50.8699	54.9058	54.2573	54.168	57.3825	61.6516	54.2597	55.2999	60.1501	53.0154	58.8191	55.5019	0.477718
FBtr0070764	FBgn0010014	CanB	0	0	0.234853	0	0.195613	0	0	0	0.171052	0.441372	0	0	NA
FBtr0070772	FBgn0029763	CG4165	33.0903	43.8872	31.6014	53.0939	38.42	40.4454	28.2128	39.5245	45.0358	37.6591	55.9603	67.9887	0.323735
FBtr0070773	FBgn0029763	CG4165	40.556	50.9223	44.8536	48.2692	46.9108	50.0442	51.8123	38.3623	36.9913	39.2566	67.5601	48.3002	0.716635
FBtr0070775	FBgn0029763	CG4165	17.8499	14.8923	15.8273	13.9439	13.3172	23.7713	22.4462	19.7769	11.1337	10.1163	17.1175	12.3341	0.537588
FBtr0070776	FBgn0029765	CG16756	0	0	0	0	0	0	0	0	0	0	0	0.134702	NA
FBtr0070777	FBgn0029766	CG15784	2.05574	4.17465	2.31742	2.59971	2.52791	4.38131	6.06338	6.0529	3.14886	3.77819	6.6601	4.06734	0.417821
FBtr0070778	FBgn0029768	SPR	0	0	0	0	0	0	0	0	0	0	0	0	NA
FBtr0070779	FBgn0029770	CG4151	0	0	0	0	0	0	0	0	0	0	0	0	NA
FBtr0070780	FBgn0029771	CG12730	0	0	0	0	0	0	0	0	0	0	0.0457798	0	NA
FBtr0070781	FBgn0263511	Vsx1	0.0167583	0	0.0352961	0	0.0549593	0.0186914	0.0337449	0	0.0160702	0.0165899	0	0.0176464	NA
FBtr0070782	FBgn0026702	l(1)G0045	44.3474	46.2908	42.7886	44.4703	43.4361	49.0822	44.7229	45.3663	42.0449	38.0592	47.8514	44.7441	0.482806
FBtr0070783	FBgn0004687	Mlc-c	127.583	127.175	130.355	130.995	126.777	130.798	127.271	132.588	132.116	125.706	122.23	134.28	0.454104
FBtr0070784	FBgn0029778	RhoGAP5A	0.560065	0.311145	0.497186	0	0.703381	0.366376	0.265552	0	0	0	0.554838	0	0.429625
FBtr0070785	FBgn0029778	RhoGAP5A	36.2981	38.3977	34.697	40.9944	41.2032	45.7373	37.0042	38.0747	36.0207	35.9708	46.7976	44.9471	0.309275
FBtr0070791	FBgn0052762	CG32762	0	0	0	0	0	0	0	0	0	0	0	0	NA
FBtr0070794	FBgn0263987	spoon	262.622	282.557	275.99	244.42	237.065	270.343	260.245	268.855	242.317	239.844	267.92	269.959	0.264853
FBtr0070795	FBgn0263987	spoon	24.1923	25.535	30.5037	39.9332	34.0557	32.013	27.1733	25.3245	30.2878	25.5978	38.0068	39.8313	0.330799
FBtr0070797	FBgn0029762	NAAT1	0	0.0223052	0.0214109	0	0	0	0.0409319	0	0	0	0	0.0428205	NA
FBtr0070798	FBgn0029756	CG3309	37.3605	39.0797	35.9866	38.0909	37.6463	41.7418	37.3466	38.7166	36.4631	34.5461	46.1996	41.9632	0.491786
FBtr0070799	FBgn0028474	CG4119	71.7149	71.1759	69.204	77.5856	64.8771	77.6202	72.4762	72.1868	67.8255	63.0858	93.4918	81.6435	0.680762
FBtr0070800	FBgn0029785	RpL35	1637.94	1565.01	1587.32	1172.67	1213.67	1249.22	1424.44	1515.05	1323.98	1684.51	1251.83	1294.2	0.285865
FBtr0070801	FBgn0029785	RpL35	806.054	811.928	837.217	837.616	852.221	831.091	750.877	847.989	805.83	660.475	723.148	821.089	0.381497
FBtr0070802	FBgn0003747	Gr5a	0.247639	0.34042	0.111903	0.151266	0.193989	0.3553	0.249382	0.23209	0.295335	0.245388	0.335277	0.186552	0.660083
FBtr0070804	FBgn0000394	cv	0.620175	0.892971	0.355564	0.606234	0.694028	0.372029	0.431919	0.0953976	0.504328	0.493188	0.34844	0.438047	0.6581
FBtr0070806	FBgn0029795	CG15773	0	0	0	0.0664011	0	0	0.0625857	0	0	0.0307864	0	0	NA
FBtr0070807	FBgn0029798	CG4078	56.5493	62.2533	58.3669	60.9503	53.7993	62.382	59.4094	58.4858	59.746	58.7935	70.3151	65.7998	0.491777
FBtr0070808	FBgn0029799	CG15772	0	0	0	0	0	0.130513	0.292933	0	0	0	0	0.109494	NA
FBtr0070809	FBgn0029801	CG15771	180.089	178.733	196.409	180.093	188.769	170.78	195.772	197.44	186.891	187.186	168.977	187.174	0.477576
FBtr0070813	FBgn0029809	CG15767	0	0	0	0.078999	0	0	0	0	0	0	0.0778243	0	NA
FBtr0070814	FBgn0029810	CG12239	0.0216405	0	0.0455937	0	0	0.02414	0.0435784	0.0202802	0.0207579	0	0.0454844	0	NA
FBtr0070815	FBgn0029811	Cpr5C	0	0	0	0	0	0	0	0	0	0	0.11018	0	NA
FBtr0070816	FBgn0029812	Prosbeta2R1	0	0	0	0	0	0	0	0	0	0	0	0	NA
FBtr0070817	FBgn0029814	CG15765	0	0	0.0167328	0	0	0	0	0	0	0.0157297	0	0.0167309	NA
FBtr0070818	FBgn0052761	tRNA:CR32761:Psi	0	0	0	0	0	0	0	0	0	0	0	0	NA
FBtr0070819	FBgn0029816	CG12729	0	0	0	0	0	0	0	0	0	0	0	0	NA
FBtr0070820	FBgn0029817	CG15764	0	0	0	0	0	0	0	0	0	0	0	0	NA
FBtr0070821	FBgn0029820	CG16721	10.987	9.97806	14.1604	13.9248	11.3614	9.89334	12.8748	12.671	6.83071	10.8672	16.6722	15.3128	0.654946
FBtr0070822	FBgn0000042	Act5C	1294.59	1321.39	1310.81	1154.47	1208.44	1318	1336.32	1322.77	1198.2	1329.75	1347.77	1232.31	0.398726
FBtr0070823	FBgn0000042	Act5C	149.325	139.688	162.208	197.517	203.852	200.366	132.444	150.471	188.066	152.98	206.585	192.033	0.23946
FBtr0070824	FBgn0029821	CG4020	0.269104	0.863092	0.603048	3.02e-09	1.37e-06	0	7.16e-09	1.62994	0	0.000220959	0	0	NA
FBtr0070825	FBgn0029822	CG12236	22.6236	21.0263	26.1315	18.729	20.5231	22.4463	22.729	25.7454	22.0917	18.1035	21.8403	21.4511	0.313625
FBtr0070826	FBgn0029822	CG12236	86.332	86.4557	87.9782	81.196	77.1712	78.7805	73.8306	78.6639	83.2766	74.5558	89.5822	86.2305	0.298932
FBtr0070827	FBgn0029823	CG3011	34.9867	39.3177	36.3147	39.8297	47.5123	55.5917	38.962	38.774	41.089	33.6855	44.9317	40.2111	0.612891
FBtr0070828	FBgn0029819	CG3016	0.562604	0.617879	0	0.299356	0	0.31361	1.13264	0.790767	0.269486	0.55647	0.884065	0.887377	0.683755
FBtr0070829	FBgn0014340	mof	57.4729	56.8366	51.3064	64.2243	62.9529	64.8604	55.1104	52.0412	60.1039	51.0693	67.735	63.0837	0.470102
FBtr0070830	FBgn0029818	GAA1	75.3241	78.6741	78.0957	77.4094	80.2017	82.8167	75.6918	83.447	73.6944	78.0492	76.6133	75.7938	0.474088
FBtr0070832	FBgn0029813	CG15766	7.56362	7.96577	4.82948	3.89741	5.2295	5.69592	4.78401	6.43011	3.77641	1.68692	5.69973	4.33709	0.311163
FBtr0070833	FBgn0029807	CG3108	0	0	0	0	0	0	0	0	0	0	0.0145414	0	NA
FBtr0070836	FBgn0029804	CG3097	0.0258818	0.0283948	0.0545449	0.0828998	0.056676	0.0577491	0.026061	0.0242555	0.0744975	0.102536	0.0272164	0.0818232	NA
FBtr0070837	FBgn0013987	MAPk-Ak2	97.5795	90.7341	87.1574	91.7588	90.0182	102.75	86.9681	89.5626	80.6584	88.1307	96.0923	98.0643	0.495592
FBtr0070839	FBgn0013987	MAPk-Ak2	18.9244	18.3234	16.1795	19.5528	18.6074	15.5238	18.6971	15.1486	15.4301	13.959	22.6109	19.4281	0.672985
FBtr0070840	FBgn0029800	lin-52	146.09	134.902	148.577	125.834	136.312	120.184	131.992	132.898	131.488	145.152	116.839	124.286	0.310355
FBtr0070841	FBgn0261383	IntS6	1.5645	3.38104	2.76401	3.74418	3.12104	5.82173	3.22104	2.27386	2.14569	3.01171	6.24136	4.16611	0.374923
FBtr0070842	FBgn0261383	IntS6	4.12016	7.55689	5.92649	11.2182	5.65251	11.2574	8.89096	9.40561	9.26931	6.03366	8.44097	12.3741	0.396805
FBtr0070843	FBgn0052758	CG32758	64.3305	72.9783	68.0875	60.3966	58.9228	62.2387	63.7993	69.1278	66.3583	60.0874	67.4515	60.8514	0.174838
FBtr0070844	FBgn0053080	CG33080	0	0	0	0	0	0	0	0	0	0	0	0	NA
FBtr0070845	FBgn0053080	CG33080	0	0	4.25e-07	0	0	0	3.44e-07	2.33e-07	0	0	0	1.16e-06	NA
FBtr0070846	FBgn0027564	CG3149	17.9625	19.2616	18.9804	21.9937	19.9987	21.0016	21.2034	25.0129	21.3961	20.3781	25.9567	25.4782	0.23946
FBtr0070847	FBgn0029789	CG3160	34.781	37.7039	38.4643	39.8632	36.7636	40.9239	37.323	38.0487	36.7315	33.4654	43.3683	40.6572	0.538084
FBtr0070848	FBgn0046687	Tre1	65.2189	69.4994	66.1155	61.3524	63.4836	62.2763	69.1808	67.2765	66.8143	68.8204	67.6934	64.383	0.44203
FBtr0070849	FBgn0015794	Rab18	88.3228	87.2524	87.5558	69.332	80.3206	81.4877	87.7255	86.3611	79.8987	88.3606	73.8392	85.1434	0.358196
FBtr0070850	FBgn0029783	Sirt4	0	0	0	0	0	0	0.681997	0	0	0	0	0	NA
FBtr0070851	FBgn0029783	Sirt4	0	0	0	0	0	0	0	0	0	0	0	0.150604	NA
FBtr0070852	FBgn0029783	Sirt4	19.594	20.5866	20.9867	14.8787	23.1895	20.9357	21.5242	26.9514	18.2352	20.1857	14.6508	18.5898	0.484004
FBtr0070858	FBgn0029824	CG3726	9.06216	9.8585	10.3826	12.7933	10.0647	8.84366	12.0717	9.32702	9.20531	8.73671	13.2715	12.3985	0.586723
FBtr0070859	FBgn0029825	CG12728	53.6964	62.7116	68.9163	32.6379	36.9723	44.7629	51.0822	56.4534	51.0575	37.2851	35.5933	34.0897	0.0088038
FBtr0070860	FBgn0052756	CG32756	58.4734	58.7452	64.8136	50.0646	53.0266	52.8271	58.1211	64.8882	63.0849	50.4752	53.2144	53.2818	0.0956363
FBtr0070861	FBgn0029826	CG6041	0.39501	0.216475	0.156329	0.0528751	0	0.330724	0.298393	0.323957	0.426961	0.293777	0.104204	0.156409	NA
FBtr0070862	FBgn0052755	CG32755	0	0	0	0	0	0	0	0.037105	0	0	0	0	NA
FBtr0070863	FBgn0029827	CG6048	0	0	0	0	0	0	0	0	0	0.0931719	0	0	NA
FBtr0070864	FBgn0029828	CG6067	0	0	0	0	0	0.0840918	0	0.0353109	0	0	0	0	NA
FBtr0070865	FBgn0029830	Grip	1.26186	2.36263	1.66413	2.74145	1.47179	1.98049	0.200712	1.21408	1.82088	1.36592	2.12496	2.15659	0.719328
FBtr0070866	FBgn0029831	CG5966	51.1388	63.7419	59.5391	42.8898	49.9143	58.1782	72.0067	65.1568	55.4284	48.2141	54.8744	37.8438	0.282845
FBtr0070867	FBgn0029833	CG5941	7.44475	8.40979	10.4046	7.35665	6.9568	10.1969	8.13751	10.0653	8.96598	5.15451	8.69034	6.59809	0.437648
FBtr0070871	FBgn0029836	CG5928	0	0	0	0	0	0	0	0	0.138637	0.0715318	0	0.0762242	NA
FBtr0070872	FBgn0029843	Nep1	0	0.0643635	0	0	0	0	1.49e-06	0	0	0	0	0	NA
FBtr0070873	FBgn0029843	Nep1	0	0	0	0	0	0	0.00691359	0	0	0	0	0	NA
FBtr0070874	FBgn0029849	Efr	39.5877	41.7813	40.515	35.5008	38.0474	36.3718	47.4134	43.1466	40.9389	35.3726	33.5957	35.3686	0.158966
FBtr0070875	FBgn0029849	Efr	0	0.258627	0.479244	0	0	0.776436	0	1.76282	0	0	0.633524	0	NA
FBtr0070877	FBgn0003514	sqh	154.912	148.514	152.201	138.745	148.99	155.143	155.282	157.807	141.456	154.302	149.904	153.234	0.451429
FBtr0070878	FBgn0029848	Btd	0	0	0	0.0288301	0	0.0602435	0.0543725	0	0	0	0	0.0853629	NA
FBtr0070879	FBgn0040069	vanin-like	0	0	0	0	0	0	0	0	0	0	0	0	NA
FBtr0070880	FBgn0052751	CG32751	0	0	0	0	0	0	0	0	0	0	0	0	NA
FBtr0070881	FBgn0052750	CG32750	0	0	0	0	0	0	0	0	0	0	0	0	NA
FBtr0070884	FBgn0026060	Mipp2	26.4335	27.9883	26.653	31.3567	24.9618	30.8563	27.0066	30.0155	25.1563	24.1843	33.5697	32.1936	0.606844
FBtr0070886	FBgn0029839	CG4660	0.0421152	0	0	0	0	0	0	0	0	0	0	0	NA
FBtr0070887	FBgn0029838	CG4666	0	0.108462	0	0.0529859	0.163188	0.331413	0.0498358	0	0.0950783	0.0981301	0.469899	0.313471	NA
FBtr0070888	FBgn0029837	Tsp5D	0	0	0	0	0	0	0	0	0	0	0	0	NA
FBtr0070889	FBgn0003302	rux	26.8295	23.2622	29.7084	26.0469	26.6797	24.1386	28.1603	27.7864	20.7424	28.3993	26.9171	16.828	0.589081
FBtr0070890	FBgn0029003	mab-21	0	0.0269441	0.0258754	0	0	0	0	0	0	0	0	0	NA
FBtr0070891	FBgn0027546	CG4766	0	0	0	0	0	0	0	0	0	0	0	0	NA
FBtr0070892	FBgn0005390	fs(1)M3	74.5712	83.1024	67.6032	85.7009	101.204	99.1146	81.6327	82.9208	98.5491	92.7815	89.6319	93.8542	0.168339
FBtr0070893	FBgn0029851	CG14445	0	0	0	0	0	0	0	0	0	0	0	0	NA
FBtr0070894	FBgn0015818	Spx	90.328	89.9474	84.7386	99.329	96.2852	91.3264	81.7806	82.5116	84.1047	78.9488	103.458	102.703	0.580702
FBtr0070895	FBgn0029853	CG3781	41.2898	36.5009	39.2369	36.2268	38.1181	33.4413	39.2122	37.4842	35.3777	38.3861	34.081	34.3949	0.402273
FBtr0070896	FBgn0028982	Spt6	17.3323	15.2281	12.5023	24.2416	16.1938	13.25	8.97267	10.2086	16.1299	13.7147	26.9763	22.9116	0.480592
FBtr0070897	FBgn0029857	wuho	59.8939	58.5555	54.4749	52.8372	58.8827	64.9041	57.311	63.848	53.2775	56.1318	53.8757	62.5997	0.526517
FBtr0070898	FBgn0029858	CG15896	26.926	27.3725	24.7894	24.4775	24.2544	24.3587	22.4865	24.62	23.8577	21.799	22.8709	25.2095	0.292464
FBtr0070899	FBgn0029861	CG3815	74.1492	75.2621	69.4975	74.7909	67.4682	77.0981	66.7581	68.4031	69.9024	54.9312	87.6876	77.7779	0.87695
FBtr0070900	FBgn0029863	CG3823	0	0	0	0	0	0	0	0.0392289	0	0	0	0	NA
FBtr0070901	FBgn0029864	CG15894	0	0	0	0	0	0	0	0	0	0	0	0	NA
FBtr0070903	FBgn0029866	CG3842	0	0	0	0.260171	0	0	0	0	0	0	0.26688	0	NA
FBtr0070904	FBgn0029866	CG3842	23.0282	18.0108	45.3328	25.5922	35.8693	38.8916	32.5713	31.7383	33.2763	34.9557	38.0095	32.3275	0.522086
FBtr0070905	FBgn0029867	CG3847	136.822	127.264	129.465	139.994	135.961	130.731	144.774	128.56	116.966	135.188	161.356	154.841	0.390616
FBtr0070906	FBgn0261955	kdn	0	0	0	0	0.193752	0.195295	0	0	0	0.167675	0	0.175821	NA
FBtr0070907	FBgn0261955	kdn	126.06	127.109	130.982	156.05	140.673	135.248	160.112	154.416	130.895	147.976	173.35	183.136	0.113311
FBtr0070909	FBgn0029870	Marf	6.14903	16.8076	3.38519	3.07463	6.41233	6.00948	16.249	12.6427	6.02795	6.39254	3.98003	5.76741	0.806414
FBtr0070910	FBgn0029870	Marf	107.627	111.548	132.001	113.732	100.43	116.762	99.7077	108.666	113.454	96.5773	126.174	119.838	0.531089
FBtr0070911	FBgn0052748	tRNA:CR32748	0	0	0	0	0	0	0	0	0	0	0.502724	0	NA
FBtr0070912	FBgn0029873	CG3918	120.73	121.754	120.524	116.507	112.325	122.232	115.413	111.911	103.662	102.036	122.4	117.511	0.31492
FBtr0070913	FBgn0014031	Spat	0.225699	0.371242	0.595022	0.723992	0.907934	1.2174	1.25011	1.12816	0.469512	0.782854	1.22835	1.62686	0.32535
FBtr0070914	FBgn0000524	dx	107.093	110.424	114.532	115.611	102.987	115.388	98.2632	105.281	107.872	93.5615	137.324	123.783	1
FBtr0070915	FBgn0014026	RpL7A	216.044	245.806	270.14	357.158	342.255	310.898	200.233	291.904	325.354	253.267	375.776	383.824	0.174659
FBtr0070916	FBgn0014026	RpL7A	13.8881	9.97285	16.857	36.3801	25.6189	25.0113	4.30151	14.5152	20.9805	24.8317	19.5852	32.0154	0.139392
FBtr0070918	FBgn0029874	CG3342	32.5721	30.4707	32.4639	32.4914	32.4848	34.0564	33.6179	30.6125	32.7815	34.0605	35.2359	34.0864	0.452932
FBtr0070921	FBgn0003139	PpV	95.6354	100.653	101.085	95.3092	91.6927	87.3687	81.9119	82.1822	97.3651	85.472	83.6254	85.6975	0.182469
FBtr0070922	FBgn0003655	swa	479.377	490.842	502.551	429.312	438.973	447.376	489.914	487.16	450.151	454.767	457.127	453.31	0.1911
FBtr0070923	FBgn0016974	swaPsi	0	0	0	0.000509726	2.35e-05	0	4.03e-09	0.147776	0	0	0	0	NA
FBtr0070924	FBgn0029868	CG3446	2.1432	2.13979	2.45947	1.24404	2.76169	3.47631	3.13884	3.46879	4.293	3.30546	3.89839	5.76191	0.503799
FBtr0070925	FBgn0043796	CG12219	70.276	68.2121	65.5125	63.8014	65.5382	71.4307	64.4454	72.0008	67.571	64.2433	70.6095	74.5091	0.463709
FBtr0070926	FBgn0029859	CG15892	0	0	0	0	0	0	0	0.0758338	0	0.0688497	0	0	NA
FBtr0070930	FBgn0026015	Top3beta	57.8064	59.5078	61.92	64.0142	57.0637	74.6325	57.3081	57.0121	53.5667	52.7341	79.4011	74.6565	0.556388
FBtr0070932	FBgn0052745	CR32745	0	0	0.15972	0	0	0	0	0	0	0.151237	0	0.158118	NA
FBtr0070933	FBgn0086558	Ubi-p5E	1578.68	1583.61	1503.49	1487.61	1566.65	1577.6	1637.95	1700.6	1467.73	1678.61	1650.16	1718.42	0.402273
FBtr0070937	FBgn0040918	schlank	54.4124	64.3847	58.0849	40.9136	47.3272	53.4374	66.025	64.5574	56.319	50.7924	36.3378	46.5472	0.149638
FBtr0070938	FBgn0040918	schlank	54.98	49.9586	56.1125	70.6841	61.154	64.1459	50.2367	56.327	67.1546	55.9644	72.0573	70.5587	0.174659
FBtr0070943	FBgn0029877	CG17717	0	0.224624	0.108164	0	0.169044	0.114406	0	0	0.246176	0.0508148	0	0.270557	NA
FBtr0070944	FBgn0029877	CG17717	0.201055	0	0	0.107663	0	0	0.354386	0.800898	0	0	0.212181	0	NA
FBtr0070945	FBgn0029878	Pat1	4.28235	4.99256	2.76301	0.782846	5.59091	6.1799	3.43574	1.02584	1.88478	4.81209	4.70418	3.93212	0.939413
FBtr0070946	FBgn0029879	APC7	142.045	135.757	160.295	137.096	143.665	155.366	147.964	150.513	153.686	146.208	131.638	131.011	0.47815
FBtr0070947	FBgn0029879	APC7	3.21244	3.08546	2.88439	7.17613	4.40256	4.30352	13.7671	3.82087	10.3969	5.41027	5.08412	3.01776	0.532571
FBtr0070948	FBgn0029881	pigs	6.6461	9.04996	5.75463	7.58544	7.26246	6.72812	6.53098	4.62169	7.5549	5.79381	12.1185	6.59251	1
FBtr0070950	FBgn0028360	l(1)G0148	142.307	157.557	166.009	141.141	134.45	145.448	150.064	153.003	154.264	129.241	153.613	144.345	0.195064
FBtr0070951	FBgn0062413	Ctr1A	2.39866	1.91502	1.43347	2.18193	3.43668	1.26907	1.85281	1.68016	3.33919	1.99691	3.40178	2.96004	0.53315
FBtr0070952	FBgn0025815	Mcm6	168.686	185.854	171.578	180.937	167.278	182.234	160.821	163.438	162.392	161.661	208.191	179.48	0.523938
FBtr0070953	FBgn0028336	l(1)G0255	188.434	208.548	217.54	197.436	191.963	203.514	205.14	202.845	201.777	192.485	204.813	203.28	0.398663
FBtr0070954	FBgn0028336	l(1)G0255	10.328	2.74222	3.01302	1.65076	2.60606	2.88913	4.62955	2.50759	5.27904	1.88014	3.58325	2.89846	0.421438
FBtr0070955	FBgn0029890	CG4095	0.0633727	0.208462	0.0668222	0.0676893	0.0347232	0.10607	0.223284	0.0297125	0.0608315	0.0941771	0.266788	0.200511	NA
FBtr0070956	FBgn0029891	Pink1	0	0	0	0	0	0	0	0	0	0	0	0	NA
FBtr0070957	FBgn0029891	Pink1	13.0606	21.2827	16.7067	18.0485	17.7697	7.0427	14.779	19.9404	19.6657	5.99021	13.3409	13.5026	0.589964
FBtr0070959	FBgn0029895	CG14441	1.14946	1.64142	1.06027	2.28337	2.30973	2.25383	1.07239	1.16376	1.49642	0.967866	2.20106	2.13272	0.441572
FBtr0070960	FBgn0029898	CG14439	0	0	0.0256893	0	0.0266888	0.0544001	0.0982009	0.0685488	0.0935651	0	0.179434	0.0256905	NA
FBtr0070961	FBgn0029899	CG14438	3.46037	2.88582	2.12799	4.0086	3.05177	3.5265	3.18084	2.92357	3.48212	2.87105	6.01041	6.15714	0.309275
FBtr0070962	FBgn0029899	CG14438	55.389	61.2367	59.9477	77.148	54.2607	80.3244	56.7833	55.4112	56.7402	55.0936	98.0559	76.7109	0.44203
FBtr0070963	FBgn0029502	COQ7	101.293	96.0173	94.3898	79.4631	91.4417	77.8575	98.4136	99.6825	85.0731	95.1897	74.116	84.9155	0.251205
FBtr0070964	FBgn0029903	pod1	68.2319	71.7471	72.6438	81.0043	72.1943	79.9442	68.7107	66.8464	59.0515	58.5939	93.8659	86.6752	0.650468
FBtr0070965	FBgn0029903	pod1	3.18591	1.40335	1.68716	3.70397	0.987942	4.06917	2.79966	2.02138	3.72272	3.34273	3.32092	2.57855	0.607737
FBtr0070966	FBgn0029903	pod1	6.83e-10	1.80626	0.426819	1.95892	1.31e-08	0.500136	0.862794	0	1.46e-09	2.78e-10	0.42066	0	0.709904
FBtr0070967	FBgn0029903	pod1	0.234459	0.279626	0	0.248844	0.530828	0.514636	0.680622	0.413144	0	0	0.228042	0.939773	0.785501
FBtr0070968	FBgn0029903	pod1	0.823718	0	0.802948	0	0	0.34806	0	0	0.271026	0.26446	0	0	NA
FBtr0070969	FBgn0086693	iav	0.0282488	0	0.0148718	0.0451733	0	0	0.0426605	0.0794161	0	0	0.0444814	0.0297393	NA
FBtr0070970	FBgn0029906	xit	16.9626	19.5126	17.4112	17.546	18.5913	20.1698	17.0812	18.7605	18.9685	16.553	20.7333	18.5888	0.492865
FBtr0070972	FBgn0263968	nonC	4.39334	6.03048	4.89361	8.1692	4.79414	6.65255	4.44754	3.44598	6.15914	5.04705	9.3986	9.71656	0.352992
FBtr0070973	FBgn0029909	CG12796	0.221774	0	0.0935897	0.237338	0.0487194	0.148525	0.134016	0.0831439	0	0.0879441	0.140306	0.140443	NA
FBtr0070974	FBgn0029905	Nf-YC	93.1886	105.509	104.184	101.575	96.3893	105.999	93.6842	97.7545	90.7403	75.4652	122.253	109.133	1
FBtr0070978	FBgn0003390	shf	0	0.20575	0	0	0	0	0	0	0	0	0	0	NA
FBtr0070979	FBgn0052740	tRNA:CR32740	0	0	0	0	0	0	0	0	0	0	0.502724	0	NA
FBtr0070980	FBgn0029897	RpL17	1695.27	1853.38	1788.73	1546.86	1582.43	1677.76	1712.3	1759.93	1795.54	1756.35	1559.63	1714.88	0.290536
FBtr0070981	FBgn0029897	RpL17	71.1984	58.265	57.5484	75.7512	75.3177	60.094	47.9044	62.375	61.8814	76.7344	91.1021	72.4539	0.341671
FBtr0070982	FBgn0029897	RpL17	2.81549	2.48802	1.47574	3.78243	2.83169	1.90604	1.60651	1.78988	2.88254	3.32291	3.60904	4.69244	0.465396
FBtr0070983	FBgn0029897	RpL17	22.58	9.53982	29.194	45.6573	57.1957	28.5657	37.797	40.0769	29.2097	44.7918	27.4208	52.2707	0.400401
FBtr0070984	FBgn0029896	CG3168	0	0	0	0	0	0	0	0	0	0	0	0	NA
FBtr0070985	FBgn0029896	CG3168	0	0	0	0	2.3e-10	0.0168601	0	0	0	0	0	0	NA
FBtr0070986	FBgn0029896	CG3168	0	0	0	0	0.0335552	0	0	0	0	0	0	0	NA
FBtr0070987	FBgn0029894	CG14440	34.6541	39.8924	37.2246	35.7411	35.2032	35.4619	38.7344	42.2452	41.9153	35.563	38.2606	40.4723	0.476701
FBtr0070988	FBgn0029893	CG14442	63.1465	66.0092	54.6565	68.5704	64.7238	69.6485	55.4849	64.5513	57.154	45.9856	75.5315	71.8382	1
FBtr0070989	FBgn0029892	CG3184	21.1277	22.05	19.864	17.4417	20.1283	23.789	21.3718	26.3167	17.2001	20.9015	16.2146	18.4638	0.448614
FBtr0070990	FBgn0029888	CG3192	1.15951	1.44322	1.0571	1.23393	1.34037	1.12044	0.856023	0.724592	1.11121	1.42984	1.58427	1.6263	0.611264
FBtr0070991	FBgn0029887	CG3198	20.791	19.833	18.9546	18.7792	19.0941	19.0639	18.7894	17.756	17.6647	17.7436	20.629	20.6215	0.429168
FBtr0070992	FBgn0029885	CG3224	111.698	106.38	117.951	93.6813	105.404	102.832	108.723	116.084	99.5832	100.222	88.7765	106.852	0.190117
FBtr0070993	FBgn0029882	CG3226	386.837	364.904	382.646	363.848	383.723	367.117	381.047	380.66	386.468	421.922	336.848	346.784	0.599842
FBtr0070994	FBgn0029912	CG4557	41.5348	44.3896	41.1958	48.5463	45.0077	50.2318	40.0534	42.3498	42.5519	37.3271	51.192	49.9272	0.571999
FBtr0070995	FBgn0029914	CG4558	3.27582	4.32455	3.95168	3.93546	3.44849	4.50892	3.0616	3.49219	3.53746	5.74051	5.92438	3.54124	0.564652
FBtr0071001	FBgn0052733	CR32733	0.289474	0	0	0	0	0	0	0	0	0.14423	0.154899	0	NA
FBtr0071003	FBgn0029924	CG4586	148.809	156.901	147.443	161.48	151.611	161.24	145.192	141.562	156.819	155.836	175.381	161.797	0.421931
FBtr0071004	FBgn0261284	bou	18.4419	23.5476	10.6578	10.0116	25.1208	31.5754	12.129	14.3272	8.87824	18.152	11.6838	12.2075	1
FBtr0071005	FBgn0027108	Inx2	68.6118	75.3562	73.5252	84.7661	84.6362	85.5851	74.1541	68.5692	70.5762	71.6506	96.3802	87.0205	0.250242
FBtr0071006	FBgn0027108	Inx2	0.957319	1.8323	1.60121	2.40182	2.13319	1.80648	1.26689	1.64318	1.31345	1.18669	1.79353	1.2947	0.697137
FBtr0071007	FBgn0052736	CG32736	4.21122	4.97728	5.5726	5.26769	6.59681	8.19386	5.5169	7.11346	3.98308	5.6263	6.71004	4.81901	0.601743
FBtr0071008	FBgn0052736	CG32736	27.3054	26.5701	27.0616	22.228	18.7184	18.027	21.9648	22.4018	20.332	22.4474	20.7094	19.772	0.212028
FBtr0071009	FBgn0029929	CG4593	1.6253	1.78498	1.70971	0.432402	1.32872	0.226496	0.613516	0.761479	1.55703	0.401895	4.04378	2.56353	0.663759
FBtr0071010	FBgn0029931	CG14427	0	0	0.19656	0.0498531	0	0	0	0	0	0	0	0	NA
FBtr0071013	FBgn0029932	CG4607	0	0	0	0	0	0	0	0	0	0	0	0	NA
FBtr0071014	FBgn0029932	CG4607	0	0	0	0	0	0	0	0	0	0	0	0	NA
FBtr0071015	FBgn0029937	CG8300	52.2841	50.0588	57.8789	50.9364	52.0693	54.5957	55.3041	58.758	57.7905	56.755	52.9606	55.4935	0.485252
FBtr0071016	FBgn0047092	CR32730	0.0278043	0	0	0.029693	0	0	0	0	0.08004	0	0.0292462	0	NA
FBtr0071017	FBgn0027342	fz4	0.266257	0.426646	0	0	0	0	0	0	0	0	0	0	NA
FBtr0071018	FBgn0027342	fz4	69.9524	82.2366	80.8711	79.9984	77.1812	84.8247	79.5696	84.8617	81.864	78.9015	87.779	85.3176	0.45875
FBtr0071019	FBgn0029936	CG4617	42.2171	41.0831	41.8373	35.2942	31.2157	34.2486	42.9497	47.1175	40.456	43.0645	37.396	40.3563	0.426793
FBtr0071020	FBgn0029935	CG4615	57.1477	54.6163	55.0359	55.8757	53.2834	56.7299	55.4733	58.41	54.2069	55.2346	64.1457	61.0733	0.461542
FBtr0071032	FBgn0029928	CG3032	8.42047	8.61472	6.76911	6.49164	8.62016	8.65725	10.0786	10.1177	8.6799	10.5447	7.6416	10.7671	0.585815
FBtr0071033	FBgn0000330	cm	55.3096	53.1273	55.2759	58.4887	61.4126	62.3234	60.5971	59.5052	62.2304	61.1118	55.6359	62.2012	0.444425
FBtr0071034	FBgn0027106	Inx7	0	0	0	0	0	0	0	0	0	0	0	0	NA
FBtr0071035	FBgn0027106	Inx7	0.862732	1.19159	0.505249	0.614548	0.70044	1.03395	0.804414	0.329408	0.797381	0.601481	0.739872	0.471653	0.618316
FBtr0071036	FBgn0004646	ogre	2.39601	2.43355	0.953564	3.32272	2.19577	2.81905	3.42184	1.22692	2.40484	2.16668	1.68821	3.18845	0.544212
FBtr0071037	FBgn0004646	ogre	0	0	0	0	0	0	0	0.394217	0.449337	0	0	0	NA
FBtr0071038	FBgn0029925	CG3040	65.4067	61.813	65.2348	60.3585	61.4612	61.1852	67.5384	65.164	60.8717	64.4067	58.066	61.9553	0.413971
FBtr0071039	FBgn0052732	CG32732	83.7889	91.7548	94.2716	82.868	84.1474	89.7936	88.0115	88.5934	85.3007	75.5438	88.245	90.204	0.32201
FBtr0071040	FBgn0029915	CG14434	135.657	138.368	135.438	126.15	133.607	122.518	141.938	142.182	138.6	141.78	119.768	111.256	0.37067
FBtr0071041	FBgn0029913	Cht11	29.7248	29.9755	27.8668	28.4614	28.6868	27.8259	29.9332	26.9856	31.6597	30.802	27.7561	26.891	0.460072
FBtr0071042	FBgn0029911	CG14435	68.802	68.2757	71.8666	72.2826	65.4926	70.0687	65.2992	69.9173	74.7293	69.3591	81.7628	75.9516	0.48206
FBtr0071046	FBgn0029940	CG1958	0.114031	0	0	0	0	0	0	0	0	0	0	0	NA
FBtr0071047	FBgn0029942	CG2059	2.49018	4.51622	0.874428	1.80682	4.6268	2.77364	1.67766	0	4.02033	3.35869	4.15868	5.22097	0.697796
FBtr0071048	FBgn0024250	brk	0	0	0.016425	0.016633	0.0170481	0.0174001	0	0.0146207	0.0149584	0.0154405	0.0163786	0.016425	NA
FBtr0071049	FBgn0029944	Dok	87.1451	90.9034	94.7685	80.2071	79.581	81.4316	89.0541	86.5447	85.1645	85.2865	90.7652	88.6727	0.306142
FBtr0071051	FBgn0029945	CG18155	0.125052	0.0274397	0.105411	0	0.0547595	0.0279017	0.0251833	0	0.0239952	0.0247697	0.0525933	0.0263542	NA
FBtr0071052	FBgn0026144	CBP	87.5574	89.766	90.9932	86.6826	91.3071	85.5959	88.6731	88.241	86.9091	78.278	97.8039	91.7011	0.455574
FBtr0071053	FBgn0026144	CBP	0	0.168016	0	0	0	0.298973	0.146417	0.423737	0.514003	0.137671	0.25173	0.133894	0.542726
FBtr0071054	FBgn0029947	CG1999	0	0	0	0.161667	0	0	0	0	0	0	0	0	NA
FBtr0071055	FBgn0029948	CheA7a	0	0	0	0	0	0	0	0	0	0	0	0	NA
FBtr0071056	FBgn0265265	CG32727	0	0	0	0	0	0	0	0	0	0	0	0	NA
FBtr0071057	FBgn0029950	CG9657	0	0	0	0	0	0	0	0	0.023907	0	0	0	NA
FBtr0071058	FBgn0040923	CG11368	0	0	0	0	0	0	0	0	0	0	0	0	NA
FBtr0071059	FBgn0052726	CG32726	0	0	0	0	0	0	0	0	0	0	0	0	NA
FBtr0071060	FBgn0040922	CG15036	0	0	0	0	0	0	0	0	0	0	0	0	NA
FBtr0071063	FBgn0029949	CG15035	0	0	0	0	0	0	0	0	0	0	0	0	NA
FBtr0071064	FBgn0029946	CG15034	0	0	0	0.0788264	0.081005	0	0	0	0	0	0	0	NA
FBtr0071065	FBgn0029943	Atg5	45.9772	52.7541	48.9177	45.3632	50.3174	52.3523	50.518	50.0274	48.4138	51.3427	46.0671	45.3042	0.486805
FBtr0071066	FBgn0025549	unc-119	99.0721	102.32	108.595	93.4929	94.2897	96.545	97.0444	103.545	100.37	103.474	103.288	107.179	0.446627
FBtr0071067	FBgn0029951	CG11369	0.0203876	0	0	0	0	0	0	0	0	0	0	0	NA
FBtr0071068	FBgn0004198	ct	0.00461921	0.0253604	0.0048606	0	0	0	0	0	0.00442638	0	0.0242115	0.0340133	NA
FBtr0071070	FBgn0022786	Hira	59.7988	62.1127	65.0135	65.2553	63.0129	69.025	65.2338	64.9646	70.563	66.8237	71.5128	71.9453	0.365355
FBtr0071071	FBgn0029957	CG12155	64.6945	67.2404	66.385	61.4083	66.0625	64.3379	67.9802	70.1442	66.0453	69.1062	63.322	67.4053	0.465396
FBtr0071072	FBgn0029959	Rab39	39.9652	40.8794	40.276	37.3886	38.3675	40.2976	38.4733	41.5935	39.621	41.5713	30.1473	43.471	0.527256
FBtr0071073	FBgn0016041	Tom40	294.797	301.983	314.342	263.507	277.003	273.141	312.693	322.311	295.599	297.799	280.274	283.966	0.254581
FBtr0071074	FBgn0016041	Tom40	0	0	0	0	0	0	0	0	0	0	0	0.1613	NA
FBtr0071075	FBgn0029961	Ir7a	0	0	0	0	0	0	0	0	0	0	0	0	NA
FBtr0071076	FBgn0029958	Pdp	65.2786	54.3752	46.7606	51.0528	62.0678	56.7809	58.3836	62.2968	48.432	72.7384	42.8624	54.7423	1
FBtr0071077	FBgn0027553	NELF-B	60.5505	60.2178	59.0712	50.9862	59.2832	53.3691	55.3747	62.4428	52.9981	60.3912	53.3373	52.4016	0.3161
FBtr0071078	FBgn0029955	CG15478	0	0	0	0	0	0	0	0.0250407	0.025509	0	0	0	NA
FBtr0071079	FBgn0029504	CHES-1-like	20.6009	24.051	21.8269	23.7705	23.1953	31.7687	27.6247	27.9541	22.7832	21.1529	28.6289	31.2224	0.413852
FBtr0071081	FBgn0029952	CG12689	0	0	0	0	0	0	0	0	0	0	0	0	NA
FBtr0071083	FBgn0052719	CG32719	0.0487739	0.0267696	0.0641853	0.0779763	0.119872	0.149582	0.0245517	0.0114264	0.0233793	0.144818	0.102372	0.128347	0.478096
FBtr0071087	FBgn0029966	Ir7c	0	0	0	0	0	0	0	0	0	0	0	0.0503714	NA
FBtr0071088	FBgn0029968	Ir7g	0	0	0	0	0	0	0	0	0	0.0305861	0	0	NA
FBtr0071089	FBgn0040087	p115	31.8008	32.4378	33.7104	36.7937	34.1173	39.0259	34.3913	33.2078	35.4422	37.8167	39.4559	37.0171	0.29821
FBtr0071090	FBgn0010292	bys	103.861	96.3837	108.847	95.4183	105.263	94.8993	106.859	106.888	97.3064	104.389	92.0613	99.6991	0.457143
FBtr0071091	FBgn0029975	CG1444	185.609	181.045	175.935	150.587	160.576	148.227	178.919	179.638	159.517	186.684	140.402	157.379	0.298451
FBtr0071092	FBgn0029976	snz	36.3936	42.7777	41.03	34.0123	33.403	40.9148	40.1939	43.237	37.4162	33.6726	38.0782	37.0946	0.219293
FBtr0071093	FBgn0260858	Ykt6	102.389	98.8058	100.459	94.7812	95.5482	95.2898	109.082	97.5101	96.6057	97.6863	96.8141	98.5137	0.376496
FBtr0071094	FBgn0004403	RpS14a	1154.63	1225.27	1201.14	1029.97	1082.88	1142.05	1176.11	1255.97	1169.37	1180.69	1040.55	1050.18	0.197692
FBtr0071095	FBgn0004403	RpS14a	6.682	7.87245	7.18825	5.48041	7.7368	9.10494	4.14807	6.67796	4.46316	7.39248	4.34296	6.48367	0.574706
FBtr0071096	FBgn0004404	RpS14b	397.217	469.897	431.917	420.05	433.464	487.574	440.238	521.017	448.759	411.135	365.323	356.037	0.44734
FBtr0071099	FBgn0029987	CG15330	0	0	0	0.31168	0	0	0	0.0904401	0	0.0958833	0.102492	0.102255	NA
FBtr0071101	FBgn0003447	sn	6.57803	8.20417	8.36445	4.79963	2.95491	4.71317	12.5813	4.41009	7.05559	4.94535	1.40295	4.03694	0.215701
FBtr0071102	FBgn0003447	sn	73.8408	78.8588	77.8045	84.2505	79.0861	84.0468	66.5075	75.575	74.2147	73.8315	93.8509	90.9155	0.421803
FBtr0071105	FBgn0004657	mys	43.1541	52.9784	46.4586	49.6758	42.2448	58.4986	47.2023	52.3497	41.2809	40.6855	61.2922	59.5449	0.72664
FBtr0071106	FBgn0029993	CG1571	0	0	0	0	0	0	0	0	0	0	0	0.0232419	NA
FBtr0071107	FBgn0040319	Gclc	52.9774	58.5394	55.2619	52.0275	45.4381	53.9204	60.6449	60.5639	55.895	51.4578	62.4083	66.3791	1
FBtr0071108	FBgn0040319	Gclc	0	7.41e-07	0.00732949	0	1.07e-07	6.79e-10	0.000249821	3.98e-05	1.58e-10	4.71e-08	0	7.13e-07	NA
FBtr0071109	FBgn0029997	CG2258	20.0635	20.4987	19.3398	15.5727	17.647	18.6831	17.9276	18.003	13.7055	13.3674	18.0574	17.1976	0.13589
FBtr0071110	FBgn0029997	CG2258	2.45826	2.83843	1.95173	3.40855	2.60532	2.87183	1.82431	1.74206	2.03771	1.57415	3.69512	1.98586	1
FBtr0071111	FBgn0029997	CG2258	11.2434	11.126	12.5215	14.146	12.3675	15.2592	12.8738	13.2963	12.309	12.0984	16.8868	14.7002	0.299247
FBtr0071112	FBgn0029996	UbcE2H	140.667	138.169	123.938	149.838	153.272	156.621	124.3	132.284	125.146	122.085	169.546	142.431	0.612493
FBtr0071113	FBgn0029996	UbcE2H	56.0383	42.9668	52.594	68.1686	60.4797	55.783	47.9847	37.7495	44.0328	40.8996	68.9685	63.2569	0.607246
FBtr0071114	FBgn0029996	UbcE2H	119.738	133.315	105.203	140.242	123.121	130.087	105.132	110.378	113.918	101.234	155.871	146.837	0.634208
FBtr0071116	FBgn0029994	CG2254	0	0	0	0.0404146	0	0	0.114189	0	0	0	0	0.079739	NA
FBtr0071117	FBgn0029992	Upf2	19.732	22.8685	19.4002	21.9997	19.8497	22.8209	22.3587	19.457	20.7618	18.172	27.6575	25.7258	0.603831
FBtr0071118	FBgn0004656	fs(1)h	1.59577	1.01511	1.41628	3.55735	2.23081	1.85275	1.81293	1.12301	1.97363	1.35847	4.17399	3.14887	0.255004
FBtr0071119	FBgn0004656	fs(1)h	68.3432	76.6243	68.8457	99.6821	75.5838	103.359	71.5272	64.8019	64.001	59.9262	133.872	108.661	0.421803
FBtr0071120	FBgn0004656	fs(1)h	0.185119	0.11506	0.382052	0.63067	0.246239	0	0	0.0739969	0.206162	0.184021	0.504784	0.750714	1
FBtr0071121	FBgn0004656	fs(1)h	3.804	4.48165	3.47915	7.15038	5.27243	6.345	3.51129	3.41989	4.73061	3.634	7.8121	6.26853	0.297417
FBtr0071122	FBgn0004656	fs(1)h	0.475576	0.694331	1.30829	0.825233	0.631179	0.706233	0.27069	0.683556	0.483206	0.836449	1.51749	0.563675	0.92811
FBtr0071123	FBgn0029990	CG2233	0.534634	1.05536	0.450977	0.876331	0.703629	0.596611	0.430719	0.400853	0.581687	0.423825	0.750676	0.338318	0.628953
FBtr0071124	FBgn0029989	CG15333	0	0	0	0	0	0	0.0285486	0	0	0	0	0	NA
FBtr0071125	FBgn0003656	sws	54.1328	71.6318	58.2581	71.1116	61.9654	81.7267	66.4811	63.3194	66.2736	52.9205	99.2866	82.6547	0.4691
FBtr0071126	FBgn0003656	sws	2.5401	3.29531	2.01978	2.4672	3.6827	5.64663	2.0079	1.46819	4.48	3.55063	5.19796	7.98088	0.246235
FBtr0071127	FBgn0029986	CG15332	0.102412	0.112357	0.161869	0.136673	0.0280314	0.228507	0.180462	0.16796	0.221082	0.0507149	0.0807664	0.21584	NA
FBtr0071129	FBgn0027280	l(1)G0193	54.5901	62.8868	55.422	54.1501	49.0406	55.7915	57.2396	55.7675	46.8299	44.887	67.5395	57.1992	0.52605
FBtr0071130	FBgn0027280	l(1)G0193	10.7402	12.0252	12.3891	12.3248	10.6382	11.5832	11.3564	10.4221	11.601	9.27145	11.6343	12.9918	0.494748
FBtr0071131	FBgn0029980	CG10778	35.9665	33.4775	41.6702	56.99	66.0622	47.4419	49.1429	53.0997	51.2959	49.9915	51.0671	58.5772	0.134221
FBtr0071132	FBgn0029979	CG10777	10.4391	12.6771	13.8339	13.6374	10.882	12.735	10.6531	12.3678	11.2191	9.56575	14.1035	11.4059	0.693334
FBtr0071133	FBgn0029977	hdm	0.0723147	0.118954	0	0.0773089	0	0.282446	0.0364121	0	0.242987	0.0716601	0.152316	0.114407	NA
FBtr0071134	FBgn0029974	dpr14	0.294302	0.332358	0.17404	0	0.0835395	0.0745639	0.269556	0.17968	0.0929408	0.238677	0.108479	0.221204	0.5891
FBtr0071135	FBgn0261592	RpS6	2245.91	2334.52	2230.44	1968.94	2049.58	2026.33	2093.45	2254.32	2174.36	2137.94	2001.53	2088.27	0.206965
FBtr0071136	FBgn0261592	RpS6	0.296882	0.658323	0.947299	1.07964	1.11082	1.30925	0.901676	0.696405	1.12847	0.725918	1.21339	0.155192	0.728193
FBtr0071140	FBgn0029971	CG18624	162.741	155.99	158.124	142.295	161.533	135.142	168.416	169.227	156.301	162.663	153.744	148.203	0.430881
FBtr0071141	FBgn0029971	CG18624	8.62347	5.66325	7.42076	7.52668	7.93273	8.93777	4.5331	6.30458	7.12696	8.28442	5.78546	5.26187	0.6453
FBtr0071142	FBgn0029970	Nek2	72.575	81.6776	78.0465	71.3832	70.4916	75.2686	84.238	82.815	77.8274	78.487	84.8204	81.1688	0.501479
FBtr0071143	FBgn0029969	CG10932	109.47	114.8	108.28	131.434	144.091	147.822	153.117	125.01	148.156	152.864	125.714	139.875	0.151156
FBtr0071145	FBgn0000427	2017-12-01	0	0	0	0	0	0	0	0	0	0	0	0	NA
FBtr0071146	FBgn0000427	2017-12-01	0	0	0	0	0	0	0	0	0	0	0	0	NA
FBtr0071147	FBgn0000427	2017-12-01	0	0	0	0	0	0	0	0	0	0	0	0	NA
FBtr0071150	FBgn0029963	CG10920	0	0	0	0	0	0	0	0	0	0	0	0	NA
FBtr0071151	FBgn0029999	CG1575	48.2292	48.786	44.1291	39.1301	40.5532	46.2198	41.3748	43.6269	37.3905	34.6402	40.0303	43.5704	0.175692
FBtr0071152	FBgn0030003	CG2116	90.6896	86.1541	87.0028	79.6201	85.7565	84.4444	89.1152	92.6043	84.1155	84.1481	79.6786	86.7075	0.341671
FBtr0071153	FBgn0030004	CG10958	1.04944	0.88432	0.789507	0.459773	0.307398	0.77341	0.924542	1.05371	0.503236	0.556612	0.413401	1.0263	0.465396
FBtr0071155	FBgn0030008	CG2129	54.3043	52.9706	54.3284	49.5926	50.8284	52.9851	53.8867	60.5844	54.6611	55.4439	50.4205	54.4925	0.44203
FBtr0071157	FBgn0030010	CG10959	50.1878	47.5572	46.6793	43.837	47.1672	44.6841	50.3633	51.1852	41.4764	52.6369	40.3289	44.3587	0.481412
FBtr0071158	FBgn0030012	CG18262	30.0136	32.0853	29.3437	29.8154	30.622	29.4378	34.1142	34.0082	29.6012	32.1579	27.7362	31.9957	0.484131
FBtr0071160	FBgn0030014	CG15337	0.0740608	0	0.0390486	0	0.0406227	0	0	0	0	0	0.156014	0	NA
FBtr0071166	FBgn0030025	CG2147	121.424	123.034	129.572	110.161	124.796	119.265	121.451	129.578	120.607	117.445	108.363	115.866	0.31082
FBtr0071167	FBgn0020653	Trxr-1	337.514	343.041	361.347	355.517	351.177	372.251	363.683	365.321	360.783	328.006	383.872	381.342	0.442398
FBtr0071168	FBgn0020653	Trxr-1	75.3699	79.9054	80.3563	72.9805	73.8636	88.2522	72.3846	82.5235	63.9744	64.6538	85.2345	86.7239	0.663607
FBtr0071169	FBgn0020653	Trxr-1	17.8677	16.6627	14.9949	16.4787	14.5656	13.0581	14.2787	14.1621	19.9213	18.5018	22.2709	20.4899	0.717899
FBtr0071170	FBgn0030027	CG1632	0	0	0	0	0	0	0	0	0	0	0	0	NA
FBtr0071171	FBgn0030030	CG1636	23.5407	22.3288	24.8731	25.5806	21.6013	25.9106	22.5882	20.85	22.912	22.5748	33.2678	24.0495	0.604755
FBtr0071173	FBgn0030033	CG1387	0	0	0	0	0	0	0	0	0	0	0	0.01526	NA
FBtr0071174	FBgn0030034	CG10555	81.1732	84.472	74.5367	105.425	98.2015	114.059	89.596	81.4563	74.9904	74.336	128.157	111.046	0.304798
FBtr0071175	FBgn0030035	CG11190	51.5676	56.6758	51.3863	56.4044	53.492	59.1066	52.6465	54.629	53.5686	52.1086	59.6063	58.6377	0.457143
FBtr0071176	FBgn0040928	CG15345	44.8151	39.0716	40.7796	33.1921	37.3626	41.2682	41.2625	44.1406	38.0007	36.6088	39.6552	40.4269	0.385532
FBtr0071178	FBgn0030029	CG15343	0.770781	0.714553	0.563527	1.08073	1.30708	0.662064	0.358352	0.500178	1.42498	1.11767	1.56638	1.00252	0.527222
FBtr0071179	FBgn0030028	Corp	71.8821	82.6577	92.3703	95.0076	89.6814	86.8015	103.476	103.712	88.1584	87.1709	86.9816	103.087	0.484341
FBtr0071180	FBgn0017566	ND75	86.5536	102.574	89.2017	102.571	102.767	111.978	91.8718	90.8264	83.6191	81.3278	123.464	114.856	0.484404
FBtr0071181	FBgn0017566	ND75	5.22207	2.90329	3.45592	11.2572	14.0889	8.88489	1.51547	4.60141	14.3264	10.3759	11.3552	13.5346	0.190117
FBtr0071183	FBgn0030026	sni	38.8603	45.334	38.8342	36.72	45.759	35.9122	37.2947	39.7697	32.7105	41.1893	27.871	35.7585	0.457953
FBtr0071184	FBgn0030018	slpr	22.7968	20.535	19.2922	16.6648	12.7155	26.2905	12.7667	21.8609	20.1142	17.0369	18.6927	19.6225	0.491001
FBtr0071185	FBgn0030017	CG2278	0	0	0	0	0.0357082	0	0	0.0466346	0	0.072065	0.0283326	0.0802157	NA
FBtr0071186	FBgn0030016	Or7a	0.0867669	0.142686	0.0457671	0	0.0476443	0	0	0	0	0	0.0457378	0.0457852	NA
FBtr0071187	FBgn0030015	CG10761	0.0429523	0	0	0	0.0471673	0.047941	0	0	0.0825047	0	0	0	NA
FBtr0071188	FBgn0265464	Traf6	25.0314	29.1097	29.5466	28.5028	26.4448	30.8503	26.5611	27.6228	24.851	23.677	32.8126	30.3214	0.782594
FBtr0071189	FBgn0030011	Gbeta5	4.28224	4.47283	3.29647	2.76056	2.75749	5.15768	5.16792	4.58667	4.11059	2.92969	4.97356	2.58042	0.529617
FBtr0071190	FBgn0030007	CG2263	114.288	110.315	112.721	110.157	117.352	118.672	121.19	117.955	120.85	122.714	109.987	114.32	0.538319
FBtr0071191	FBgn0030006	CG17982	23.5299	19.9957	17.8928	18.863	18.1544	16.7832	20.6963	22.5068	17.9655	21.7884	17.9928	17.9901	0.473976
FBtr0071192	FBgn0025800	Smox	35.3255	41.1422	38.8615	26.1906	28.1019	35.1018	38.3698	37.5781	28.0479	26.1326	34.402	29.5302	0.0883986
FBtr0071193	FBgn0030001	cyr	0	0	0	0	0.0225536	0.0689947	0	0.0193214	0	0.0612434	0	0	NA
FBtr0071194	FBgn0030000	CG2260	46.5725	48.0349	46.7819	53.5743	47.6556	55.6114	46.8432	47.6988	46.0584	44.8585	54.9722	57.1398	0.437648
FBtr0071197	FBgn0030038	CG1440	242.335	233.167	230.704	222.764	234.353	232.46	247.53	243.948	242.85	261.606	247.049	245.225	0.503799
FBtr0071198	FBgn0023506	Es2	87.6127	82.8259	80.5053	70.4257	76.0529	76.3737	81.6001	87.5138	82.8129	82.5076	73.3509	75.008	0.228211
FBtr0071201	FBgn0014465	Cp7Fb	0.0721397	0.026792	0	0	0.0393193	0	0	0	0	0	0.0256731	0	NA
FBtr0071202	FBgn0014466	Cp7Fc	0	0	0.10178	0	0	0	0	0.0903991	0	0	0	0	NA
FBtr0071203	FBgn0000359	Cp36	0	0	0	0	0	0	0	0	0	0	0.051723	0	NA
FBtr0071204	FBgn0000360	Cp38	0	0	0	0	0	0	0	0	0	0.0488104	0	0	NA
FBtr0071207	FBgn0264975	Nrg	0	0	0	0	0	0	0	0	0	0	0	0	NA
FBtr0071208	FBgn0264975	Nrg	3.85071	5.64676	3.44314	2.46102	2.97164	1.96866	3.24692	4.36	3.09227	3.12091	5.50396	2.99413	0.528347
FBtr0071209	FBgn0264975	Nrg	5.15078	5.65027	4.98921	5.92608	5.46159	11.3855	4.09698	6.38974	6.07215	4.19512	5.98051	7.568	0.711182
FBtr0071212	FBgn0030049	Trf4-1	2.72551	2.4725	3.49399	4.41064	4.32239	3.79304	2.53584	2.4672	3.32396	3.91589	5.82705	7.98191	0.153495
FBtr0071213	FBgn0030049	Trf4-1	1.56546	0.867294	1.53313	1.64363	2.70583	0.811479	1.52788	0.321167	2.36828	3.3224	2.14652	1.37618	0.745269
FBtr0071214	FBgn0030052	CG12065	3.44757	3.82817	3.67561	2.58435	2.46317	3.06436	3.46483	3.87882	3.35273	4.11618	3.31845	1.5286	0.44187
FBtr0071215	FBgn0030052	CG12065	0.523193	0.556101	0.734858	0.3336	0.507987	0	0.404151	0.22741	0.924566	0.883392	0.383727	0.365925	0.702015
FBtr0071216	FBgn0030052	CG12065	10.3682	11.0655	11.8165	9.76103	7.85054	10.9846	10.1197	9.58455	7.40695	9.79485	7.32599	7.26546	0.389323
FBtr0071217	FBgn0030052	CG12065	1.59766	1.62076	2.42628	1.34749	1.71989	0	1.17021	0.538969	2.08323	2.13369	0.827096	1.932	0.744866
FBtr0071218	FBgn0030053	CG12081	51.849	50.0465	44.5483	48.8284	49.0229	49.5557	52.2926	47.6472	44.1748	40.7096	53.9331	54.6112	0.581176
FBtr0071219	FBgn0025864	Crag	70.7862	77.0754	66.1799	88.3625	75.1533	91.9432	68.709	58.3727	57.0423	55.1183	111.015	92.9341	0.572082
FBtr0071220	FBgn0025864	Crag	0	0	0	0.263563	0	0.520545	0.321502	0.216939	0	0.778443	0	0.297518	NA
FBtr0071221	FBgn0030055	CG12772	29.4351	30.6573	26.6644	29.9912	26.4159	32.948	26.1013	27.9689	34.2625	25.0185	37.2384	36.0014	0.713863
FBtr0071222	FBgn0030056	CG11284	168.886	189.758	187.611	155.389	169.938	174.989	176.05	187.013	172.13	164.992	159.121	159.433	0.144337
FBtr0071223	FBgn0027864	Ogg1	30.1423	27.8399	28.5967	28.3884	29.7169	26.4194	30.1915	30.7455	28.6706	30.9729	29.0907	30.076	0.492219
FBtr0071224	FBgn0030058	CG11294	0	0	0	0	0.113436	0	0.0519455	0	0	0	0	0.0544652	NA
FBtr0071225	FBgn0030057	Ppt1	29.4346	32.666	24.6504	33.1797	33.3242	33.008	39.5899	35.7236	32.132	25.776	30.1562	32.8972	0.606219
FBtr0071228	FBgn0030054	Caf1-180	209.726	233.712	217.032	238.132	200.543	237.577	214.213	203.003	208.663	197.379	295.675	247.992	0.734006
FBtr0071230	FBgn0030051	spirit	0	0	0	0	0	0.0370234	0	0	0	0	0	0	NA
FBtr0071231	FBgn0030051	spirit	0	0	0	0	0	0	0	0	0	0	0	0	NA
FBtr0071232	FBgn0030050	CG12111	0	0	0	0	0.217382	0	0	0	0	0	0	0.103957	NA
FBtr0071233	FBgn0030048	CG12112	100.638	96.2041	108.462	106.458	112.721	109.962	112.435	108.276	108.976	112.839	107.111	116.017	0.444425
FBtr0071234	FBgn0026679	IntS4	49.5762	48.081	46.8625	58.0901	53.9851	59.1724	45.7026	45.7737	49.7856	43.3455	58.0124	56.5196	0.497867
FBtr0071235	FBgn0024943	PIP82	0.0120574	0	0	0.0128508	0	0	0	0.0112989	0.0231183	0.0238667	0.0253069	0	NA
FBtr0071236	FBgn0003023	otu	276.576	318.371	278.237	263.394	252.199	272.568	269.61	279.625	244.833	266.317	288.661	296.659	0.357296
FBtr0071237	FBgn0003023	otu	3.95e-10	0.00133438	1.33e-07	1.89e-05	1.93e-05	0.442114	5.43213	0.293851	0.510208	0.0743607	6.73e-06	2.19e-08	NA
FBtr0071238	FBgn0003023	otu	24.3824	29.6394	25.0585	29.2093	23.3552	29.7113	25.8732	31.2725	26.5332	27.7047	31.7597	29.2937	0.522621
FBtr0071239	FBgn0053223	CG33223	1.08067	0.861435	0.353006	0.789003	1.40398	1.37089	1.08845	0.920808	0.943887	1.65612	1.24394	1.40037	0.471174
FBtr0071240	FBgn0030041	CG12116	0.400672	0.51268	0.422408	0.463875	0.366053	0.335319	0.437105	0.50068	0.576896	0.496235	0.175748	0.352081	0.607754
FBtr0071241	FBgn0014032	Sptr	80.4566	86.8311	79.9692	81.1354	89.2632	82.7321	92.0349	84.1266	85.5412	86.6329	88.1973	80.8129	0.492219
FBtr0071242	FBgn0030040	CG15347	0	0.13409	0.129275	0.0656342	0	0	0	0.114729	0	0	0	0.129369	NA
FBtr0071243	FBgn0052713	CG32713	0	0	0	0	0	0	0	0	0	0	0	0	NA
FBtr0071244	FBgn0021767	org-1	0	0	0	0.0173566	0.0533743	0.0181536	0.0491613	0	0.0312152	0	0	0	NA
FBtr0071245	FBgn0030039	CG12123	44.1082	40.3298	41.2509	36.9873	44.0355	36.5934	42.188	44.5191	32.6176	50.0491	30.076	35.1226	0.545462
FBtr0071246	FBgn0030037	CG12125	22.3526	22.7067	23.7815	20.5511	23.5904	21.2951	20.7664	19.1441	24.3887	16.6359	25.5489	25.1667	0.572856
FBtr0071248	FBgn0262976	lawc	39.6722	34.5083	36.8853	34.6584	37.2508	34.6799	34.4741	34.3053	31.3151	38.833	31.0375	36.8733	0.482056
FBtr0071249	FBgn0041629	Hexo2	19.6473	26.5011	14.2942	15.0159	20.2255	18.4068	20.335	15.6641	19.0315	18.6542	21.6819	13.9932	0.641701
FBtr0071250	FBgn0030061	CG1785	111.873	110.344	109.7	112.876	112.653	117.06	114.944	112.037	113.05	113.635	117.303	123.709	0.442398
FBtr0071251	FBgn0030063	CG1789	98.9681	101.395	95.4882	88.6304	100.094	96.2518	104.466	103.882	101.205	100.475	94.6213	91.9051	0.435146
FBtr0071253	FBgn0030065	CG12075	0.77506	1.23544	1.15972	1.63373	0.732012	0.838222	1.51289	1.68167	1.73502	1.62915	3.16567	2.8365	0.459739
FBtr0071254	FBgn0030065	CG12075	9.1e-06	1.53e-05	7.85e-06	1.63e-05	3.63e-05	5.53e-07	1.74e-05	8.33e-06	1.33e-05	0.326121	2.01e-05	3.63e-05	NA
FBtr0071255	FBgn0030067	Rbm13	118.609	108.833	119.022	99.4796	101.096	108.166	123.608	131.678	100.369	113.031	102.054	105.895	0.255004
FBtr0071263	FBgn0030073	CG10962	12.2762	10.6605	9.57883	10.2104	9.78716	8.05341	9.49108	8.44532	14.3133	9.09024	14.1719	8.79731	0.572856
FBtr0071264	FBgn0030074	CG12662	0.925678	0.126497	0.245225	0.124905	0.643305	0.129358	0.582963	0.108504	0	0.23017	0	0.122825	NA
FBtr0071265	FBgn0030071	CG12661	0.256272	0	0	0.0979033	0.285573	0	0.048412	0	0.123648	0	0	0	NA
FBtr0071266	FBgn0011586	e(r)	245.599	234.857	236.762	223.624	225.413	204.539	212.273	221.733	219.736	234.073	212.351	211.411	0.235158
FBtr0071267	FBgn0011586	e(r)	0.216376	0.904702	1.75023	0.222214	1.36488	1.37585	0	1.89902	0.810784	0.825906	0.438722	0.452217	0.755312
FBtr0071268	FBgn0030066	CG1885	30.8239	28.1208	30.9349	29.6611	28.3663	28.0487	30.3593	34.5669	32.0446	34.3467	30.0872	29.8409	0.527222
FBtr0071269	FBgn0011661	Moe	17.4931	6.96948	5.38084	22.0007	15.0032	11.3007	0.373186	8.47917	9.67422	8.56648	21.9627	27.0055	0.526517
FBtr0071270	FBgn0011661	Moe	0.152856	0	0	0	0	0	0	0.20448	0	0	0	0	NA
FBtr0071271	FBgn0011661	Moe	0	0.146668	0.395384	0.241036	0	0.51853	0.98772	0	0.115687	0.614425	0.248318	0.120564	0.663607
FBtr0071272	FBgn0011661	Moe	0	0	0	0	0	0	0	0.568714	0	0	0	1.23415	NA
FBtr0071273	FBgn0011661	Moe	11.7735	7.25626	9.33111	8.4392	7.56475	10.9506	13.1025	7.2524	5.06195	7.93839	9.47576	5.15699	0.573801
FBtr0071274	FBgn0011661	Moe	55.4658	67.3738	65.9738	79.3532	78.518	74.0797	69.4576	63.3718	81.8974	60.8778	85.1358	65.6954	0.484404
FBtr0071275	FBgn0011661	Moe	131.022	145.727	139.281	118.222	114.414	131.511	118.671	155.21	144.63	116.401	128.314	118.219	0.135723
FBtr0071276	FBgn0011661	Moe	0.0191568	5.3473	0.630549	2.53663	2.83233	5.63685	0.164425	6.23276	2.74432	8.11317	1.95096	2.06236	0.401481
FBtr0071277	FBgn0011661	Moe	37.1096	34.9692	31.3893	10.3996	14.9073	17.6043	35.7757	10.6445	21.8272	27.3276	16.1586	28.5308	0.287617
FBtr0071278	FBgn0011661	Moe	70.8958	92.6182	82.3447	76.1281	86.8655	88.7424	85.2346	87.529	81.7469	78.4315	81.068	81.2668	0.659006
FBtr0071279	FBgn0026411	Lim1	0	0	0	0	0	0.126469	0	0.10626	0.0155331	0.0986899	0.119068	0.0682253	NA
FBtr0071280	FBgn0027330	l(1)G0020	41.0845	28.2006	30.9154	42.3379	45.6544	41.5129	42.1521	36.7359	30.8721	41.8323	33.7064	46.7649	0.407416
FBtr0071281	FBgn0030060	CG2004	67.3908	63.4345	69.7633	65.7929	60.6609	69.3596	70.6868	76.5222	79.2242	61.0844	62.8743	58.3167	0.384013
FBtr0071284	FBgn0030082	HP1b	1.35829	0.497245	0.476278	0.48182	1.9741	0.504762	0.91151	0.848505	0.433744	0.447826	0.474308	1.42826	0.810372
FBtr0071285	FBgn0052707	APC4	28.519	29.9774	24.6708	27.585	33.0005	29.0684	30.2394	35.3524	34.2093	28.9679	28.9469	33.092	0.512698
FBtr0071286	FBgn0052708	CG32708	48.5588	46.2059	50.1021	35.8484	51.9943	53.2602	50.3381	44.7004	41.2848	51.1255	45.6963	43.6898	0.664146
FBtr0071287	FBgn0052706	CG32706	0.261997	0.179497	0.184615	0.210854	0.303478	0.109916	0.145743	0.36876	0.189233	0.364149	0.259966	0.181023	NA
FBtr0071288	FBgn0030085	CG6999	0.195689	0.535727	0.0917991	0.279971	0.201141	0.546183	0.577693	0.366485	0.376123	0.0905115	0.431026	0.716309	NA
FBtr0071289	FBgn0030086	CG7033	666.924	663.825	686.339	697.579	728.353	691.395	706.383	709.544	723.674	756.67	671.517	739.86	0.453951
FBtr0071293	FBgn0030088	Arfrp1	57.0593	52.3339	53.7038	54.0141	53.7555	50.6918	54.2614	53.5742	50.135	52.386	57.0076	53.9418	0.452932
FBtr0071294	FBgn0030089	AP-1gamma	0.16348	0.734365	0.212865	0.11268	0	0.635094	0.0430054	0.0668852	0	0.424988	0.372806	0.15485	0.910745
FBtr0071295	FBgn0030089	AP-1gamma	22.1106	16.7094	22.4433	26.9847	22.8877	25.46	19.3608	15.4181	16.7531	18.8544	28.521	27.1384	0.435845
FBtr0071296	FBgn0030089	AP-1gamma	0.144675	0.364145	0.100372	0.031127	0	0.474975	0.566987	0.089335	0	0.294361	0.187815	0.185345	1
FBtr0071297	FBgn0030089	AP-1gamma	8.0396	8.73661	7.11457	8.27932	7.60302	8.21669	6.27827	6.52456	7.09728	7.88084	10.7105	7.72329	0.658852
FBtr0071298	FBgn0030089	AP-1gamma	30.4523	44.0215	31.4693	31.6734	37.2004	41.227	37.3908	30.971	35.3783	22.4621	46.7241	44.8306	1
FBtr0071299	FBgn0030091	CG7065	17.6971	18.6542	19.4198	20.7415	20.7651	20.7393	18.5715	19.3081	20.9246	18.919	24.6356	23.0467	0.26753
FBtr0071300	FBgn0030093	dalao	240.338	237.124	223.312	249.778	250.623	259.94	216.985	219.486	219.669	192.111	289.206	264.675	1
FBtr0071302	FBgn0040467	Dip1	48.17	44.6124	47.9335	35.9557	45.7225	40.8987	47.8193	44.7251	43.5143	51.9939	35.8332	38.2352	0.428616
FBtr0071303	FBgn0026206	mei-P26	30.4546	32.0151	39.6507	37.5569	39.0547	41.8994	27.9234	38.9919	43.6214	33.0475	50.708	43.789	0.362447
FBtr0071304	FBgn0030098	CG12057	0	0	0	0	0	0	0	0	0	0	0	0	NA
FBtr0071305	FBgn0030099	CG12056	14.7491	20.4255	14.5164	12.9039	13.9028	17.9845	18.6012	21.069	17.4683	14.4573	14.6502	15.3368	0.467922
FBtr0071306	FBgn0030100	CG12106	33.8859	31.9797	26.7194	23.7241	29.0056	29.0242	31.5271	31.0037	26.4701	27.0481	29.5738	27.4639	0.373993
FBtr0071307	FBgn0030103	Obp8a	0	0	0	0	0	0	0	0	0	0	0	0	NA
FBtr0071308	FBgn0030104	CG15368	0	0	0	0	0	0	0	0	0	0	0	0	NA
FBtr0071309	FBgn0030105	CG15369	0	0	0	0	0	0	0	0	0	0	0	0	NA
FBtr0071310	FBgn0030107	CG15370	0	0.141398	0.090704	0	0.0472103	0.33589	0.129893	0.0402934	0.0825795	0.383554	0.181286	0.136109	NA
FBtr0071311	FBgn0030108	Gr8a	0	0	0	0.037287	0.0382536	0	0	0	0.0334873	0	0	0	NA
FBtr0071313	FBgn0010269	Dsor1	109.423	116.362	116.534	110.051	105.619	116.193	115.401	116.142	118.753	111.433	119.28	113.117	0.437015
FBtr0071314	FBgn0030114	CG17754	0	0	0	0	0	0	0	0	0	0	0	0	NA
FBtr0071315	FBgn0030114	CG17754	21.0279	25.1544	23.7517	24.3834	24.4083	27.6475	22.5895	24.0686	25.3646	22.5699	27.3857	25.511	0.481118
FBtr0071316	FBgn0030114	CG17754	19.5621	16.1591	15.3161	15.4237	13.1329	18.3383	18.3041	18.8795	16.4955	15.9918	18.7008	18.7313	0.6373
FBtr0071317	FBgn0028292	ric8a	55.9993	58.0978	60.0251	60.3991	58.5882	60.3678	59.8531	60.0605	60.9551	61.652	59.4698	64.5341	0.464708
FBtr0071318	FBgn0030117	ric8b	0	0	0	0.15612	0	0	0.282334	0	0.273839	0	0	0	NA
FBtr0071319	FBgn0030122	CG16892	80.3282	85.3457	80.6148	81.3063	85.8131	73.1899	91.7646	83.6864	90.4552	101.322	81.1079	80.5927	1
FBtr0071320	FBgn0002576	lz	0	0	0.0904137	0	0	0	0.0720428	0	0	0	0	0.120535	NA
FBtr0071321	FBgn0040234	c12.2	17.0185	18.6131	14.6393	19.5077	18.9773	20.3261	15.959	18.495	15.4569	13.4914	18.7603	21.4165	0.772646
FBtr0071324	FBgn0040235	c12.1	93.3674	82.9785	85.7738	94.6787	96.6009	94.3218	88.6787	82.2825	80.1666	83.7291	100.392	92.8784	0.485883
FBtr0071326	FBgn0040236	c11.1	46.433	58.0351	53.0402	56.7754	48.0528	61.6179	52.4896	52.3573	50.1418	47.1826	68.6092	63.9209	0.621486
FBtr0071327	FBgn0030121	Cfp1	0.496564	0	0	0	0	0	0	0.238926	0	0.262893	0.29709	0.294014	NA
FBtr0071328	FBgn0030120	CG17440	2.10623	2.43945	2.69453	1.49983	1.85613	1.88708	2.49357	1.93084	1.54315	1.26791	2.21466	1.91438	0.474355
FBtr0071329	FBgn0052703	Erk7	0	0	0	0	0	0	0	0	0	0	0	0	NA
FBtr0071331	FBgn0000077	amx	2.7037	1.97956	5.21422	2.87722	3.92949	2.26067	3.17516	5.70027	3.02182	3.56563	4.01251	4.02754	0.687723
FBtr0071332	FBgn0260789	mxc	0.805764	0.887956	0.847613	1.43105	1.17108	0.898306	1.35181	1.0067	0.257696	1.3283	1.97183	0.84727	0.740826
FBtr0071333	FBgn0052704	Ir8a	0	0	0	0	0.0195058	0.0198984	0	0	0	0	0	0	NA
FBtr0071334	FBgn0030109	CG12121	75.5985	84.251	76.8497	86.0217	72.3537	86.208	82.5403	76.4774	71.7484	72.7613	101.832	100.733	0.545462
FBtr0071335	FBgn0086367	t	0	0	0	0	0	0	0	0	0	0	0	0	NA
FBtr0071336	FBgn0030102	CG12119	0	0	0	0	0	0	0	0	0	0	0	0	NA
FBtr0071338	FBgn0086450	su(r)	0	0	0	0	0	0	0	0	0	0	0	0	NA
FBtr0071339	FBgn0030101	CG12118	8.66957	6.53958	7.17248	12.1923	8.77648	14.0781	8.0899	6.97312	5.57469	8.8943	8.51113	5.06166	1
FBtr0071340	FBgn0030101	CG12118	38.1597	38.4235	41.9633	39.3161	39.4776	32.6989	42.8886	42.9667	41.2015	37.7773	36.8564	45.3867	0.542509
FBtr0071341	FBgn0030097	CG12115	0	0	0	0	0	0	0	0	0	0	0	0	NA
FBtr0071342	FBgn0030096	Zpr1	61.5276	63.0045	66.3682	57.1112	59.7627	60.3485	66.8912	69.0952	67.1115	64.4759	58.5077	63.2049	0.409094
FBtr0071343	FBgn0040931	CG9034	118.155	114.23	121.03	117.403	134.155	125.972	123.136	125.469	122.184	144.645	124.096	123.408	0.499806
FBtr0071344	FBgn0014868	Ost48	121.249	114.893	130.406	139.341	137.117	140.425	130.893	127.62	142.371	132.585	152.022	145.182	0.211292
FBtr0071345	FBgn0004828	His3.3B	925.656	923.326	927.395	807.335	859.024	890.256	954.766	926.659	845.604	918.924	816.684	796.371	0.251217
FBtr0071346	FBgn0004828	His3.3B	0.546692	0.606613	0.574303	0	0.186866	0.994539	0.371738	0	0	0.550235	0.188008	0	0.446627
FBtr0071347	FBgn0004828	His3.3B	12.7239	10.7328	10.9222	8.96328	13.2101	10.5065	11.4106	12.8162	8.8049	8.18573	9.54309	15.6375	0.644092
FBtr0071348	FBgn0030092	fh	33.856	30.4675	29.2032	29.6044	37.1993	31.4517	32.2129	37.6802	33.7577	36.0387	32.9394	32.6516	0.527184
FBtr0071349	FBgn0030090	fend	46.6807	51.4555	47.6281	51.5387	47.3035	50.9905	45.1319	50.4133	45.8108	49.944	57.5509	53.2487	0.44203
FBtr0071350	FBgn0004856	Bx42	137.233	140.358	130.329	138.523	143.56	144.85	134.603	131.685	132.116	125.22	142.583	133.056	0.474446
FBtr0071351	FBgn0030087	CG7766	0	0	0	0	0	0	0	0	0	0	0	0	NA
FBtr0071352	FBgn0030087	CG7766	5.15997	2.21367	5.22052	3.69708	3.09903	5.01993	2.12108	2.77733	4.00955	1.49023	3.29236	3.20788	0.504101
FBtr0071353	FBgn0030081	CG7246	55.7906	57.2498	66.3641	58.5162	53.531	58.6613	59.7093	62.6899	54.0791	53.1688	57	61.3501	0.411677
FBtr0071356	FBgn0030078	CG10970	0	0	0	0	0	0	0	0	0	0	0	0	NA
FBtr0071357	FBgn0030077	CG15365	0	0.0164879	0.0316377	0	0.0328326	0.0335105	0	0	0	0	0	0.0316342	NA
FBtr0071358	FBgn0026149	BCL7-like	102.546	97.0871	99.4446	109.628	118.184	112.499	99.9198	99.5107	103.531	101.996	118.962	113.628	0.34647
FBtr0071360	FBgn0030136	RpS28b	2201.03	2254.1	2328.53	2094.78	2199.46	2059.8	2089.76	2213.07	2178.49	2156.34	2042.1	2067.1	0.224846
FBtr0071361	FBgn0001186	Hex-A	68.4854	77.7028	68.0285	73.8812	71.0524	72.8399	72.0924	72.5367	78.4916	71.1199	78.3894	79.4185	0.465396
FBtr0071362	FBgn0001186	Hex-A	68.4854	77.7028	68.0285	73.8812	71.0524	72.8399	72.0924	72.5367	78.4916	71.1199	78.3894	79.4185	0.465396
FBtr0071363	FBgn0030141	Gga	72.0034	77.4892	73.916	81.4281	85.5193	95.592	82.7803	74.0887	78.1088	71.8085	88.5529	87.2731	0.414919
FBtr0071366	FBgn0027084	Aats-lys	203.104	200.521	207.631	210.526	209.314	215.839	205.692	210.964	220.329	223.817	216.896	223.961	0.428988
FBtr0071367	FBgn0027084	Aats-lys	4.52763	1.48067	0.793796	2.22983	0.717425	0.841271	4.55755	1.29833	2.16872	3.73188	1.58103	2.38043	0.946077
FBtr0071368	FBgn0264691	Lst8	68.785	71.235	71.7369	70.1837	70.7762	74.131	66.7857	66.6305	65.8688	66.8537	73.4235	69.8373	0.445591
FBtr0071371	FBgn0030137	CG15317	46.5028	43.0268	44.7773	36.3189	50.606	45.3709	46.5674	52.4538	33.483	46.1628	32.5411	41.5578	0.510577
FBtr0071372	FBgn0028327	l(1)G0320	154.026	173.918	161.667	102.698	109.198	140.001	159.705	180.56	139.76	137.887	116.484	146.469	0.176942
FBtr0071373	FBgn0267253	CG32700	0	0	0	0	0	0	0.0369748	0	0	0	0	0	NA
FBtr0071374	FBgn0267253	CG32700	0	0.0128479	0	0	0	0	0	0.0109679	0	0	0	0	NA
FBtr0071379	FBgn0000233	btd	0	0.112292	0.0179586	0.0181864	0	0	0	0.0159805	0	0.0168818	0.0716357	0	NA
FBtr0071381	FBgn0020378	Sp1	0	0.0160414	0	0	0	0	0.0147142	0	0	0	0	0.0307736	NA
FBtr0071386	FBgn0052698	CG32698	0	0	0	0	0	0	0	0	0	0.560998	0	0	NA
FBtr0071387	FBgn0019929	Ser7	0	0	0	0	0	0	0	0	0	0	0	0	NA
FBtr0071388	FBgn0030157	CG1468	0	0	0	0	0	0	0	0	0	0	0	0	NA
FBtr0071389	FBgn0030158	CG9686	0	0	0	0	0	0	0	0	0	0	0	0	NA
FBtr0071390	FBgn0030159	CG9689	0	0	0	0	0	0	0	0	0	0	0	0	NA
FBtr0071391	FBgn0030160	CG9691	0	0	0	0	0	0	0	0	0	0	0	0	NA
FBtr0071392	FBgn0030160	CG9691	0	0	0	0	0	0	0	0	0	0	0	0	NA
FBtr0071393	FBgn0026415	Idgf4	282.96	305.243	283.766	324.92	311.915	340.799	308.006	311.696	315.99	318.262	374.413	361.94	0.145267
FBtr0071394	FBgn0026415	Idgf4	5.85253	4.83212	2.73545	6.1804	2.50036	2.65169	1.25861	4.53921	3.25068	2.76377	9.66814	7.23755	0.82519
FBtr0071395	FBgn0030162	CG1986	0	0	0	0	0	0	0	0	0.0353318	0	0	0	NA
FBtr0071397	FBgn0030156	CG15247	0.0726982	0.611509	0	0.0258672	0.397872	0.432537	0.0488	0.0227098	0.092992	0.311982	0.101904	0.025533	NA
FBtr0071398	FBgn0052695	CG32695	0	0	0	0	0	0	0	0	0	0	0	0	NA
FBtr0071402	FBgn0261617	nej	103.248	116.237	104.006	156.056	104.217	166.753	113.844	93.0861	98.4314	101.689	235.152	183.785	0.354064
FBtr0071403	FBgn0030148	CG3106	0	0.0227127	0.0872117	0	0.0905691	0.0692652	0.0625208	0.0581914	0.0794122	0.0614836	0	0.0436049	NA
FBtr0071404	FBgn0028341	l(1)G0232	63.5382	74.0956	65.7038	70.7454	68.1962	85.3258	56.9602	57.4309	59.2496	55.6323	81.7353	67.5715	1
FBtr0071405	FBgn0028341	l(1)G0232	83.1788	74.3255	68.9754	84.1967	81.4705	76.1435	74.9395	80.8354	68.2606	69.1137	96.3392	89.2992	0.570223
FBtr0071406	FBgn0028341	l(1)G0232	0	0	0.406221	0	0	0	0	0	1.52887	0.709501	0	0.369847	NA
FBtr0071407	FBgn0028341	l(1)G0232	0	0	0	0	0	0	0	0	0.278497	0.13698	0	0	NA
FBtr0071408	FBgn0030164	CG1889	0	0	0	0	0	0	0	0	0	0	0	0	NA
FBtr0071410	FBgn0052694	CG32694	0.0316216	0	0	0	0	0	0.0159183	0	0	0	0	0	NA
FBtr0071411	FBgn0052694	CG32694	8.86e-06	0	4.96e-06	0.0442268	0	1.04e-05	0	0	8.58e-06	4.8e-06	0	0	NA
FBtr0071412	FBgn0052694	CG32694	0	0	0	0	0	0	0	0	0	0	0	0	NA
FBtr0071415	FBgn0030170	CG2990	74.5382	78.1521	77.3077	77.7894	67.1277	69.7868	74.3144	71.3187	81.0211	75.621	75.8738	69.0048	0.384729
FBtr0071419	FBgn0004045	Yp1	0	0	0	0	0	0	0	0	0	0	0.071658	0	NA
FBtr0071420	FBgn0052693	Gr9a	0	0	0	0	0	0.0603283	0	0	0	0	0	0	NA
FBtr0071421	FBgn0030174	CG15312	29.7523	27.7293	23.6787	21.3677	21.1472	24.8449	22.5059	25.2965	16.5458	23.0256	21.8026	19.0866	0.195097
FBtr0071422	FBgn0030174	CG15312	35.9106	29.5962	29.491	17.3704	14.6965	25.8087	26.6072	26.0392	26.481	23.9606	16.096	21.1857	0.140154
FBtr0071423	FBgn0030174	CG15312	0	0.179652	0	0	0	0.295409	0.243977	0	0.199316	0.0679055	0	0.106339	NA
FBtr0071424	FBgn0005391	Yp2	0.0337928	0	0	0	0.111151	0.113125	0	0.0316707	0	0.0334828	0	0.0356347	NA
FBtr0071429	FBgn0030163	CG1791	0	0	0	0	0	0	0	0	0	0	0	0	NA
FBtr0071430	FBgn0030177	CG2972	103.688	102.18	100.126	89.4233	97.5302	94.2875	112.652	121.75	89.116	102.284	88.283	94.0497	0.298451
FBtr0071438	FBgn0028342	l(1)G0230	436.681	420.555	415.007	403.729	423.879	399.568	421.834	431.293	402.617	455.652	383.746	409.261	0.497061
FBtr0071439	FBgn0085437	CG34408	30.2961	33.6213	32.9946	38.7181	32.9468	40.805	33.0307	31.823	32.5474	27.8377	47.4467	43.704	0.460923
FBtr0071441	FBgn0030189	CG2909	12.8767	13.6814	13.9696	7.94467	9.87105	13.1754	14.6025	15.3284	9.30838	10.1622	11.884	14.3184	0.405404
FBtr0071444	FBgn0028480	CG17841	83.7182	88.1481	84.3355	84.3809	83.8441	85.5712	81.5537	84.9057	83.2576	79.0336	91.3093	89.9979	0.44384
FBtr0071445	FBgn0030195	CG2898	0	0	0	0.0917499	0	0	0.0431804	0.0401844	0	0	0.0451982	0	NA
FBtr0071446	FBgn0000711	flw	0	0	0	0	0.0913092	0.0940852	0	0.0757363	0	0	0	0	NA
FBtr0071447	FBgn0000711	flw	50.0241	52.9811	52.0906	56.584	57.4384	54.1369	51.4279	53.931	49.0841	50.4972	60.6814	59.2571	0.431058
FBtr0071448	FBgn0030200	RabX2	0	0	0	0	0	0	0	0	0	0	0	0	NA
FBtr0071449	FBgn0083167	Neb-cGP	390.71	410.366	403.045	395.468	423.527	373.015	420.391	421.359	416.549	415.207	374.442	386.986	0.455398
FBtr0071450	FBgn0030206	CG2889	0	0	0	0	0.690935	0	0	0	0	0	0	0	NA
FBtr0071451	FBgn0030208	PPP4R2r	80.7702	68.5595	69.7322	103.522	99.0353	103.888	78.9519	70.8173	73.8088	80.9788	97.462	99.2944	0.157073
FBtr0071452	FBgn0030208	PPP4R2r	14.8615	36.5869	26.4913	18.1067	16.1147	19.2082	29.6148	23.5184	22.8797	18.0053	25.332	27.1878	0.639422
FBtr0071453	FBgn0030208	PPP4R2r	6.26924	2.18087	1.64101	4.2371	3.58466	3.10335	1.60722	3.81586	1.51377	1.83292	5.82268	1.39037	0.90507
FBtr0071458	FBgn0052687	CG32687	0.0431044	0.165542	0.0227037	0.045996	0.0471597	0.0480829	0.0651008	0.141382	0	0.0640229	0.0905964	0	NA
FBtr0071459	FBgn0030207	CG2887	0.218512	0.191644	0.0922092	0.140296	0.0479974	0.0975586	0.0440145	0.286722	0.125924	0.259943	0.138229	0.0922463	NA
FBtr0071460	FBgn0261710	nocte	32.2996	26.0314	28.7328	49.9629	33.6218	48.2913	36.6918	28.6605	34.2	31.4449	74.7333	61.0597	0.1911
FBtr0071461	FBgn0261710	nocte	77.2483	94.5097	87.5565	137.926	100.838	143.013	100.075	79.4784	88.7365	92.0875	210.946	154.973	0.203209
FBtr0071462	FBgn0030204	Or9a	0	0	0	0	0	0	0.0927193	0	0	0.136909	0	0	NA
FBtr0071463	FBgn0052683	CG32683	0	0	0	0	0	0	0	0	0	0	0	0	NA
FBtr0071464	FBgn0030202	CG12640	0	0	0	0	0	0	0	0	0	0	0	0	NA
FBtr0071465	FBgn0030196	Psf3	78.3356	74.7693	74.5514	69.24	71.3217	65.696	80.5947	75.3169	78.3288	77.966	64.5087	65.803	0.32535
FBtr0071466	FBgn0052681	CG32681	0.010435	0	0	0.0333582	0	0.0465471	0	0.00977851	0.0100029	0	0.0109483	0	NA
FBtr0071467	FBgn0052686	CG32686	0.0140244	0.0461805	0	0.014951	0.0153239	0.015641	0.0141195	0	0.0134464	0.0277631	0.0147219	0.0295285	NA
FBtr0071468	FBgn0052686	CG32686	0	0	0	0	0	0	0	0.0128988	0	0	0	0	NA
FBtr0071469	FBgn0052679	CG32679	0	0	0	0	0	0.0719593	0	0	0	0	0	0	NA
FBtr0071470	FBgn0028331	l(1)G0289	118.227	112.181	114.624	124.374	97.653	127.951	113.25	106.612	111.915	93.2802	155.425	140.557	1
FBtr0071471	FBgn0030191	CG15306	0	0	0	0.0323547	0	0	0.0613232	0	0	0	0.0321617	0.0641492	NA
FBtr0071472	FBgn0011770	Gip	185.28	200.017	184.517	178.549	191.667	192.318	202.126	208.116	195.773	182.404	164.912	179.078	0.35839
FBtr0071481	FBgn0040942	CG12643	0.053729	0.0588792	0.170159	0	0.0591118	0.179961	0.0541191	0.201442	0	0	0.283656	0.170259	NA
FBtr0071484	FBgn0030187	Ipod	1.96105	3.12384	1.64764	3.40777	5.45562	6.83261	3.06415	2.25862	0.75822	2.60133	8.3379	2.7822	0.482056
FBtr0071486	FBgn0030186	CG2962	0.0392306	0.0430163	0.0520748	0.0329387	0.0657832	0.110039	0.286669	0.0367681	0.0473986	0.0877911	0.0630505	0.187036	NA
FBtr0071487	FBgn0030183	CG15309	26.7799	28.5892	23.3469	15.793	15.3374	17.6964	20.3476	23.2954	27.166	20.5754	22.9577	21.0059	0.200112
FBtr0071489	FBgn0052685	ZAP3	32.5736	37.0875	32.8119	44.7776	41.8138	42.2894	29.2236	29.4458	32.5095	38.5988	55.7061	46.7763	0.0911995
FBtr0071490	FBgn0067052	Rab9D	0	0	0	0	0	0	0	0	0	0	0	0	NA
FBtr0071491	FBgn0030217	CG2124	9.09465	8.81933	7.54306	7.46509	6.97448	7.2047	8.26086	8.29895	7.90363	7.31772	8.57757	8.24282	0.435276
FBtr0071492	FBgn0030223	CG2111	0	0	0	0	0	0	0	0	0	0	0	0	NA
FBtr0071493	FBgn0052677	X11Lbeta	0.0111508	0.0976071	0.0293142	0.0236915	0.0484127	0.025642	0.0402512	0.0209627	0.0267102	0.0771477	0.071866	0	NA
FBtr0071494	FBgn0003204	ras	7.56914	9.35652	6.71806	7.35274	9.72311	10.4267	8.09452	12.0935	10.614	7.19731	2.36215	9.5067	0.706828
FBtr0071495	FBgn0003204	ras	0	0.0377138	0	0.00829732	0	0	0.823613	4.54e-05	9.02e-06	0.685457	0.413738	0	NA
FBtr0071497	FBgn0030228	BTBD9	81.3397	93.8825	90.6659	88.4494	81.9763	96.1021	86.4163	91.5813	83.0377	73.4663	99.6328	96.4156	0.932475
FBtr0071498	FBgn0052672	Atg8a	123.412	116.307	117.004	126.939	124.948	122.645	122.591	124.933	112.98	114.448	132.854	124.436	0.474039
FBtr0071499	FBgn0052675	Tango5	0	0	0	0	0.207114	0	0	0	0.234535	0	0	0.428926	NA
FBtr0071500	FBgn0052675	Tango5	55.0046	66.967	63.1179	49.5695	55.6552	61.3452	59.4435	59.3004	61.3816	54.1653	56.7099	57.5116	0.271948
FBtr0071501	FBgn0052675	Tango5	0	0.331141	0.153233	0.155574	0.312371	0.323247	0.447747	1.55146	0.145846	0	0.749191	0.156124	0.726462
FBtr0071502	FBgn0030230	Rph	0.0709603	0.019469	0.0934161	0	0.0387927	0.098935	0.0357223	0.116372	0.136101	0.0878138	0.130428	0.0373635	NA
FBtr0071503	FBgn0052676	CG32676	99.0682	107.927	103.786	127.618	109.436	127.274	100.561	98.8472	105.431	85.6142	163.923	142.66	0.473453
FBtr0071504	FBgn0030224	CG12637	0	0	0	0	0	0	0	0	0	0	0	0	NA
FBtr0071505	FBgn0052673	Rab9E	0	0	0	0	0	0	0	0	0	0	0	0	NA
FBtr0071506	FBgn0030222	CG9806	0	0	0.0361771	0	0	0.0191576	0	0	0	0	0	0	NA
FBtr0071507	FBgn0030221	Rab9Db	0	0	0	0	0	0	0	0	0	0	0	0	NA
FBtr0071510	FBgn0030218	CG1628	1.34675	0.783321	2.3293	1.03782	2.03399	2.22948	1.47689	3.68569	0.890916	2.40867	0.969144	1.2452	0.741628
FBtr0071511	FBgn0001206	Hmr	57.3744	58.8207	57.041	71.6033	66.4632	70.2157	59.3492	53.2946	59.4052	56.0453	78.3069	71.2036	0.264865
FBtr0071512	FBgn0030215	CG15296	0	0	0	0	0	0	0	0	0	0	0	0	NA
FBtr0071515	FBgn0050295	Ipk1	0	0	0	0	0	0	0	0	0	0	0	0	NA
FBtr0071517	FBgn0034560	CG9235	0	0	0	0	0	0	0	0	0	0	0	0	NA
FBtr0071519	FBgn0000044	Act57B	0	0.0330506	0.0317595	0	0	0	0	0.0282381	0	0	0	0.0317638	NA
FBtr0071520	FBgn0034564	CG9344	138.224	116.108	128.901	110.958	140.786	133.598	130.92	130.245	129.62	132.114	104.247	113.846	0.514379
FBtr0071521	FBgn0034566	CG9313	0.0156495	0	0.0658003	0	0	0.017425	0	0.0444354	0	0.0154489	0	0	NA
FBtr0071522	FBgn0261394	Prosalpha3	498.566	465.128	506.595	448.649	481.016	483.565	493.984	485.642	505.499	580.275	481.4	497.268	1
FBtr0071524	FBgn0034570	CG10543	9.01562	9.83166	9.31579	19.6488	11.6173	16.2082	8.74261	9.66796	6.29239	8.03143	17.3213	16.3253	0.382378
FBtr0071526	FBgn0034572	CG9346	36.1909	39.5366	34.6539	36.9771	35.608	38.2645	36.0681	33.9307	33.7775	33.8963	34.7495	40.2851	0.473473
FBtr0071527	FBgn0050296	RIC-3	0	0	0	0	0	0	0	0	0	0	0	0	NA
FBtr0071528	FBgn0050296	RIC-3	0	0	0	0	0	0	0	0	0	0	0	0	NA
FBtr0071530	FBgn0034576	CG9350	106.959	115.964	111.716	114.593	119.303	122.223	118.428	113.896	121.985	121.195	119.234	112.29	0.477576
FBtr0071532	FBgn0034577	cpa	139.598	145.263	139.559	137.436	136.511	136.711	140.328	141.946	141.855	137.183	144.96	144.327	0.415055
FBtr0071533	FBgn0034579	mRpL54	98.1303	86.6062	76.9821	76.7742	84.646	93.0937	85.1945	93.0768	86.3846	85.87	73.0745	70.0277	0.435828
FBtr0071534	FBgn0034580	Cht8	0.109555	0.0800936	0.0385074	0	0.16023	0.163011	0.18388	0.376482	0.0350598	0	0.192307	0.154071	NA
FBtr0071535	FBgn0003748	Treh	9.32753	10.186	11.9953	11.8445	14.6191	11.9824	9.224	11.1279	9.91219	10.2972	11.5862	11.1875	0.591065
FBtr0071536	FBgn0003748	Treh	3.27e-05	0.11586	0.0831769	0.226207	3.33948	2.34e-07	0.00100257	3.68592	0.238732	2.35e-05	12.9723	0.0267636	NA
FBtr0071537	FBgn0003748	Treh	29.0391	35.7412	26.6399	30.9238	25.7161	32.3302	34.2757	33.5946	33.2195	23.529	23.8595	31.6295	0.455398
FBtr0071538	FBgn0003748	Treh	0.31778	1.20333	0.532272	0	0.829211	0.625201	0.62322	0.869403	1.14914	0.570961	1.50343	0.548595	1
FBtr0071539	FBgn0003748	Treh	0	0	0	0	0	0.487858	0.115218	0	0.590952	0.30607	0	0	NA
FBtr0071540	FBgn0003748	Treh	0.15664	0.632839	0.72626	0.487989	0.150045	0	0	0.122594	0	0.102005	0.140736	0.147714	0.497163
FBtr0071541	FBgn0034583	CG10527	170.188	170.33	160.337	197.451	198.532	189.038	175.978	179.244	190.446	186.905	201.303	190.874	0.219859
FBtr0071542	FBgn0034582	Cht9	0	0	0	0	0.102956	0	0	0.0439076	0	0	0.0494136	0	NA
FBtr0071543	FBgn0022700	Cht4	0	0	0	0	0	0	0	0	0	0	0	0	NA
FBtr0071544	FBgn0050293	Cht12	0	0.0347205	0	0	0	0.0353209	0.191259	0.029667	0	0	0	0.100124	NA
FBtr0071545	FBgn0034578	CG15653	31.8318	31.5985	27.7933	28.0657	39.1875	34.3246	36.4649	36.06	27.147	38.6305	23.1217	30.2172	1
FBtr0071546	FBgn0003391	shg	63.6041	75.8489	66.7169	79.8001	61.3314	82.3415	66.4791	67.8646	61.8485	64.906	102.365	90.6386	0.465396
FBtr0071547	FBgn0034573	CG3295	57.0432	58.1463	57.2979	61.0971	61.0745	63.9844	62.0672	57.9753	58.1312	57.2751	64.6602	60.4453	0.452932
FBtr0071548	FBgn0001133	grau	52.1148	46.1312	52.8844	49.1155	49.9838	52.4075	52.1203	49.7071	49.7969	49.4099	53.8685	51.1696	0.478096
FBtr0071549	FBgn0050291	CG30291	52.2092	49.9732	47.7278	48.8135	48.241	50.0283	53.8434	52.0897	47.1757	50.9126	49.9726	52.1211	0.459209
FBtr0071553	FBgn0034567	CG15651	0	0	0	0	0	0	0	0.0185568	0.018992	0	0	0	NA
FBtr0071554	FBgn0034565	CG15650	0	0.211489	0	0	0.107118	0.00490747	0	0.457078	0	0.288238	0.205406	0.512325	NA
FBtr0071555	FBgn0034563	CG15649	0	0	0	0	0	0	0	0	0	0	0	0	NA
FBtr0071556	FBgn0008636	hbn	0	0	0	0	0	0	0	0	0	0	0	0	NA
FBtr0071559	FBgn0040653	IM4	0	0	0	0	0	0	0	0	0	0	0	0	NA
FBtr0071560	FBgn0034553	CG9993	0	0	0	0	0	0	0	0	0	0	0	0	NA
FBtr0071561	FBgn0034552	CG17999	0	0	0	0	0	0	0	0	0	0	0	0	NA
FBtr0071562	FBgn0011674	insc	4.25495	6.02256	5.93517	4.43799	4.53154	5.52073	4.68777	4.67651	4.35114	3.82264	3.72967	4.04858	0.206965
FBtr0071563	FBgn0016984	sktl	58.9783	54.8606	58.1873	69.0397	62.0478	60.4719	56.7595	64.6427	60.7812	61.4287	71.3334	74.4196	0.228211
FBtr0071567	FBgn0034588	CG9394	0	0	0	0	0	0	0	0	0	0	0	0	NA
FBtr0071569	FBgn0002736	mago	176.477	176.581	163.707	162.139	168.85	156.978	158.953	170.075	165.993	181.445	155.712	157.908	0.442398
FBtr0071570	FBgn0034592	CG9406	0	0	0	0	0	0	0	0	0	0	0	0	NA
FBtr0071573	FBgn0026582	Hmg-2	53.4464	52.5685	48.2267	48.4387	50.0097	53.4186	54.224	53.9136	46.7211	53.8353	48.8902	50.2879	0.467843
FBtr0071574	FBgn0050208	tRNA:CR30208	0	0	0	0	0	0	0	0	0	0	0	0	NA
FBtr0071575	FBgn0034599	hng1	57.8224	50.2742	55.9839	48.3685	50.9452	52.743	52.1447	57.39	51.895	59.36	48.736	51.7711	0.469772
FBtr0071576	FBgn0261850	Xpd	55.7752	60.4822	57.7968	56.2186	54.8273	60.1308	60.7965	63.3269	58.7861	56.4966	61.3896	65.3282	0.469772
FBtr0071578	FBgn0003162	Pu	2.19502	3.38055	2.45741	1.34064	1.74588	2.38184	3.14692	2.66833	2.33746	1.37704	1.94972	1.90699	0.402282
FBtr0071579	FBgn0003162	Pu	0.215852	0	0	0.516984	0	0	0.22594	0	0	0.1905	0.356801	0	NA
FBtr0071580	FBgn0003162	Pu	0.706275	0.985624	0.623278	0.206734	1.27925	0.888941	0.733959	0.850452	0.505428	0.866495	1.06234	0.844046	0.733652
FBtr0071581	FBgn0011872	tRNA:G3:57BCb	0	0	0	0	0	0	0	0	0	0	0	0	NA
FBtr0071582	FBgn0003891	tud	73.019	76.5815	74.5861	105.058	90.5973	102.723	81.0737	70.0216	98.8392	100.659	118.944	112.459	0.00523066
FBtr0071583	FBgn0034602	Lapsyn	0.0320392	0	0	0	0.0351169	0	0.0322633	0.0600539	0	0.0317424	0	0	NA
FBtr0071589	FBgn0034611	MFS16	40.2062	34.3515	35.7966	30.7529	32.8636	34.5269	38.2493	41.7327	33.3905	35.7539	31.8796	33.2809	0.307727
FBtr0071590	FBgn0034611	MFS16	4.00434	6.13631	3.84531	5.12116	4.47745	4.43766	3.67609	2.56213	5.96738	3.45685	3.96208	4.14249	0.57217
FBtr0071591	FBgn0034611	MFS16	0.575107	0.606619	1.47878	0.942803	0.840495	1.25663	1.16876	0.866686	1.38263	1.01241	1.39192	1.18997	0.586336
FBtr0071592	FBgn0016726	RpL29	2954.64	2958.26	3046.07	2613.81	2768.21	2679.46	2923.65	3080.6	2877.98	2943.29	2383.97	2538.41	0.182469
FBtr0071593	FBgn0016726	RpL29	166.533	141.889	184.688	188.851	184.563	170.277	150.254	155.232	175.467	182.737	180.87	188.278	0.4866
FBtr0071599	FBgn0034618	CG9485	18.9674	14.5458	14.6493	22.0961	11.1644	15.8794	14.0832	11.2387	13.0111	12.6386	24.5433	22.9773	0.854991
FBtr0071600	FBgn0034618	CG9485	39.1031	50.16	46.3536	45.3303	47.4683	55.5196	43.6234	45.6605	43.7751	37.0348	51.0184	52.8284	1
FBtr0071601	FBgn0034618	CG9485	5.26824	6.48128	5.01347	9.17371	3.9412	7.61696	10.8628	6.82751	8.51648	10.5123	9.37736	8.6752	0.615826
FBtr0071602	FBgn0020306	dom	0.313657	1.25188	6.58e-07	1.85854	0.951878	1.71981	1.14952	1.12035	1.51364	2.3332	2.88035	1.16585	0.28244
FBtr0071603	FBgn0020306	dom	75.7848	81.9663	81.5499	104.331	75.7493	108.521	80.3869	71.0182	72.1639	67.998	144.209	122.969	0.446627
FBtr0071604	FBgn0020306	dom	188.242	219.721	200.602	230.191	179.467	240.749	197.052	189.264	188.401	168.01	307.511	268.246	0.617476
FBtr0071606	FBgn0034628	Acox57D-p	42.7411	44.6345	47.3273	43.7286	41.1945	42.2997	44.8351	42.2981	48.5602	41.385	45.0892	41.0004	0.424096
FBtr0071607	FBgn0034629	Acox57D-d	46.7768	57.4685	55.9862	56.0891	56.1027	61.1715	56.2366	55.4094	50.3505	54.2123	49.9716	54.3695	1
FBtr0071608	FBgn0034627	EfSec	8.45914	8.67369	6.14997	6.54552	8.06445	6.6181	7.08232	8.41387	6.09725	8.5415	5.08303	6.97132	0.542646
FBtr0071609	FBgn0034626	CG10795	109.105	93.9062	104.47	82.2009	85.3764	85.6322	97.3914	102.542	91.8513	92.0808	81.4728	84.8925	0.0956363
FBtr0071610	FBgn0000395	cv-2	0.0681935	0	0	0	0.0124131	0	0	0	0.0217909	0	0.0357787	0.0119625	NA
FBtr0071611	FBgn0034624	CG17974	0	0	0	0	0	0	0	0	0	0	0	0	NA
FBtr0071612	FBgn0034623	CG9822	0	0	0	0	0	0	0	0	0	0	0	0	NA
FBtr0071613	FBgn0050394	CG30394	1.36865	0.928015	0.966102	0.407588	0.320247	1.83346	0.560781	4.32443	2.13255	1.8775	1.28399	0	0.592563
FBtr0071614	FBgn0050394	CG30394	38.2114	36.8067	37.0156	36.0834	34.9738	33.8092	35.0986	32.576	33.8582	35.4446	38.8665	42.0244	0.488608
FBtr0071615	FBgn0034617	CG9754	49.4302	44.1431	46.4799	48.3907	46.2597	50.3053	43.9214	46.0821	46.2614	48.3683	48.9098	50.1845	0.469513
FBtr0071616	FBgn0034614	CG9752	115.421	122.386	113.448	114.434	116.359	112.464	106.139	101.259	122.575	124.835	96.6644	96.9897	0.457751
FBtr0071617	FBgn0050390	Sgf29	42.1805	39.3096	44.3237	40.4902	41.3687	39.621	46.7887	43.8102	45.6411	44.9685	43.7426	36.1728	0.500068
FBtr0071618	FBgn0050392	CG30392	22.1847	17.6366	18.0361	28.081	32.1006	28.6722	20.3969	20.8633	34.344	20.042	21.4863	28.5574	0.44384
FBtr0071619	FBgn0034612	CG10505	0.0559837	0.429685	0.177106	0.024038	0.123462	0.23725	0.123748	0.293879	0.182255	0.0442263	0.153219	0.0826312	0.552672
FBtr0071620	FBgn0050393	CG30393	0	0	0	0	0	0	0	0	0	0	0	0	NA
FBtr0071621	FBgn0050391	CG30391	0	0	0	0	0	0	0	0	0	0	0	0	NA
FBtr0071622	FBgn0034606	ASPP	0.0533701	0	0.0337088	0	0	0	0	0	0	0	0	0	NA
FBtr0071623	FBgn0034606	ASPP	0	0.0617478	0	0.0239779	0.0122865	0.0250916	0	0	0.0107845	0	0	0	NA
FBtr0071624	FBgn0034605	CG15661	0	0	0.0298618	0	0	0	0	0	0	0	0	0	NA
FBtr0071625	FBgn0027073	CG4302	0	0	0	0.0315838	0.0323948	0	0	0	0	0	0	0	NA
FBtr0071626	FBgn0050209	tRNA:CR30209	0	0	0	0	0	0	0	0	0	0	0	0	NA
FBtr0071627	FBgn0034601	CG4286	0.704494	0.771499	0.372264	0.378221	0.544072	0.314761	0.851703	0.330193	0.474399	0.419616	0.0745694	0.298079	0.534237
FBtr0071628	FBgn0261067	LSm1	119.857	100.952	97.3333	105.835	105.011	102.129	121.425	114.707	107.125	124.309	92.848	102.749	0.869288
FBtr0071629	FBgn0034598	CG4266	102.677	97.932	96.1572	115.821	89.2576	107.179	101.272	94.2917	91.4823	93.8981	143.673	130.87	0.47064
FBtr0071630	FBgn0011871	tRNA:G3:57BCa	0	0	0	0	0	0	0	0	0	0	0	0	NA
FBtr0071631	FBgn0050206	tRNA:CR30206	0	0	0	0	0	0	0	0	0	0	0	0	NA
FBtr0071632	FBgn0050389	CG30389	34.5427	34.0222	38.7069	35.8373	33.063	34.1005	34.11	38.3745	37.2059	33.3216	37.8966	37.9423	0.482429
FBtr0071633	FBgn0050389	CG30389	0.221451	0	0	0	0	0.482695	0.251557	0	0	0	0.244031	0	NA
FBtr0071635	FBgn0034595	CG15657	0	0.742131	0	1.4435	0.374285	0	0.678312	0	0	0	1.05568	0.717125	NA
FBtr0071636	FBgn0034590	Magi	18.7279	24.787	22.7315	29.2985	20.2395	22.128	17.2455	20.5484	25.1484	18.0487	27.8356	29.9597	0.764349
FBtr0071637	FBgn0020312	CG4050	61.6871	68.2335	68.2556	58.8164	56.9859	60.2616	70.3818	67.0657	62.2309	55.4806	62.247	67.3812	0.219309
FBtr0071638	FBgn0020312	CG4050	0.799532	0.253352	0	0.462473	0.643724	0.457545	0.193475	2.78411	0.350747	0.696398	1.18947	0.407824	0.387145
FBtr0071639	FBgn0011824	CG4038	102.021	98.4158	109.406	96.3665	97.359	95.0629	100.878	105.135	96.4394	94.8748	99.3735	101.736	0.352827
FBtr0071640	FBgn0034585	Rbpn-5	86.246	80.3253	84.755	80.5187	84.2572	81.8902	90.6532	87.7025	84.9735	92.5292	75.784	89.1533	0.934495
FBtr0071641	FBgn0026369	Sara	63.9348	65.8474	67.5819	64.6539	64.3887	72.0327	69.6705	70.515	68.9459	65.575	72.6659	73.0689	0.446627
FBtr0071653	FBgn0003731	Egfr	0.0256889	0.009401	0.0180256	0.00912241	0.028043	0	0.0603432	0.0561691	0.0328297	0.0423668	0.089817	0.0360423	NA
FBtr0071654	FBgn0003731	Egfr	0	0	0	0	0	0.0354721	0	0	0	0	0	0	NA
FBtr0071658	FBgn0034641	mahj	83.7312	89.7212	93.5907	94.504	86.0041	97.0285	92.7472	88.9016	91.9823	82.6243	100.62	103.124	0.492279
FBtr0071659	FBgn0034642	CG15674	0	0	0	0	0	0	0.0683754	0.123082	0	0	0	0	NA
FBtr0071660	FBgn0034643	CG10321	52.3256	57.1522	53.6867	50.0596	47.4907	51.9144	51.0909	54.4846	54.2051	43.5047	55.7137	53.4749	0.263632
FBtr0071661	FBgn0034644	CG10082	21.7841	24.4623	21.2586	23.5226	22.266	25.2345	20.1903	19.5333	18.2295	18.6285	26.3548	25.5045	1
FBtr0071662	FBgn0034644	CG10082	0.208699	0	0.371856	0.200595	0.245202	1.16291	0.521376	0.551892	0.329789	0.88521	0.824877	0.287548	0.429363
FBtr0071663	FBgn0034645	CG10320	1.98162	1.07699	1.83609	0.975014	3.85365	0	0	0.799581	0.928091	0	2.14129	0	0.463995
FBtr0071666	FBgn0034650	NC2alpha	178.754	163.945	169.509	148.53	163.28	154.05	184.119	177.4	162.46	177.551	136.076	155.845	0.386695
FBtr0071668	FBgn0034651	CG15676	0.668487	0.522844	0	0	0.00255427	0.214592	0	0	0.55307	0.284747	0.205126	0	NA
FBtr0071670	FBgn0034654	CG10306	374.638	350.579	338.422	317.997	343.195	332.787	354.11	370.153	377.212	399.484	320.362	341.053	0.597454
FBtr0071671	FBgn0034655	CG10307	0	0	0	0	0	0	0	0	0.112636	0	0	0	NA
FBtr0071672	FBgn0050290	Ppcdc	45.1931	42.2343	45.6523	39.5605	39.5923	41.1248	44.4527	43.3545	46.7619	39.5292	41.6683	41.6841	0.326495
FBtr0071673	FBgn0010228	HmgZ	0	0.185558	0	0	0.187511	0.0947121	0	0	0	0	0	0	NA
FBtr0071674	FBgn0010228	HmgZ	0	0	0	0	0	0	0	0	0.08739	0	0.0966223	0	NA
FBtr0071675	FBgn0266346	CngB	0	0	0	0	0	0	0	0	0	0	0	0	NA
FBtr0071676	FBgn0027360	Tim10	158.139	159.791	159.13	129.451	143.521	140.113	164.468	158.098	147.947	155.887	126.92	134.208	0.174659
FBtr0071677	FBgn0027360	Tim10	2.27261	2.65191	3.81028	6.27573	4.9475	2.83567	4.24605	1.86003	4.05234	3.06273	1.76098	3.03066	0.71819
FBtr0071678	FBgn0050285	CG30285	0	0	0	0	0.246314	0.12395	0.111705	0.207893	0	0.110239	0.118013	0	NA
FBtr0071679	FBgn0003687	Tbp	123.447	109.653	117.054	105.418	109.682	112.411	113.632	112.322	113.011	107.344	110.877	108.642	0.286871
FBtr0071680	FBgn0034649	CG9865	24.5514	23.524	22.9382	20.5672	19.9826	20.5419	23.4843	21.8878	23.031	21.8659	23.5691	23.1321	0.359412
FBtr0071681	FBgn0034649	CG9865	2.358	3.50942	3.21235	1.92934	2.50181	1.56483	2.73561	3.29982	3.53047	3.72899	3.24502	3.47598	1
FBtr0071682	FBgn0034647	pirk	0	0.180544	0.217112	0.0880761	0.0903856	0.0918921	0.124379	0.0385834	0.0395335	0.0408049	0	0.173751	NA
FBtr0071683	FBgn0034646	Rae1	109.321	121.039	104.906	104.861	113.092	108.796	104.319	118.827	110.966	111.322	106.733	107.743	0.441572
FBtr0071684	FBgn0050284	CG30284	0	0	0	0	0	0	0	0	0	0	0	0	NA
FBtr0071685	FBgn0050284	CG30284	0	0	0	0	0	0	0	0	0	0	0	0	NA
FBtr0071686	FBgn0016641	PTP-ER	61.8827	69.0172	63.6437	68.2806	60.607	73.714	63.5044	65.8983	62.1033	55.5332	79.8115	76.2718	0.895828
FBtr0071687	FBgn0000326	clt	23.9967	24.9114	24.0206	25.8666	23.462	25.7733	28.1672	28.3934	26.3584	25.0175	27.6571	26.3548	0.455708
FBtr0071688	FBgn0042180	CG18870	82.9174	82.5158	90.6417	80.7555	79.5045	87.163	77.4916	84.6391	85.4534	83.2124	88.7708	87.1464	0.45265
FBtr0071690	FBgn0034638	CG10433	0	0	0	0	0	0	0	0	0.0572141	0.0590462	0.0628924	0	NA
FBtr0071691	FBgn0034638	CG10433	0	0	0	0	0	0	0	0.0922716	0	0	0	0	NA
FBtr0071692	FBgn0034636	CG10440	0	0	0	0	0	0	0	0	0	0	0	0	NA
FBtr0071695	FBgn0050287	CG30287	0	0	0	0	0	0	0	0	0	0	0	0	NA
FBtr0071697	FBgn0050289	CG30289	0.0467081	0	0	0.100002	0	0.260692	0	0	0	0.0463107	0.049267	0.197231	NA
FBtr0071699	FBgn0034634	CG10494	5.18883	7.16439	6.44716	6.56892	5.27343	5.79889	7.15437	4.43688	6.95765	6.02897	4.97496	3.85837	0.452993
FBtr0071700	FBgn0034634	CG10494	43.7279	44.9135	42.4456	33.5689	39.0545	43.2273	43.4985	45.0867	39.4158	44.461	44.128	40.9596	0.459739
FBtr0071701	FBgn0034631	TAF1C-like	35.0513	35.6845	38.7982	35.5001	36.4924	38.852	37.8062	35.4451	35.4339	36.742	37.2962	38.3154	0.467536
FBtr0071703	FBgn0010470	Fkbp14	32.6729	39.481	28.1912	33.0161	35.9154	30.3616	31.3626	34.3645	33.0198	31.8129	31.0689	30.6645	0.528544
FBtr0071706	FBgn0010415	Sdc	13.8774	12.6931	14.6116	20.5369	19.0316	15.3075	15.6914	15.4887	15.788	14.7633	22.3992	18.2104	0.238204
FBtr0071707	FBgn0010415	Sdc	0.462806	0.867938	0.610634	0.911939	0.743894	0.565003	0.8884	0.587894	0.399478	0.659688	1.15264	1.57752	0.552466
FBtr0071708	FBgn0004362	HmgD	289.517	268.528	278.687	351.43	326.062	263.332	264.198	265.647	334.133	313.59	350.72	313.626	0.434394
FBtr0071709	FBgn0004362	HmgD	72.2826	64.6526	76.912	91.1654	87.6004	74.1625	75.0035	68.3744	74.6186	73.0782	97.2301	99.3031	0.290481
FBtr0071710	FBgn0050398	CG30398	0.107702	0.590123	0.397941	0.230798	0.118494	0.180369	0.325451	0.201899	0.155258	0.160237	0.0568607	0.341293	NA
FBtr0071711	FBgn0034657	LBR	10.1032	6.12085	7.88318	7.98285	7.8096	6.4738	7.91959	6.87716	6.92387	6.28369	11.4368	9.09414	0.745269
FBtr0071712	FBgn0034657	LBR	153.893	160.478	151.044	171.475	160.574	165.109	150.768	146.548	151.089	149.401	202.87	183.071	0.397992
FBtr0071713	FBgn0034657	LBR	0	0.938875	0	0	0.732115	0	0	0.504378	0	0	0	0	NA
FBtr0071714	FBgn0034658	Grx-1	0	0	0	0	0	0	0	0	0	0	0	0	NA
FBtr0071716	FBgn0034659	CG4021	0	0	0	0	0	0	0.0453922	0	0	0	0	0	NA
FBtr0071720	FBgn0034666	CG9294	0	0	0	0	0	0	0	0	0	0	0	0	NA
FBtr0071723	FBgn0034670	CG13488	0	0	0	0	0	0	0	0	0	0	0	0	NA
FBtr0071726	FBgn0034674	CG9304	46.8557	50.9253	48.247	47.3674	44.2707	52.0894	46.3663	45.8343	45.8431	43.6007	52.3235	55.3171	0.522482
FBtr0071727	FBgn0041237	Gr58c	0	0	0	0	0	0	0	0	0	0	0	0	NA
FBtr0071728	FBgn0041239	Gr58a	0	0	0	0	0	0	0	0	0	0	0	0	NA
FBtr0071731	FBgn0050401	CG30401	0.682613	0.244306	0.442758	0.215547	0.689867	1.70316	0	1.075	1.34565	2.51194	0.985432	2.32174	0.484004
FBtr0071732	FBgn0041238	Gr58b	0	0	0	0	0	0	0	0	0	0	0	0	NA
FBtr0071733	FBgn0034671	CG13494	0	0	0	0	0	0	0	0	0	0	0	0	NA
FBtr0071734	FBgn0025573	PpN58A	0	0	0	0	0	0.153693	0	0	0.0881753	0	0	0	NA
FBtr0071735	FBgn0034667	comr	0	0	0	0	0	0	0	0	0	0	0	0	NA
FBtr0071736	FBgn0050406	tRNA:CR30406	0	0	0	0	0	0	0	0	0	0	0	0	NA
FBtr0071737	FBgn0050407	tRNA:CR30407	0	0	0	0	0	0	0	0	0	0	0	0	NA
FBtr0071738	FBgn0034665	CG4372	0	0	0	0	0	0	0	0	0	0	0	0	NA
FBtr0071739	FBgn0034664	CG4377	0	0	0	0	0	0	0	0	0	0	0	0	NA
FBtr0071740	FBgn0034663	CG4363	0	0	0	0	0	0	0	0	0	0	0	0	NA
FBtr0071743	FBgn0034661	CG4386	0	0	0	0	0	0	0	0	0	0	0	0	NA
FBtr0071744	FBgn0042098	CG18735	0	0	0	0	0	0	0	0	0	0	0	0	NA
FBtr0071745	FBgn0034660	lox2	0	0	0	0	0	0	0	0	0	0	0	0	NA
FBtr0071746	FBgn0050404	Tango11	12.3788	15.8881	1.91488	15.5557	23.8736	12.8222	9.36935	10.107	12.8423	9.59877	13.9328	18.9259	0.459739
FBtr0071747	FBgn0050404	Tango11	108.647	104.072	119.757	102.314	101.684	112.719	109.433	105.412	95.7991	111.741	109.878	106.46	0.459434
FBtr0071749	FBgn0034681	CG9308	0	0	0	0	0	0	0	0	0	0	0	0	NA
FBtr0071755	FBgn0067102	GlcT-1	51.8024	61.6939	56.4256	57.8041	55.5208	62.0356	54.4381	60.9581	57.3743	50.5229	61.053	65.4177	0.637422
FBtr0071756	FBgn0034691	Synj	41.8526	46.5073	41.8278	52.3877	46.0896	54.7365	41.9	41.0197	42.1056	36.5729	64.2992	62.8692	0.455574
FBtr0071757	FBgn0034691	Synj	3.6514	1.9766	3.50759	4.57196	3.94348	3.95415	2.91307	3.12992	3.67901	2.08094	3.14368	3.691	0.879383
FBtr0071758	FBgn0034694	CG6613	43.8932	48.3948	46.2809	43.5211	42.2338	46.0132	47.807	52.8333	44.0134	42.2984	44.117	45.7054	0.352612
FBtr0071760	FBgn0050281	CG30281	0	0	0	0	0	0	0	0.051765	0	0	0	0	NA
FBtr0071761	FBgn0002715	mei-S332	0.0149193	1.00838	2.34928	2.59839	2.77585	5.7677	1.68299	0.208185	7.10045	0.42392	5.82e-05	0.757979	0.952088
FBtr0071762	FBgn0029147	NtR	8.09e-09	0	4.74e-09	0	0.180595	0	0	4.21e-09	0	4.7e-09	0.0289067	0	NA
FBtr0071763	FBgn0000008	a	3.67201	8.67905	6.25297	8.93278	8.59083	5.32224	5.61848	5.9175	5.70536	5.87385	10.2137	14.2419	0.446627
FBtr0071764	FBgn0000008	a	0.487647	0.631589	0.515624	0.603792	0.456741	0.0938059	0.508651	0.161448	0.386336	0.520399	0.3522	0.439739	0.660658
FBtr0071765	FBgn0034700	CG11269	0.185024	0	0.394476	0.201191	0	0.207798	0.186394	0.174132	0	0	0.398318	0.19769	NA
FBtr0071766	FBgn0029084	gom	0.0407436	0.53607	0.214873	0.392245	0.134174	0.090946	0.246198	0.229119	0.156504	0.121153	0.687008	0.257938	0.673909
FBtr0071767	FBgn0034704	CG6758	47.8192	46.3632	49.2133	52.0185	51.1336	52.8115	48.5322	53.2245	53.5225	46.7421	53.8538	56.3927	0.428988
FBtr0071769	FBgn0034706	CG11275	0.469822	0.824519	0.495242	1.80706	1.75063	2.79586	1.04083	1.26223	0.931898	2.11005	2.14258	1.78318	0.0834557
FBtr0071770	FBgn0034707	MED16	25.0382	24.918	25.0268	22.7803	23.373	26.4032	23.9066	24.4544	23.4181	23.2551	26.9697	23.6625	0.442398
FBtr0071771	FBgn0034708	Vps35	2.78558	2.72275	2.02248	4.83888	4.12457	3.31459	2.78823	2.29104	3.01767	3.27858	4.37205	3.29328	0.278163
FBtr0071772	FBgn0034708	Vps35	70.7789	71.1998	69.9574	79.3877	75.0703	82.2214	74.7995	74.3427	71.3438	75.2888	85.4386	85.7622	0.226715
FBtr0071773	FBgn0034713	CG11291	0	0	0	0	0	0	0	0	0	0	0	0	NA
FBtr0071774	FBgn0025186	ari-2	79.8035	81.9512	77.9346	93.2882	85.1851	93.0294	76.7343	75.1587	71.11	71.0912	104.232	100.282	0.459291
FBtr0071775	FBgn0020307	dve	0	0.0109715	0	0	0	0	0	0	0	0	0	0	NA
FBtr0071776	FBgn0020307	dve	0	0	0	0	0.0156337	0	0	0	0	0	0	0.0150623	NA
FBtr0071777	FBgn0034716	Oatp58Dc	0	0	0	0	0	0	0	0	0	0	0	0	NA
FBtr0071779	FBgn0050277	Oatp58Da	0	0	0	0	0	0	0	0	0	0	0	0	NA
FBtr0071780	FBgn0050278	CG30278	0	0	0	0	0	0	0	0	0	0	0	0	NA
FBtr0071781	FBgn0034712	CG3264	0	0	0	0	0	0	0	0	0	0	0	0	NA
FBtr0071782	FBgn0034711	CG3290	0	0	0	0	0	0	0	0	0	0	0	0	NA
FBtr0071783	FBgn0034710	CG3292	0	0	0	0	0	0	0	0	0	0	0	0	NA
FBtr0071784	FBgn0034709	Swim	0	0	0	0	0	0	0	0	0	0	0	0	NA
FBtr0071785	FBgn0034709	Swim	0	0	0	0	0	0	0.0259761	0	0	0	0	0	NA
FBtr0071786	FBgn0034705	CG11170	28.0578	26.6832	24.9642	25.0335	25.7944	28.2322	27.2086	30.2485	25.9497	28.0866	25.3346	26.1711	0.484404
FBtr0071787	FBgn0034703	CG3045	47.1072	46.5473	50.8123	47.1821	49.2561	50.8134	49.4879	45.7934	48.4004	48.5633	45.057	49.8959	0.480086
FBtr0071790	FBgn0034697	GM130	54.9843	54.7285	55.3434	50.3192	52.332	55.1722	56.0107	60.4381	56.5568	53.4497	51.3759	53.162	0.360348
FBtr0071791	FBgn0243516	Vrp1	2.42137	1.82463	1.79744	2.54755	2.2586	3.54894	2.03674	2.03341	1.12496	2.33941	3.04583	3.13585	0.435146
FBtr0071792	FBgn0243516	Vrp1	35.0872	40.3802	34.4754	39.6913	35.3961	38.619	34.1464	35.85	33.401	32.6454	50.1826	47.738	0.550861
FBtr0071793	FBgn0243516	Vrp1	13.0363	14.6813	13.6964	19.2112	14.6118	16.4895	14.3055	9.82866	14.1866	11.5946	21.0634	19.7116	0.46095
FBtr0071794	FBgn0243516	Vrp1	0	0	0	0	0	0	0	0	0	0	0	0	NA
FBtr0071795	FBgn0243516	Vrp1	0	0	0	0	0	0	0	0	0	0	0	0	NA
FBtr0071796	FBgn0243516	Vrp1	0	0	0	0	0	0	0	0	0	0	0	0	NA
FBtr0071797	FBgn0034693	CG11073	0	0	0	0	0	0	0	0	0	0	0	0	NA
FBtr0071799	FBgn0034692	CG13502	0.0356958	0	0	0	0.0782991	0	0	0	0	0	0.0375905	0	NA
FBtr0071800	FBgn0034689	CG2921	74.547	70.4053	71.8863	69.2264	72.4511	70.9701	75.7293	78.0035	77.6554	74.0216	69.2261	74.0083	0.459291
FBtr0071802	FBgn0034688	CG11474	103.536	93.3124	94.5037	94.2451	96.3811	89.3452	101.537	92.4793	93.6159	102.809	91.6084	85.6963	0.490495
FBtr0071803	FBgn0034687	CG11475	0.235046	0.184133	0.2478	0.322967	0.44176	0.299747	0.202881	0.220285	0.25785	0.299426	0.318143	0.283261	0.609007
FBtr0071804	FBgn0034684	CG13501	0.0330872	0.0362891	0	0	0.0362722	0	0	0.0310093	0	0.065565	0.0348301	0	NA
FBtr0071805	FBgn0034683	CG13500	0	0	0	0	0	0	0	0	0	0	0	0	NA
FBtr0071806	FBgn0005778	PpD5	0	0	0	0	0	0	0	0	0	0	0	0	NA
FBtr0071811	FBgn0034717	CG5819	0	0	0	0	0	0	0	0	0	0	0	0	NA
FBtr0071812	FBgn0034717	CG5819	0	0	0	0	0	0	0	0	0	0	0	0	NA
FBtr0071813	FBgn0013272	Gp150	0	0	0	0	0	0.338698	0.10584	0	0.101061	0	0	0.133674	NA
FBtr0071814	FBgn0013272	Gp150	0	0	0	0	0	0	0	0	0	0	0	0	NA
FBtr0071815	FBgn0013272	Gp150	0	0	0	0	0	0	0	0	0	0	0	0.0965112	NA
FBtr0071816	FBgn0013272	Gp150	0	1.94e-10	0	1.75e-10	1.46e-10	0	0	0	0	0	0	0	NA
FBtr0071819	FBgn0034721	CG11298	0	0	0	0	0	0	0	0	0	0	0	0	NA
FBtr0071820	FBgn0034722	Rtf1	127.129	131.827	118.434	114.745	113.218	118.276	118.555	117.334	99.3534	112.156	126.269	116.561	0.26037
FBtr0071821	FBgn0025878	wrapper	0.0259667	0	0	0.0277241	0	0.0289693	0	0	0.074742	0.0257181	0.0273059	0	NA
FBtr0071822	FBgn0034723	CG13506	0.0676726	0	0	0.0360843	0.0554827	0.0377395	0.034067	0.0317092	0	0.083741	0.0177674	0.089075	NA
FBtr0071823	FBgn0034725	CG6044	0.0355357	0.116912	0	0	0.194864	0.277585	0.0357859	0.0999135	0.102343	0.0704258	0.074842	0.149913	NA
FBtr0071826	FBgn0053200	ventrally-expressed-protein-D	0	0	0	0	0	0	0	0	0	0	0	0	NA
FBtr0071827	FBgn0034726	Mes4	110.789	101.273	113.937	91.1167	95.5612	86.3309	106.593	109.01	108.226	106.477	89.9489	91.1609	0.206111
FBtr0071828	FBgn0022985	qkr58E-2	110.29	105.597	103.752	105.721	101.026	112.057	103.64	101	95.7451	99.5748	113.086	115.231	0.459739
FBtr0071830	FBgn0034730	ppk12	0	0.0333457	0	0.0324759	0.066622	0	0	0.0284906	0	0	0	0.032048	NA
FBtr0071832	FBgn0034733	CG4752	15.3534	20.0532	17.3083	18.3391	18.957	24.561	19.6354	18.4272	18.6269	15.1957	24.1891	22.6359	0.518053
FBtr0071833	FBgn0034734	CG4554	31.6864	32.8053	32.0092	35.836	33.5708	38.0523	35.7249	34.0561	33.8051	33.4865	35.9375	38.8986	0.326746
FBtr0071834	FBgn0034735	CG4610	44.6233	44.6854	44.9385	39.0321	39.7316	41.1447	41.8919	47.0435	42.2497	40.3831	39.389	38.4251	0.15756
FBtr0071835	FBgn0034736	CG6018	0.052565	0	0.0553907	0.0280624	0.0287786	0.0586437	0.105858	0.024631	0.0252175	0	0.0276393	0.0553951	NA
FBtr0071836	FBgn0034737	CG11362	0.0768248	0	0	0	0	0	0	0.144035	0.0739321	0.0762901	0	0.0813074	NA
FBtr0071837	FBgn0260866	dnr1	1.63972	8.7663	2.31052	4.16697	2.3503	4.961	1.09162	0.811412	1.10895	0.626661	2.61855	2.67192	0.624568
FBtr0071838	FBgn0003175	px	32.5903	36.4691	34.4521	49.1814	35.2861	48.4679	36.2242	32.0542	33.1895	30.5229	70.0651	56.2427	0.384729
FBtr0071840	FBgn0034729	CG10344	6.90612	2.90529	5.04395	2.96451	5.64746	6.63252	8.16363	6.80496	8.86915	5.55062	3.78437	2.18787	0.71545
FBtr0071841	FBgn0034729	CG10344	46.0817	50.9772	45.6937	40.4896	43.6546	42.4901	40.2711	49.8352	34.4551	40.816	36.7739	48.1724	0.26708
FBtr0071842	FBgn0034727	mRpS29	86.6796	85.1816	87.8761	74.7982	85.1277	86.8485	90.8804	93.7729	84.1358	90.959	75.5433	82.513	0.459434
FBtr0071843	FBgn0022986	qkr58E-1	74.0178	77.3056	78.4643	64.1344	69.7659	71.4094	77.8508	77.2333	77.7331	69.8448	70.795	65.9725	0.174674
FBtr0071845	FBgn0034724	babos	0	0	0	0	0.0538869	0	0	0	0	0	0	0	NA
FBtr0071846	FBgn0034720	Liprin-gamma	0.414161	0.828522	0.58297	0.593033	1.62e-09	0.465688	0.655632	0.478791	0.731922	0.430785	0.742147	0.949447	1
FBtr0071847	FBgn0034720	Liprin-gamma	0	0	0	0	0	0	0	0	0	0	0	0	NA
FBtr0071848	FBgn0017482	T3dh	2.18166	2.71036	2.24268	1.46144	1.37728	2.17002	2.33637	2.25278	1.9868	2.28748	2.16958	1.90835	0.508937
FBtr0071849	FBgn0034718	wdp	0	0	0	0	0	0	0	0	0	0	0	0	NA
FBtr0071850	FBgn0034718	wdp	0	0	0	0	0	0	0	0	0	0	0	0	NA
FBtr0071851	FBgn0034718	wdp	0	0	0	0	0	0	0	0	0	0	0	0	NA
FBtr0071852	FBgn0034718	wdp	0	0.000394106	0	0	0	0	0	0	0	0	0	0.000315344	NA
FBtr0071853	FBgn0034739	CG3927	0	0	0	0	0	0	0	0	0.049076	0	0.0539065	0	NA
FBtr0071854	FBgn0034741	CG4269	0	0	0	0	0	0	0	0	0	0	0	0	NA
FBtr0071855	FBgn0034743	RpS16	2847.61	2909.86	2935.58	2566.43	2652.66	2688.75	2767.79	2927.81	2730.42	2773.19	2494.45	2568.63	0.17679
FBtr0071856	FBgn0034744	Vps20	128.026	128.477	132.186	100.09	118.939	112.806	125.986	142.468	116.786	121.641	95.2668	102.021	0.15544
FBtr0071858	FBgn0053143	CG33143	0	0.0112479	0	0	0	0	0	0	0	0.0202793	0	0.0107831	NA
FBtr0071860	FBgn0026261	bonsai	125.056	128.414	127.475	118.115	131.706	117.951	134.401	135.846	127.76	147.841	112.916	128.219	0.846457
FBtr0071861	FBgn0034740	nsr	0	0.00733077	0.0460621	0.0467223	0	0	0.043974	0	0.0419361	0.043284	0.0460337	0	NA
FBtr0071862	FBgn0034758	CG13510	0	0	0	0	0	0	0.108909	0	0	0	0.115015	0	NA
FBtr0071863	FBgn0034759	CG13511	0	0	0	0	0	0	0	0	0	0	0	0	NA
FBtr0071865	FBgn0034761	CG4250	0.202379	0	0	0.545218	0.336666	0.22621	0.713777	0.0948701	0.389948	0	0	0.643823	NA
FBtr0071867	FBgn0050269	CG30269	0	0	0	0	0	0	0	0.103464	0	0	0	0	NA
FBtr0071868	FBgn0034763	RYBP	105.179	104.422	104.303	97.3458	93.1796	101.964	104.547	107.069	99.7104	102.972	100.952	101.436	0.359412
FBtr0071870	FBgn0034766	Obp59a	0	0	0	0	0	0	0	0	0	0	0	0	NA
FBtr0071871	FBgn0034768	Obp58b	0	0	0	0	0	0	0	0	0	0	0	0	NA
FBtr0071872	FBgn0034770	Obp58d	0	0	0	0	0	0	0	0	0	0	0	0	NA
FBtr0071878	FBgn0034774	CG13526	0	0	0	0	0	0	0	0	0	0	0	0	NA
FBtr0071880	FBgn0034776	CG13527	0	0	0	0	0	0	0	0	0	0	0	0	NA
FBtr0071883	FBgn0011211	blw	700.094	756.553	722.85	918.362	908.833	936.586	738.372	642.698	785.749	722.89	1087.34	1004.08	0.173478
FBtr0071888	FBgn0050274	CG30274	0	0	0	0	0	0	0	0	0	0	0	0	NA
FBtr0071890	FBgn0050272	CG30272	0	0	0	0	0	0	0	0	0	0	0	0	NA
FBtr0071891	FBgn0050265	CG30265	0	0	0	0	0	0	0	0	0	0	0	0	NA
FBtr0071893	FBgn0034783	CG9825	0	0	0	0	0	0	0	0	0	0	0	0	NA
FBtr0071894	FBgn0034784	CG9826	0	0	0	0	0	0	0	0	0.0579424	0	0	0	NA
FBtr0071897	FBgn0010078	RpL23	3659.03	3683.76	3693.69	3020.7	3318.08	3219.22	3583.02	3770.01	3459.74	3505.75	2932.47	3095.17	0.133881
FBtr0071898	FBgn0004896	fd59A	0	0	0	0.0243718	0	0	0	0	0	0	0	0	NA
FBtr0071899	FBgn0034788	CG13532	0	0	0	0	0	0	0	0.0502909	0	0	0.0282188	0	NA
FBtr0071900	FBgn0034789	PIP5K59B	0.658488	0.81912	0.523922	1.21688	0.959441	1.17505	0.662957	0.740487	0.898044	0.869068	0.998545	1.09381	0.422842
FBtr0071902	FBgn0034793	asrij	20.341	19.0456	20.0888	16.9512	20.4181	19.8409	16.9012	20.7098	15.8708	18.2512	15.1781	12.6435	0.362599
FBtr0071903	FBgn0034795	MED23	15.512	17.2128	16.5054	18.8748	16.7788	19.4958	17.8006	15.9307	17.0899	17.5812	24.1596	21.0906	0.180623
FBtr0071904	FBgn0034796	CG3700	17.4238	21.0101	18.0939	21.7912	18.3372	23.7995	23.6907	21.2729	21.4059	18.0021	26.6453	22.6515	0.456911
FBtr0071905	FBgn0034794	Gmer	72.2063	69.9013	64.1999	63.8816	69.1908	68.184	69.1716	68.9182	69.7031	75.003	55.5505	64.4909	0.539035
FBtr0071906	FBgn0034792	CG3499	64.5895	62.6402	62.2799	62.8712	60.1633	68.3779	60.0372	55.2154	54.4713	51.6701	61.8437	62.1467	0.420992
FBtr0071907	FBgn0034791	CG3501	144.643	135.977	146.502	134.556	134.699	145.503	143.323	142.611	134.408	140.87	138.388	142.484	0.429625
FBtr0071909	FBgn0001263	inaD	0.0663717	0	0.0233068	0.0472195	0.0726231	0.0493591	0.0445521	0.103666	0.0848888	0.131446	0.116259	0.139841	NA
FBtr0071910	FBgn0034786	CG13531	8.36763	2.99582	8.06535	12.1458	4.68595	11.8241	12.2508	0.94724	0.585725	9.23594	3.01505	10.34	0.778146
FBtr0071911	FBgn0000405	CycB	2384.76	2509.64	2440.87	2505.61	2547.67	2655.47	2279.37	2263.48	2256.11	2110.02	2650.85	2529.69	0.401481
FBtr0071913	FBgn0000405	CycB	50.5223	51.1583	45.2275	45.1738	44.5961	48.1683	55.543	42.3611	41.1949	45.2218	51.3006	55.1032	0.544212
FBtr0071914	FBgn0000405	CycB	21.0814	28.7524	17.7395	20.7258	25.9286	30.6296	17.4714	17.2953	13.6826	22.0149	24.1643	24.5197	0.852272
FBtr0071919	FBgn0028371	jbug	0	0	0	0.0374408	0	0	0	0	0	0	0	0	NA
FBtr0071920	FBgn0034769	Obp58c	0	0	0	0	0	0	0	0	0	0	0	0	NA
FBtr0071921	FBgn0050259	CG30259	0	0	0	0	0	0	0	0	0	0	0	0	NA
FBtr0071922	FBgn0005631	robo	0.0837266	0.0835674	0.0640867	0.081078	0.0664611	0.195211	0.130263	0.128385	0	0.0602519	0.191582	0.240262	0.557971
FBtr0071924	FBgn0020257	Ppa	0.0286661	0.0393302	0	0	0.023493	0.0559489	0.0216454	0.00671579	0	0.0212809	0.0376166	0.0301791	NA
FBtr0071927	FBgn0050196	CG30196	0	0.296802	0	0	0	0	0	0	0	0	0	0	NA
FBtr0071928	FBgn0034756	Cyp6d2	0	0	0	0	0	0	0	0	0	0	0	0	NA
FBtr0071929	FBgn0034755	CG3746	0	0	0	0	0.124939	0	0	0	0	0	0.119691	0.119319	NA
FBtr0071931	FBgn0050195	CG30195	0	0	0	0	0.123157	0	0	0	0	0	0	0	NA
FBtr0071933	FBgn0034753	CG2852	1531.65	1559.33	1571.8	1556.52	1570.28	1623.71	1522.51	1536.03	1551.42	1434.21	1593.32	1526.19	0.387108
FBtr0071934	FBgn0040091	Ugt58Fa	0.0297905	0.2941	0.188395	0.190933	0.0979188	0.166194	0.479971	0.33503	0.257304	0.2656	0.219412	0.282634	0.615182
FBtr0071935	FBgn0261596	RpS24	2695.59	2689.39	2728.57	2356.74	2500.04	2425.33	2650.12	2706.39	2548.8	2575.48	2256.24	2328.78	0.148632
FBtr0071936	FBgn0034750	CG3732	100.976	98.7934	99.1024	98.784	102.13	99.9581	103.669	100.949	96.0364	100.349	98.7634	97.9713	0.453951
FBtr0071937	FBgn0019949	Cdk9	54.232	48.1043	46.9676	52.0508	51.1675	57.3274	50.9418	57.2264	51.6517	53.9879	52.0662	61.2695	0.446627
FBtr0071938	FBgn0034748	CG17807	22.8366	22.5008	21.8106	19.759	20.5858	20.8536	20.8678	24.2085	18.448	20.5	16.0302	19.6708	0.237558
FBtr0071940	FBgn0034745	CG4329	0	0	0	0	0	0	0	0	0.0125394	0	0	0.013768	NA
FBtr0071942	FBgn0034797	nahoda	0.101581	0	0	0.0657906	0	0.0688628	0	0	0	0	0.069198	0.0928332	0.645106
FBtr0071943	FBgn0034797	nahoda	0.0143509	0.0530301	0.0203385	0	0.0738382	0	0.116712	0.126744	0.148168	0.0860441	0.197858	1.11e-10	NA
FBtr0071951	FBgn0034803	CG9849	1.44061	0.791072	0	0	0	0.803031	0	2.02484	1.38009	1.4249	1.50916	0	1
FBtr0071953	FBgn0003900	twi	0	0	0	0	0	0	0	0	0	0	0	0	NA
FBtr0071958	FBgn0021979	l(2)k09913	80.0138	80.2568	62.3405	96.7555	80.6219	87.8409	77.2352	55.7326	75.1679	44.9462	82.7317	78.7979	1
FBtr0071959	FBgn0021979	l(2)k09913	0	0	0	7.25e-06	0	0	0	1.34e-05	0	0	0	0	NA
FBtr0071960	FBgn0021979	l(2)k09913	3.76023	5.60455	2.54284	2.57242	3.07407	2.84464	3.78508	4.02679	2.83036	4.38338	4.5019	5.08362	0.794737
FBtr0071961	FBgn0021979	l(2)k09913	0.180439	0	0.537443	0.185368	0	0.402402	0.726196	0.642587	0.493247	0.187923	0.351183	0.708419	0.656415
FBtr0071962	FBgn0050202	tRNA:CR30202	0	0	0	0	0	0	0	0	0	0	0	0	NA
FBtr0071963	FBgn0034816	CG3085	24.315	27.2658	28.7119	26.7154	25.3803	29.7391	29.9776	31.9853	29.1157	30.2663	35.3143	41.2026	0.372204
FBtr0071964	FBgn0045483	Gr59a	0	0	0	0	0	0	0	0	0	0	0	0	NA
FBtr0071965	FBgn0045482	Gr59b	0	0	0	0	0	0	0	0	0	0	0	0	NA
FBtr0071966	FBgn0034820	CG13538	0	0	0	0	0	0	0	0	0	0	0	0	NA
FBtr0071967	FBgn0050192	CG30192	0	0	0	0	0	0	0	0	0	0	0	0	NA
FBtr0071968	FBgn0034827	Klp59D	0	0	0	0	0	0	0	0	0	0	0	0	NA
FBtr0071969	FBgn0034829	CG9899	0	0	0	0	0	0	0	0	0.0481257	0	0	0	NA
FBtr0071973	FBgn0034826	CG13544	0	0	0	0	0	0	0	0	0	0	0	0	NA
FBtr0071974	FBgn0034825	CG3215	0	0	0	0	0	0	0	0	0	0	0	0	NA
FBtr0071975	FBgn0034824	Klp59C	0	0	0	0	0	0	0	0	0	0	0	0	NA
FBtr0071976	FBgn0041236	Gr59d	0	0	0	0	0	0	0	0	0	0	0	0	NA
FBtr0071977	FBgn0041235	Gr59c	0	0	0	0	0	0	0	0	0	0	0	0	NA
FBtr0071978	FBgn0034822	RpL37b	0	0.374531	0.36514	0	0	0	0	0	0	0.342639	0	0	NA
FBtr0071979	FBgn0034821	CG9876	0	0	0	0	0	0	0	0	0	0	0	0	NA
FBtr0071980	FBgn0034819	CG9877	0	0	0	0	0	0	0	0	0	0	0	0	NA
FBtr0071982	FBgn0003062	Fib	148.972	143.144	151.137	151.886	144.375	153.042	153.666	147.037	138.381	122.284	149.723	164.673	0.518518
FBtr0071983	FBgn0050201	tRNA:CR30201	0	0	0	0	0	0	0	0	0	0	0	0	NA
FBtr0071984	FBgn0034814	CG9890	42.3725	40.7529	38.8798	38.9548	41.8325	43.8124	40.5211	44.7313	42.3814	40.3037	36.8506	41.5997	0.473976
FBtr0071985	FBgn0010622	l(2)06496	2.89017	5.46161	6.19518	6.46902	5.14651	4.38147	4.23532	5.46449	6.28908	6.90262	4.92373	7.46316	0.573801
FBtr0071988	FBgn0034808	CG9896	84.4628	85.0223	80.5718	73.259	71.4752	73.3965	81.1603	87.1176	80.794	83.0545	75.2622	76.5885	0.244953
FBtr0071989	FBgn0034807	CG9897	0	0	0	0	0	0	0	0	0	0	0	0	NA
FBtr0071990	FBgn0052833	CG32833	0	0	0	0	0	0	0	0	0	0	0	0.0548236	NA
FBtr0071993	FBgn0034804	CG3831	65.6843	75.7892	70.771	78.7065	81.3645	76.2623	78.1484	73.3938	80.6074	80.2035	82.3095	81.1048	0.320393
FBtr0071994	FBgn0034802	CG3800	538.238	530.71	514.398	543.397	507.884	515.735	548.301	530.472	582.891	552.178	552.508	566.027	0.435276
FBtr0071995	FBgn0034800	CG3788	7.70955	2.7792	2.85012	3.53958	1.67711	4.7507	4.39636	5.65664	4.82698	5.22082	5.78544	4.97681	0.837442
FBtr0071996	FBgn0010660	Nup214	87.8717	95.986	95.2015	104.398	95.5236	107.931	97.1525	91.1445	99.6676	92.3775	122.399	111.901	0.296072
FBtr0071998	FBgn0034833	CG13539	0	0	0	0	0	0	0	0	0	0	0	0	NA
FBtr0071999	FBgn0034835	CG3092	0	0	0	0	0	0	0	0	0	0	0	0	NA
FBtr0072001	FBgn0034841	CG13541	0	0.0620269	0	0	0	0	0	0	0	0	0	0	NA
FBtr0072002	FBgn0034844	CG9861	0	0.0579316	0	0	0	0	0.106294	0	0.050622	0	0	0	NA
FBtr0072004	FBgn0050409	CG30409	0	0	0	0	0	0	0	0	0	0	0.335266	0	NA
FBtr0072006	FBgn0034850	CG9875	0	0	0	0	0	0	0	0	0	0	0	0	NA
FBtr0072010	FBgn0034853	Ice1	76.0392	80.9891	83.761	81.9946	75.1293	83.2154	80.9554	81.0564	85.8031	77.0952	93.2004	91.8801	0.484404
FBtr0072011	FBgn0041712	yellow-d	0.236988	0.487421	0.0936683	0	0.194734	0.0661043	0.536938	0.138813	0.170572	0.234763	0.187008	0.281045	0.660083
FBtr0072012	FBgn0034856	yellow-d2	0.159155	0.479901	0.25179	0.127669	0	0.222031	0.200355	0.745828	0.0764138	0.039436	0.209629	0.839576	0.637604
FBtr0072013	FBgn0034858	eIF2B-delta	3.44029	3.75638	6.43929	9.66426	11.2455	13.6239	3.22902	4.55142	12.2345	3.15831	13.7876	9.0982	0.446627
FBtr0072014	FBgn0034858	eIF2B-delta	0	0	0	0.979627	0.572031	0.599817	0.58793	1.03713	0	0	1.06822	0.587658	0.243504
FBtr0072015	FBgn0034858	eIF2B-delta	79.015	78.4127	68.0904	84.632	92.5664	88.9539	85.0923	85.1833	80.7576	91.3822	75.4807	99.5598	0.382368
FBtr0072016	FBgn0050411	CG30411	0	0	0	0	0	0	0	0	0	0	0	0	NA
FBtr0072019	FBgn0034867	CG13557	0	0	0	0	0	0	0	0	0	0	0	0	NA
FBtr0072020	FBgn0034866	Or59c	0	0	0	0	0	0	0	0	0	0	0	0	NA
FBtr0072021	FBgn0034865	Or59b	0	0	0	0	0	0	0	0	0	0	0	0	NA
FBtr0072022	FBgn0034863	SkpF	0	0	0	0	0	0	0	0	0	0	0	0	NA
FBtr0072023	FBgn0026384	Or59a	0	0	0	0	0	0	0	0	0	0	0	0	NA
FBtr0072024	FBgn0034861	CG9815	0	0.0673039	0	0	0	0	0	0	0.118138	0	0	0	NA
FBtr0072025	FBgn0034860	CG9812	0	0	0	0	0	0	0	0	0	0	0	0	NA
FBtr0072027	FBgn0034859	CG3520	13.7532	14.6623	14.7136	14.8037	14.7396	16.4964	14.5559	14.4063	14.5368	12.9999	15.4332	15.7395	0.486521
FBtr0072028	FBgn0028497	CG3530	37.0746	38.6242	37.9058	39.2603	37.8221	40.0306	37.5557	37.6489	38.3316	32.6056	41.4173	41.1404	0.49975
FBtr0072029	FBgn0028497	CG3530	0.172719	0.303202	0.588039	0.390324	0.511583	0.103777	0.179027	0.593797	0.0835223	0.0899628	0.0934078	0	0.443904
FBtr0072030	FBgn0250838	CG30415	376.982	386.001	372.281	371.159	397.139	388.692	396.886	397.998	388.892	415.775	381.727	399.488	0.50061
FBtr0072031	FBgn0250838	CG30415	5.8091	5.05959	7.58025	7.76804	8.90316	7.55823	7.24993	4.49821	7.3745	7.84656	8.22187	8.33989	0.449948
FBtr0072033	FBgn0040660	CG13551	596.91	565.163	586.295	579.463	588.631	581.17	560.938	485.68	544.326	570.205	584.431	576.984	0.420992
FBtr0072034	FBgn0040660	CG13551	30.3038	31.6102	37.1175	37.8531	44.5869	37.115	34.4669	33.6217	28.2001	32.582	38.2054	50.1987	0.469093
FBtr0072036	FBgn0034854	Golgin245	55.3115	53.1753	50.6001	56.4136	52.7174	59.4684	55.4218	54.6642	56.5158	55.6884	67.8526	62.4733	0.308735
FBtr0072037	FBgn0003977	vir	21.1293	21.1754	16.8893	26.1241	22.5055	27.642	20.8057	16.1037	18.2554	15.7798	32.5806	29.057	0.458289
FBtr0072038	FBgn0034849	CG3500	0	0	0	0.290753	0	0	0	0	0	0	0	0	NA
FBtr0072040	FBgn0050413	CG30413	0	0	0	0	0	0	0	0	0	0	0	0	NA
FBtr0072041	FBgn0050417	CG30417	0	0	0	0	0	0	0	0	0	0	0	0	NA
FBtr0072043	FBgn0050412	CG30412	0	0	0	0	0	0	0	0	0	0	0	0	NA
FBtr0072044	FBgn0050412	CG30412	0	0	0	0	0	0	0	0	0	0	0	0	NA
FBtr0072045	FBgn0034842	Prosbeta5R1	0	0	0	0	0	0	0	0	0	0	0	0	NA
FBtr0072046	FBgn0034840	CG3124	0	0	0	0	0	0	0	0	0	0	0	0	NA
FBtr0072047	FBgn0003009	ord	0	0	0.0287905	0	0	0	0	0	0	0	0	0	NA
FBtr0072048	FBgn0034838	CG12782	0	0	0	0	0	0	0	0	0	0.043931	0	0	NA
FBtr0072049	FBgn0034837	RpL22-like	0	0.0479991	0	0	0	0	0	0.0820716	0	0	0	0.0462084	NA
FBtr0072050	FBgn0040063	yip3	0	0	0	0	0	0	0	0	0	0	0	0	NA
FBtr0072051	FBgn0040063	yip3	0	0	0	0	0	0	0	0	0	0	0	0	NA
FBtr0072052	FBgn0034834	LS2	0	0	0	0	0	0	0	0	0	0	0	0	NA
FBtr0072056	FBgn0034869	CG13558	0	0	0	0	0	0	0	0	0	0	0	0	NA
FBtr0072057	FBgn0034870	CG13559	0	0	0	0	0	0	0	0	0	0	0	0	NA
FBtr0072058	FBgn0261786	mi	117.14	120.314	124.533	125.546	115.122	121.566	112.058	110.506	118.392	110.661	135.464	122.847	0.465396
FBtr0072059	FBgn0041234	Gr59f	0	0	0	0	0.145747	0	0.133641	0	0	0	0	0	NA
FBtr0072060	FBgn0050185	CG30185	124.141	111.226	121.273	102.595	116.01	110.015	112.141	117.577	115.588	120.749	96.9073	105.782	0.352914
FBtr0072061	FBgn0034877	levy	109.706	125.299	113.009	126.471	129.758	127.859	108.571	122.292	128.777	125.091	126.74	133.044	0.460292
FBtr0072062	FBgn0010501	Dcp-1	95.7897	84.9028	80.2178	68.9034	84.5817	80.6638	86.1866	94.9422	87.5779	80.4115	72.5249	74.1287	0.239998
FBtr0072063	FBgn0034880	ItgalphaPS5	0.108723	0	0.0163552	0.0331223	0	0.17323	0	0.0582202	0.014893	0.0461245	0.0326159	0.0817664	NA
FBtr0072064	FBgn0015277	Pi3K59F	22.4955	22.6323	18.3635	21.6857	21.7291	23.2098	22.0775	23.1328	21.7972	20.5218	21.0731	24.714	0.569953
FBtr0072065	FBgn0050184	CG30184	2.01133	2.12385	2.7332	2.00573	2.53665	2.8886	2.7498	2.2221	2.07324	2.92391	3.49829	4.33157	0.526517
FBtr0072066	FBgn0015903	apt	158.185	168.696	165.583	163.243	153.051	154.452	158.958	158.306	142.978	150.519	174.322	160.24	0.390076
FBtr0072067	FBgn0015903	apt	1.46444	1.12201	1.43028	0.365278	2.08507	1.03196	0.812956	2.55433	0.874067	3.37224	1.12773	0.396145	0.83362
FBtr0072068	FBgn0015903	apt	0.149717	0	0.456265	0.161973	0.165434	0.165255	0.151152	0.139305	0.139051	0	0.611409	0	1
FBtr0072069	FBgn0015903	apt	0.148268	0	0.5982	0	0.154725	0	0	0.150992	0	0.269113	0	0	NA
FBtr0072070	FBgn0015903	apt	1.07275	1.23126	2.03467	0.900136	0	0.543466	0.49538	0.269197	0	0	0	1.17189	0.316027
FBtr0072071	FBgn0034882	CG5398	0	0	0	0	0	0	0	0	0	0	0	0	NA
FBtr0072072	FBgn0004795	retn	140.014	152.451	162.308	160.723	142.431	153.657	125.316	152.013	144.03	140.527	206.804	182.072	0.610481
FBtr0072073	FBgn0004795	retn	49.5774	49.6337	41.5707	53.0647	45.6492	44.2783	52.9765	41.9593	50.3183	37.22	52.5124	53.1865	0.73063
FBtr0072083	FBgn0016762	angel	15.2207	14.859	12.772	11.8286	13.3447	11.6034	12.3696	13.2379	9.68991	13.9149	8.37079	11.8513	0.338913
FBtr0072084	FBgn0034893	mRpL43	55.99	50.2699	47.824	44.1907	52.7503	48.4527	56.104	58.434	48.3437	64.7114	40.8782	48.4237	0.766107
FBtr0072085	FBgn0013548	l(2)dtl	206.977	218.105	207.871	226.252	212.785	217.561	190.673	188.01	196.449	171.688	251.396	226.255	1
FBtr0072087	FBgn0034897	Sesn	52.205	51.542	51.0379	52.2581	47.4328	49.3082	49.3829	49.9019	46.5983	35.7965	61.4486	49.2466	0.540509
FBtr0072088	FBgn0034899	CG13560	0	0	0	0	0	0	0	0	0	0	0	0	NA
FBtr0072089	FBgn0034900	CG12491	0	0	0	0	7.57e-09	0	1.53e-09	0	0	0	0	0	NA
FBtr0072090	FBgn0034901	CG11300	0	0	0.115809	0.235882	0.485702	0	0.110162	0	0	0.10871	0	0	NA
FBtr0072091	FBgn0034902	CG5532	101.384	115.742	103.778	96.9576	106.759	111.438	93.675	99.3345	94.7342	97.1907	98.1231	99.6707	0.385418
FBtr0072094	FBgn0034898	CG18128	0	0	0	0	0	0.160359	0	0	0	0.0474797	0	0	NA
FBtr0072095	FBgn0011297	l(2)not	40.4303	46.2374	41.5707	41.0622	37.895	45.4001	42.2612	44.9229	43.3755	38.0321	42.9382	43.5008	0.438702
FBtr0072096	FBgn0034894	CG4091	84.556	83.9944	87.5895	86.2399	85.4442	86.6942	85.825	83.6955	79.465	78.9868	92.952	82.6988	0.455398
FBtr0072097	FBgn0034894	CG4091	0.678177	0	0	0	0	0.218447	0.177784	0.31019	0.175267	0	0	0.351051	NA
FBtr0072098	FBgn0034894	CG4091	0.29699	0	0	0	0	0.185173	0	0.533996	0	0	0.177659	0	NA
FBtr0072099	FBgn0050183	CG30183	57.4555	60.2315	60.1626	51.3912	51.4351	60.0341	59.5374	61.3262	56.1227	47.1255	57.485	59.4907	0.251205
FBtr0072100	FBgn0011296	l(2)efl	0	0	0	0	0	0	0	0	0	0	0	0	NA
FBtr0072102	FBgn0034885	CG4019	0	0	0	0	0	0	0	0	0	0	0	0	NA
FBtr0072103	FBgn0034885	CG4019	0	0	0	0	0	0	0	0	0	0	0	0	NA
FBtr0072104	FBgn0034885	CG4019	0	0	0	0	0	0	0	0	0	0	0	0	NA
FBtr0072105	FBgn0034885	CG4019	0	0	0	0	0	0	0	0	0	0	0	0	NA
FBtr0072107	FBgn0034883	CG17664	0	0	0	0	0	0	0	0	0	0	0	0	NA
FBtr0072109	FBgn0260455	CG10332	0	0	0	0	0	0	0	0	0	0	0	0	NA
FBtr0072111	FBgn0034879	Rrp4	14.0459	14.8326	20.4583	16.0972	15.8994	13.25	14.1388	11.6428	10.8682	14.4271	9.6209	15.9056	0.483405
FBtr0072112	FBgn0034878	pita	125.7	121.313	124.318	141.741	138.439	138.044	126.792	119.706	128.793	133.064	148.965	141.967	0.254052
FBtr0072113	FBgn0034878	pita	0.315742	0.368873	0	0.166702	0.16392	0.358138	0.311083	0.321682	0.151176	0.938564	0.691419	0.719858	0.431621
FBtr0072114	FBgn0034876	wmd	153.027	143.499	145.185	135.717	142.861	150.149	142.117	149.657	145.867	138.137	151.546	145.625	0.405026
FBtr0072115	FBgn0041233	Gr59e	0.225563	0	0	0	0	0.050355	0	0.0422822	0	0.134175	0	0.142851	NA
FBtr0072116	FBgn0050181	ppk3	0	0	0.0342836	0.0347513	0.0356484	0	0.0327491	0.0304789	0	0	0.0342316	0	NA
FBtr0072117	FBgn0000241	bw	0	0	0	0	0	0	0	0	0	0	0	0	NA
FBtr0072120	FBgn0015372	RabX1	52.5159	51.7336	56.6265	52.8976	52.8038	51.4626	51.7037	57.1089	47.7302	48.5473	57.4027	55.3017	0.452932
FBtr0072121	FBgn0034871	CG3906	0	0	0	0	0	0	0	0	0	0	0	0	NA
FBtr0072122	FBgn0050177	CG30177	0	0	0	0	0	0	0	0.0322205	0	0	0	0.036255	NA
FBtr0072123	FBgn0034907	CG5539	0	0.0559155	0	0	0	0.113914	0.102775	0.0956393	0	0	0	0	NA
FBtr0072124	FBgn0034908	CG5543	50.1374	46.812	45.5467	45.7402	45.8698	47.017	46.0685	48.9524	50.5856	48.5308	50.3508	48.7766	0.465396
FBtr0072126	FBgn0034914	CG5554	156.526	172.067	159.628	170.527	161.917	169.349	159.748	160.293	155.956	145.727	193.183	178.68	0.553203
FBtr0072127	FBgn0024234	gbb	0	0	0	0.0989522	0.169165	0	0	0	0.444464	0	0	0	NA
FBtr0072128	FBgn0034919	CG5569	105.256	97.0851	98.3069	90.7998	102.016	96.2575	99.2473	105.625	101.14	112.187	88.4764	94.9591	0.584786
FBtr0072129	FBgn0011236	ken	63.9491	70.7566	77.4445	55.9695	61.8505	66.1928	71.8492	73.7172	65.4377	54.1948	53.6804	58.6038	0.0685562
FBtr0072130	FBgn0020372	TM4SF	0	0.19871	0.191066	0.0774865	0.357751	0.68751	0.145982	0.237753	0.17396	0.323209	0.268609	0.382233	0.455398
FBtr0072131	FBgn0034920	CG5597	0.0614362	0.0673041	0	0	0.0676816	0	0.0618881	0.115174	0	0	0	0.129873	NA
FBtr0072132	FBgn0262619	DNA-ligI	128.626	130.058	132.486	127.864	128.106	128.704	128.942	126.565	135.152	140.917	126.798	129.493	0.488971
FBtr0072133	FBgn0034924	CG17658	30.6061	27.1198	30.5731	24.4615	27.7375	26.9061	33.8921	35.6928	29.6318	27.1831	25.308	28.8443	0.342415
FBtr0072134	FBgn0263667	Lpt	35.9557	36.3805	33.2564	38.0322	31.9698	40.2933	30.4301	35.3888	36.3506	29.7776	40.1413	41.1744	1
FBtr0072135	FBgn0034928	CG13562	0.238262	0.17864	0.722141	0.261895	0.434535	1.35324	0.693633	0.620486	0.383632	0.16134	0	0.979427	0.742315
FBtr0072136	FBgn0261794	kcc	2.9546	6.90386	2.36008	1.59326	0.000335062	1.70373	1.89862	0.698802	2.41227	4.20144	1.95365	0.395633	0.55316
FBtr0072137	FBgn0261794	kcc	16.2466	11.1334	15.1611	19.4513	15.5064	16.4307	15.9819	16.8764	14.4203	11.0186	22.7836	18.1456	0.589413
FBtr0072138	FBgn0261794	kcc	0	0.0820401	0	0	0	0	0	0	0	0	0	0.0800611	NA
FBtr0072139	FBgn0261794	kcc	0	0.163869	0.181006	0	0.183694	0.179408	0	0.456807	0	0	0	0	NA
FBtr0072140	FBgn0034931	CG2812	0.683907	1.53934	3.17912	0.534284	1.34502	1.26498	2.1526	1.29629	2.10553	0.788529	0.869653	1.23396	0.492478
FBtr0072141	FBgn0023477	Tal	332.257	287.02	373.198	325.602	334.638	311.589	328.331	340.685	364.576	369.182	294.201	312.879	0.753949
FBtr0072142	FBgn0001123	Galphas	2.19863	4.12993	3.55709	2.41194	2.48817	2.94363	3.10947	2.47649	3.68362	0.284059	2.22827	1.45691	0.392492
FBtr0072143	FBgn0001123	Galphas	0	0.280994	0.229489	0	0	0.225689	0.184498	0.300575	0.142377	0.199925	0.088298	0.164822	0.764162
FBtr0072144	FBgn0001123	Galphas	0	0.491607	0.295954	0	0	0.190267	0.270944	0.242786	0.423786	0.0299199	0.265686	0.251395	0.74911
FBtr0072145	FBgn0034936	CG2970	0	0	0	0	0	0	0	0	0	0	0	0	NA
FBtr0072146	FBgn0034937	fzr2	0	0.0399854	0	0	0	0.0813803	0	0.0683463	0	0	0.0768041	0.0384585	NA
FBtr0072147	FBgn0034939	thoc5	55.75	53.9575	51.0252	51.7394	54.6955	55.5966	54.184	57.8369	55.0088	56.236	51.3937	56.4122	0.491786
FBtr0072148	FBgn0029105	alpha-catenin-related	0	0	0	0	0	0	0	0	0	0	0	0.00874907	NA
FBtr0072150	FBgn0034943	Fmo-1	0.109053	0.23918	0.421634	0.0777246	0.119618	0.243393	0.366071	0.374755	0.383885	0.288178	0.229704	0.191703	0.653622
FBtr0072151	FBgn0020764	Alas	53.096	54.2483	50.5797	53.2316	56.5904	57.3311	56.3443	67.2578	46.4305	48.2337	43.4662	56.2289	0.622684
FBtr0072152	FBgn0003008	or	54.9989	48.6151	49.5869	47.0612	49.8274	49.3496	49.2527	48.8558	51.083	53.2029	48.1767	52.5289	0.473976
FBtr0072153	FBgn0034946	CG3065	6.13442	8.34889	7.026	6.26233	8.57937	9.21079	7.44796	11.7137	11.5236	6.64311	6.63423	9.06032	0.673373
FBtr0072154	FBgn0034946	CG3065	78.6777	77.8318	77.1587	70.0531	67.0964	75.3866	81.1895	81.326	72.5076	68.5999	74.2668	75.638	0.26708
FBtr0072155	FBgn0034946	CG3065	12.9763	12.2491	16.2024	13.6966	13.3492	12.329	13.8882	10.4947	13.4189	17.6384	16.1855	14.735	0.602577
FBtr0072156	FBgn0002791	mr	51.037	57.3491	53.6743	53.0376	53.0366	56.4667	56.3543	56.3547	59.096	51.1965	56.15	55.73	0.454104
FBtr0072157	FBgn0005612	Sox14	0	0	0	0	0	0.0338277	0	0	0	0	0	0	NA
FBtr0072158	FBgn0005612	Sox14	0.0609798	0.0223052	0	0	0	0	0	0	0	0	0	0	NA
FBtr0072159	FBgn0050178	CG30178	0.260345	0.0949728	0	0	0	0.0969647	0	0.162711	0.0835634	0.172445	0.0920789	0	NA
FBtr0072160	FBgn0034950	Pask	0	0	0	0	0.051313	0.0698166	0	0.0733263	0.0150059	0	0.0985903	0.0494318	NA
FBtr0072161	FBgn0034957	CG3121	0	0	0	0	0	0.0248066	0	0	0	0	0	0	NA
FBtr0072162	FBgn0034959	CG11388	2.3566	4.47098	3.52487	2.85825	2.47819	3.51787	3.97653	4.83503	2.20072	3.21817	2.48029	3.65982	0.601645
FBtr0072163	FBgn0022708	Adk2	313.645	301.159	304.209	286.487	311.904	289.181	307.417	302.398	299.456	326.659	269.194	296.462	0.500974
FBtr0072164	FBgn0011695	PebIII	0.674453	0	0	1.39898	0.195273	0	0.87127	0.709416	0.520884	0.349111	0.720794	0.57339	NA
FBtr0072165	FBgn0034961	CG3163	44.4596	42.1599	40.34	41.1971	42.2341	43.943	40.7899	45.0133	42.4925	38.0364	43.2958	42.1466	0.444425
FBtr0072166	FBgn0034962	MAN1	135.311	139.45	156.219	126.484	126.929	138.652	141.501	137.943	140.513	139.409	144.789	141.934	0.41944
FBtr0072167	FBgn0034962	MAN1	22.456	23.1171	15.6223	22.6348	19.8524	21.0503	20.4613	20.2182	24.1732	17.5859	16.8884	22.7377	0.666183
FBtr0072168	FBgn0034964	IntS1	50.1713	49.3924	46.7319	54.1631	54.3366	58.3858	55.0601	51.1449	42.7093	55.6603	52.1788	63.7296	0.220313
FBtr0072169	FBgn0003353	sei	4.90281	1.80664	0.102162	1.37333	2.43805	0.0954025	5.54737	1.91706	4.50896	0.00178941	4.14651	4.42731	1
FBtr0072170	FBgn0003353	sei	7.99e-08	5.74e-08	3.7809	3.5e-08	1.45e-09	1.37049	7.84e-08	1.6e-08	4e-10	1.0062	4.18e-08	1.05705	NA
FBtr0072172	FBgn0034967	eIF-5A	57.5945	55.1657	50.6258	50.524	45.1291	53.5356	50.1052	53.6721	49.5913	55.4175	46.4755	54.7466	0.465396
FBtr0072173	FBgn0034967	eIF-5A	1877.09	1827.64	1972.77	1886.9	2027.74	1952.02	1859.8	1933.06	1946.9	2033.2	1803.66	1821.29	0.51503
FBtr0072174	FBgn0034968	RpL12	3.61602	3.50408	2.23755	5.43381	4.17455	3.55755	3.1051	2.9897	4.17881	2.20933	2.33997	3.80229	0.721822
FBtr0072175	FBgn0034968	RpL12	1906.38	1889.37	1925.71	1588.9	1723.84	1741.37	1858.19	1932.28	1836.69	1818.96	1471.72	1515.91	0.156076
FBtr0072176	FBgn0034968	RpL12	502.442	501.944	513.206	441.266	510.311	489.879	475.302	475.437	428.873	462.157	441.997	459.001	0.352914
FBtr0072177	FBgn0025806	Rap2l	125.153	108.12	118.646	105.707	119.455	108.023	114.271	109.73	120.107	111.975	117.221	114.068	0.436105
FBtr0072179	FBgn0034971	CG3209	70.0713	67.7116	76.2358	70.037	74.1462	79.4297	79.129	72.4563	74.9076	81.0617	69.7317	74.332	0.629376
FBtr0072185	FBgn0023170	RpL39	3906.59	4009.51	3893.39	3180.68	3252.76	3324.12	3827.54	3766.69	3295.11	3598.74	2752.06	2810.39	0.0997251
FBtr0072187	FBgn0028552	gammaSnap1	37.0195	35.7897	36.9739	36.1374	39.0361	33.4345	38.9593	37.4063	33.6796	42.5741	30.9202	38.3263	0.726395
FBtr0072188	FBgn0011726	tsr	1522.82	1488.96	1631.03	1533.78	1579.64	1555.39	1469.21	1611.25	1512.06	1520.31	1459.92	1475.7	0.408421
FBtr0072189	FBgn0034963	Not11	46.9906	44.7519	42.2618	43.0691	51.7155	48.7545	55.3168	50.6202	40.0508	61.2197	32.6455	46.2047	1
FBtr0072190	FBgn0034963	Not11	0.415819	0.382268	0.358334	0.385101	0.347384	0	1.0891	0.64016	0	1.60818	0.620965	1.02465	0.734869
FBtr0072191	FBgn0013764	Chi	124.186	123.058	117.127	112.777	120.368	125.905	121.555	126.571	111.239	113.709	123.721	122.98	0.422278
FBtr0072192	FBgn0013764	Chi	3.57707	3.80719	2.20449	2.23438	3.72285	3.20601	4.77336	3.7425	3.08592	1.13689	3.84928	3.02281	0.75908
FBtr0072193	FBgn0050172	CG30172	1.3485	0	0.398808	0.837589	0.103913	0.232278	2.42e-05	0.480264	1.34738	0.290464	1.27275	0	NA
FBtr0072194	FBgn0061198	HSPC300	114.92	98.2768	98.4642	99.176	96.6002	115.013	119.637	109.544	108.395	125.089	87.9001	90.962	0.640021
FBtr0072195	FBgn0034958	CG3907	0	2.28028	0.707676	0	1.92535	3.59405	1.72673	0	1.04283	1.08153	1.61511	0	1
FBtr0072196	FBgn0034958	CG3907	10.8239	10.2074	10.7162	8.55813	9.82105	7.5763	8.23764	12.2073	8.02845	8.58499	8.41596	10.4438	0.427732
FBtr0072197	FBgn0034956	CG4324	2.09e-05	0	0	0	0	0	0	0	0	0	0	0	NA
FBtr0072201	FBgn0034951	CG3860	63.9569	80.0479	76.9645	68.9381	73.6021	77.0366	74.1377	82.4971	69.9359	63.729	64.3634	73.5162	0.441572
FBtr0072202	FBgn0019948	Phm	50.7263	54.5323	56.6482	40.5822	46.4562	48.7771	56.2655	59.6945	53.3996	47.5808	42.0838	43.5112	0.117901
FBtr0072203	FBgn0019948	Phm	6.08745	7.00388	4.26907	10.4884	8.84733	9.37196	8.17024	7.06225	5.27634	8.0281	10.6285	10.3636	0.16692
FBtr0072204	FBgn0034948	Gadd34	119.177	124.207	118.106	119.299	126.619	121.574	112.818	112.675	108.101	109.442	122.241	124.28	0.44533
FBtr0072205	FBgn0034945	CG10904	42.8808	45.1548	37.0686	31.5734	37.9934	43.0381	45.9873	42.8351	40.4123	44.0531	27.9601	32.0878	0.418574
FBtr0072207	FBgn0034940	CG16787	42.4607	39.8872	44.1662	44.2401	46.2435	46.2553	45.0459	48.6635	46.6786	48.2272	39.6632	41.8558	0.582155
FBtr0072208	FBgn0034938	CG3803	33.1718	32.4422	31.9201	28.3664	34.7465	32.0882	33.8482	32.3587	32.4649	34.3776	28.3238	28.5275	0.46586
FBtr0072209	FBgn0034935	CG13565	0	0	0	0	0	0	0	0	0	0	0	0	NA
FBtr0072210	FBgn0034933	CG3735	56.3652	53.5343	57.3561	51.3006	48.6769	51.2523	57.67	60.8519	48.0028	52.1598	48.7923	55.2622	0.286709
FBtr0072211	FBgn0263006	Ca-P60A	0.608934	2.58458	0.713011	1.08144	0.356744	1.48796	0	0	2.2726	0.730552	1.09712	1.59475	0.905274
FBtr0072212	FBgn0263006	Ca-P60A	0	0	0	0.277355	0	0.285418	0	0.240926	0	0	0	0.250743	NA
FBtr0072213	FBgn0263006	Ca-P60A	0	0	0	0.201004	0	0	0	0	0	0	0	0	NA
FBtr0072214	FBgn0263006	Ca-P60A	20.6627	17.6508	25.8097	20.9299	12.7254	22.9386	14.9314	16.3443	22.3815	24.0936	35.8366	32.2435	0.644006
FBtr0072215	FBgn0263006	Ca-P60A	0.335759	0	0.365298	0	0	0	0	0	0	0	0	0	NA
FBtr0072216	FBgn0263006	Ca-P60A	28.2679	30.4376	30.9303	39.0044	32.8755	34.8896	25.9638	23.6507	29.451	25.8864	50.5038	45.3053	0.415884
FBtr0072217	FBgn0263006	Ca-P60A	179.756	191.61	190.756	213.173	189.16	216.341	181.03	174.911	174.033	151.734	264.733	241.186	0.615182
FBtr0072218	FBgn0263006	Ca-P60A	8.87473	11.9907	8.43678	11.4459	10.18	11.2815	7.17535	9.21395	8.75343	9.80991	15.3715	16.3716	0.348386
FBtr0072219	FBgn0015268	Nap1	1555.17	1557.83	1612.72	1336.07	1464.01	1381.49	1552.03	1534.97	1471.89	1640.76	1265.87	1379.46	0.331653
FBtr0072220	FBgn0034925	CG5339	99.2293	94.4305	95.4576	86.3509	87.478	89.0029	90.5615	96.7133	91.9626	94.0991	92.4621	91.3985	0.334602
FBtr0072221	FBgn0034923	Upf3	0	0	0	0	0.375508	0	0	0	0	0.681474	0	0	NA
FBtr0072223	FBgn0034921	DCP1	50.1812	55.474	59.7332	54.807	72.3322	53.5521	58.8208	50.5789	65.152	49.3075	57.9298	70.6441	1
FBtr0072224	FBgn0025334	PHDP	0.0597379	0	0	0	0	0	0	0	0.0574305	0	0	0	NA
FBtr0072225	FBgn0025336	CG4882	107.637	101.984	100.011	97.7259	108.055	104.837	110.656	111.495	108.191	111.447	91.5268	99.5606	0.638612
FBtr0072226	FBgn0025352	Thiolase	233	221.493	232.122	254.149	243.712	263.914	229.934	221.754	270.008	245.631	271.932	274.715	0.241509
FBtr0072227	FBgn0025335	CG4585	102.351	93.3115	118.176	117.614	106.064	106.719	108.525	98.1744	111.35	105.406	115.07	114.065	0.604289
FBtr0072232	FBgn0004581	bgcn	0.000472325	0.00136112	0.000722496	0.00102467	0.00291626	0	0.00137356	0	0.00027381	0.000492813	0	0.00178121	NA
FBtr0072233	FBgn0034918	Pym	159.468	147.031	166.579	156.133	146.834	155.918	173.966	164.436	157.16	153.517	162.934	159.604	0.455398
FBtr0072234	FBgn0021895	ytr	127.683	119.487	123.784	119.6	116.454	120.13	116.33	124.035	119.445	116.13	120.876	114.316	0.325679
FBtr0072235	FBgn0034915	eIF6	137.059	125.467	133.587	112.623	127.647	121.748	136.104	136.595	108.709	125.152	103.701	123.177	0.260306
FBtr0072236	FBgn0034913	Snap29	79.976	73.5429	75.2004	74.0867	80.255	74.3824	78.5263	78.2609	83.1591	84.5932	76.4297	73.6312	0.562243
FBtr0072237	FBgn0003401	shu	110.756	96.1173	104.409	101.851	104.135	96.9508	92.4771	98.3301	105.795	109.57	92.1795	95.9747	0.517996
FBtr0072238	FBgn0034910	CG4763	0	0	0	0	0	0	0	0	0	0	0	0	NA
FBtr0072239	FBgn0034909	CG4797	0	0.249281	0.0217279	0.257892	0.558674	0.566115	0.180056	0.743389	0.26386	0	0.172608	0.28725	0.563581
FBtr0072241	FBgn0028411	Nxt1	246.728	249.688	254.087	231.175	259.186	247.453	247.642	255.88	229.935	269.979	230.788	235.798	0.482429
FBtr0072242	FBgn0010278	Ssrp	214.904	220.025	212.938	206.936	219.47	208.696	258.853	257.064	266.053	199.104	217.353	192.611	0.345045
FBtr0072245	FBgn0034904	CG15800	0	0	0	0	0	0	0	0	0	0	0	0	NA
FBtr0072246	FBgn0034973	CG13564	0	0	0	0	0	0	0	0	0	0	0	0	NA
FBtr0072247	FBgn0034974	CG16786	0	0	0	0.0381814	0	0	0	0	0	0	0.0188047	0	NA
FBtr0072248	FBgn0034974	CG16786	0	0	0	3.2e-05	0	0	0	0	0	0	1.08e-05	0	NA
FBtr0072249	FBgn0086129	snama	86.3326	87.6041	87.6588	89.2151	84.4678	94.4435	89.1938	90.7031	89.0419	92.6884	98.1356	98.1017	0.408043
FBtr0072250	FBgn0034975	enok	68.7925	75.2439	67.159	67.8497	61.1397	74.0247	68.6604	68.8525	65.6425	59.0479	81.948	75.8225	0.832652
FBtr0072251	FBgn0041706	CG3253	0	0	0	0.0366389	0	0	0	0.0642551	0.0329066	0	0	0	NA
FBtr0072252	FBgn0034978	CG3257	0.0171947	0	0	0	0	0.0191784	0.0173119	0	0	0	0	0	NA
FBtr0072253	FBgn0021875	Zfrp8	16.9488	14.0909	13.9095	11.5463	14.6755	13.1145	12.9733	13.6062	15.7159	9.91615	15.1743	9.57305	0.367725
FBtr0072254	FBgn0019643	Dat	0	0	0	0	0	0	0	0	0	0	0	0	NA
FBtr0072255	FBgn0019643	Dat	0	0	0	0	0	0	0	0	0	0	0	0	NA
FBtr0072256	FBgn0015544	spag	98.8288	99.9021	100.873	88.5826	94.636	92.6656	100.942	101.351	98.6398	101.99	92.523	95.87	0.38101
FBtr0072257	FBgn0034985	CG3328	0.020245	0.0443877	0.0639145	0.076031	0.0661817	0.0451421	0.0203868	0.0569808	0.0582153	0.0200269	0.128333	0.085227	0.625977
FBtr0072258	FBgn0259937	Nop60B	948.317	872.806	1015.37	906.135	909.018	862.455	1032.34	1066.94	944.814	1020.8	846.207	981.975	0.619761
FBtr0072259	FBgn0026169	snoRNA:Psi18S-1820	0	0	0	0	0	0	0	0	0	0	0	1.36874	NA
FBtr0072260	FBgn0266083	ocm	25.4701	30.8603	27.5264	34.9096	29.566	35.9146	27.2323	32.078	25.4738	19.9692	43.9575	33.5101	0.71819
FBtr0072261	FBgn0034988	cN-IIIB	33.0146	33.4195	29.8819	33.1569	36.0876	36.9172	34.492	35.1271	34.1653	31.215	33.9644	36.12	0.475235
FBtr0072262	FBgn0034989	CG3356	71.6006	79.4172	76.8394	75.7975	74.6568	84.485	79.572	81.0117	73.6918	71.6684	77.0961	87.0974	0.509596
FBtr0072263	FBgn0050418	nord	0	0	0	0	0	0	0	0	0	0	0	0	NA
FBtr0072264	FBgn0034996	CG13575	0	0	0	0	0	0	0	0.0256671	0	0	0	0	NA
FBtr0072265	FBgn0034997	CG3376	1.67872	2.37896	2.78815	3.65333	3.766	2.23654	3.25619	3.0347	3.02434	3.13813	4.77275	5.57321	0.190117
FBtr0072266	FBgn0034997	CG3376	28.533	41.8883	34.1068	37.1509	35.9042	41.1329	40.0503	40.4463	30.3994	42.807	51.371	55.3258	0.239668
FBtr0072267	FBgn0005636	nvy	0	0	0	0	0	0	0	0	0	0	0	0	NA
FBtr0072268	FBgn0034999	CG3394	81.5889	87.3793	72.8121	76.2456	83.9393	70.9386	68.4053	70.512	60.936	77.5409	74.8053	79.7568	0.472733
FBtr0072269	FBgn0034999	CG3394	1.35195	0.702772	0	0	0.246611	0.244967	0.641213	0.554396	0.211906	0.428636	0.910593	0.435616	1
FBtr0072270	FBgn0003888	betaTub60D	2.58567	2.55146	0.834338	0.27893	0.70879	1.16759	1.23105	1.19216	1.884	0.810319	1.62011	2.31929	0.650172
FBtr0072271	FBgn0004101	bs	61.523	60.7627	65.31	63.1716	62.561	59.9582	58.2808	66.8593	60.5094	61.7544	64.6217	68.1782	0.473453
FBtr0072272	FBgn0005638	slbo	0	0	0	0	0	0	0	0	0	0	0	0	NA
FBtr0072274	FBgn0034994	Ir60a	0	0	0	0	0	0	0	0	0	0	0	0	NA
FBtr0072275	FBgn0050419	CG30419	0	0	0	0	0	0	0	0	0	0	0	0	NA
FBtr0072276	FBgn0034990	CG11406	0	0	0	0	0	0	0	0	0	0	0	0	NA
FBtr0072277	FBgn0034986	mRpS17	103.667	105.845	100.074	93.3692	93.398	83.2122	97.4314	107.955	97.3826	107.066	86.2854	90.7736	0.334436
FBtr0072280	FBgn0034982	CG4065	45.9691	40.9506	42.5461	46.6925	47.7808	46.8322	44.9132	46.4174	40.8144	43.5949	41.0239	44.546	0.619279
FBtr0072281	FBgn0041582	tamo	12.2092	14.652	15.8132	18.5733	18.1268	17.7452	13.4295	14.2619	10.8007	10.315	20.4721	19.4621	0.608941
FBtr0072282	FBgn0041582	tamo	0.286548	0	0	0.323385	0	0.165855	0	0	0	0	0	0	NA
FBtr0072285	FBgn0034976	CG4049	60.4046	64.2191	61.865	66.9253	58.4739	66.5839	60.3607	62.7161	61.4747	64.4599	79.0991	74.11	0.382378
FBtr0072287	FBgn0023081	gek	57.1135	57.5884	58.9578	57.8207	54.1462	63.401	60.0633	59.1404	60.7699	58.6236	65.2423	65.4075	0.453951
FBtr0072288	FBgn0034972	CG10339	0.0523335	0	0	0	0	0.0291926	0	0.0735677	0	0	0	0	NA
FBtr0072289	FBgn0035000	CG13578	0	0	0	0	0	0	0	0	0	0	0	0	NA
FBtr0072290	FBgn0002787	Rpn8	169.173	167.947	173.084	156.375	166.073	168.09	174.77	174.624	173.721	178.684	173.485	172.574	0.464708
FBtr0072293	FBgn0035005	CG3483	0	0	0	0	0	0	0	0	0	0	0	0	NA
FBtr0072294	FBgn0035007	CG3492	0	0	0	0	0	0	0	0	0	0	0	0	NA
FBtr0072295	FBgn0035008	CG3494	0	0	0	0	0	0	0	0	0	0	0	0	NA
FBtr0072296	FBgn0035008	CG3494	0	0	0	0	0	0	0	0	0	0	0	0	NA
FBtr0072297	FBgn0035009	CG16837	0	0	0	0	0	0	0	0	0	0	0	0	NA
FBtr0072298	FBgn0035010	CG13579	0	0	0	0	0	0	0	0	0	0	0	0	NA
FBtr0072299	FBgn0029501	Crtp	0	0	0	0	0	0	0	0	0	0	0	0	NA
FBtr0072300	FBgn0035014	CG13581	0	0	0	0	0	0	0	0.0645085	0	0.136621	0	0	NA
FBtr0072302	FBgn0050169	Brca2	63.8239	55.2679	55.1874	57.2026	61.6228	55.3347	58.961	60.6316	55.6024	65.392	48.63	57.2814	0.799168
FBtr0072303	FBgn0035020	CG13585	24.221	20.7808	25.0183	22.2266	24.853	22.2625	23.5027	21.3961	29.9514	22.5836	22.0175	23.3376	0.558982
FBtr0072304	FBgn0035020	CG13585	1.13285	0.353003	1.11971	0.498805	0.284835	1.08534	1.04055	1.60163	0.250237	0.775083	1.24015	1.67658	0.706797
FBtr0072305	FBgn0035022	CG11413	0.023247	0	0.0140664	0.112436	0	0	0.105082	0.195571	0	0.024594	0	0.110628	NA
FBtr0072307	FBgn0035024	CG11414	85.1423	99.0433	90.1429	84.2506	90.1968	93.3848	92.4863	95.3137	90.2786	80.0532	89.5348	86.9885	0.343724
FBtr0072308	FBgn0035025	uri	97.5895	96.0108	100.373	91.908	88.04	96.3538	92.637	96.6684	95.2222	90.837	92.689	95.1376	0.293678
FBtr0072309	FBgn0035027	CG3511	1.80532	0.330448	3.16514	5.76354	5.57558	3.22187	3.6345	1.4097	4.90021	1.78563	4.09766	4.4294	0.355906
FBtr0072312	FBgn0020521	pio	0	0	0	0	0	0	0	0	0	0	0	0	NA
FBtr0072313	FBgn0020521	pio	0	0	0	0	0	0	0	0	0	0	0	0	NA
FBtr0072314	FBgn0035031	CG13587	0.114719	0.0628482	0.242266	0.0614862	0.0631456	0	0.0577783	0.268821	0.0551361	0.113805	0.0605967	0	NA
FBtr0072315	FBgn0035033	CG3548	74.7585	70.8734	72.4988	78.6857	75.4584	82.3979	77.4914	76.8335	79.4854	75.69	92.1584	87.2467	0.282344
FBtr0072316	FBgn0035034	CG3565	0	0	0	0	0.139181	0	0	0	0	0	0	0	NA
FBtr0072317	FBgn0035035	CG3570	84.3716	85.5283	82.9371	72.2956	79.7616	71.2402	85.2818	81.7927	74.6897	84.9539	68.817	84.9293	0.391421
FBtr0072320	FBgn0035039	CG3608	44.1779	42.21	42.2808	44.3559	46.5506	45.8855	40.8694	45.5469	46.0799	47.8167	45.1769	44.8825	0.464708
FBtr0072321	FBgn0015040	Cyp9c1	0	0	0	0	0	0	0	0	0	0	0	0	NA
FBtr0072322	FBgn0035042	CG3640	0	0	0	0	0	0	0	0	0	0	0	0	NA
FBtr0072323	FBgn0035044	CG3663	55.955	54.6134	51.9369	45.2078	54.9908	52.783	53.9517	53.0154	55.791	45.0589	43.1395	51.5117	0.314413
FBtr0072324	FBgn0035046	NDUFA8	51.2695	56.1315	34.7125	41.7469	47.5522	34.1413	40.2908	51.8216	37.0414	43.9485	37.8925	36.3832	0.446579
FBtr0072325	FBgn0035046	NDUFA8	26.0086	28.4716	43.7421	21.9046	31.3091	24.2505	38.1425	38.5011	41.8627	41.2424	27.5982	25.4157	0.666056
FBtr0072326	FBgn0035046	NDUFA8	2.58751	5.66522	5.13403	0.768729	1.95426	5.16543	3.29065	2.33466	3.45772	7.09164	5.63027	2.08176	0.739415
FBtr0072327	FBgn0035047	Pof	6.6098	8.49032	8.08554	8.30963	7.65291	8.79523	10.4129	8.11928	6.9685	9.05464	6.68952	12.36	0.589193
FBtr0072328	FBgn0035047	Pof	36.5377	37.9019	35.8666	45.8516	39.481	35.5731	43.7464	42.6703	35.052	38.7651	38.7197	39.6375	0.571922
FBtr0072332	FBgn0260456	CG4806	71.9349	69.3525	75.2472	71.3043	71.1982	73.4684	76.0149	74.4545	71.9297	70.6786	76.7742	74.6001	0.457143
FBtr0072333	FBgn0050161	CG30161	0	0.297606	0.0717812	0	0	0	0	0	0	0	0	0	NA
FBtr0072334	FBgn0050163	Cpr60D	0	0	0	0	0	0	0	0.128146	0.263657	0.135932	0.14587	0	NA
FBtr0072335	FBgn0035043	CG4781	0	0	0	0	0	0	0	0	0	0.0667754	0	0	NA
FBtr0072336	FBgn0035041	CG13594	0	0	0	0	0	0	0	0	0	0	0	0	NA
FBtr0072337	FBgn0035040	CG4741	0.129394	0	0.27339	0.0694166	0	0.289015	0.352811	0.242578	0.124433	0.230765	0	0.0684017	NA
FBtr0072338	FBgn0035036	CG4707	44.4456	42.687	44.2977	41.8574	42.3245	45.2658	47.3933	47.566	45.7815	43.4525	48.2127	46.8241	0.459291
FBtr0072339	FBgn0035032	CG4692	516.759	487.64	477.805	475.003	499.68	457.608	477.735	470.005	477.918	540.54	452.413	501.787	0.640444
FBtr0072340	FBgn0035032	CG4692	65.9193	74.9956	72.5745	71.2952	92.3443	82.2239	82.3109	70.3708	94.9393	120.135	106.942	95.1299	0.183466
FBtr0072342	FBgn0035026	Fcp1	77.251	73.3243	71.4161	79.0609	77.6019	75.5034	76.5717	75.0894	76.7396	80.0641	80.1626	82.0565	0.436585
FBtr0072343	FBgn0016687	Nurf-38	8.38942	18.4273	11.7669	11.9038	16.7653	15.5882	4.22243	18.3427	12.0555	19.3619	14.6477	26.4647	0.485258
FBtr0072344	FBgn0035021	CG4622	69.2984	68.5292	67.547	63.4786	63.3233	67.506	67.3432	71.8644	64.826	69.0107	59.4392	66.6399	0.384013
FBtr0072346	FBgn0035016	CG4612	129.17	135.014	132.195	119.179	113.461	122.815	112.371	131.295	123.977	136.376	131.086	142.416	0.505822
FBtr0072347	FBgn0019886	Letm1	64.3512	72.9961	68.331	58.9183	54.1433	69.1176	70.246	70.6811	66.5101	51.5557	62.3449	64.1458	0.153495
FBtr0072348	FBgn0019886	Letm1	22.0987	34.2633	30.0836	31.6194	28.5415	33.125	31.4044	35.15	34.691	28.6539	38.3244	33.7816	0.508723
FBtr0072349	FBgn0019886	Letm1	1.50818	0.815626	0	1.2114	0.417521	0.425343	0.774201	0.761642	1.39965	1.18469	1.50934	2.42312	0.44384
FBtr0072350	FBgn0017556	Prosalpha4T2	0	0	0	0	0	0	0	0	0	0	0	0	NA
FBtr0072351	FBgn0015300	Ssl	0	0	0	0	0	0	0	0	0	0	0	0	NA
FBtr0072353	FBgn0035012	CG13590	0	0	0	0	0	0	0	0	0	0	0	0	NA
FBtr0072354	FBgn0035011	CG13589	0	0	0	0	0	0	0	0	0	0	0	0	NA
FBtr0072355	FBgn0035006	CG4563	0	0	0	0	0	0	0	0	0	0	0	0	NA
FBtr0072356	FBgn0035004	Pgam5-2	0	0	0	0	0	0	0	0	0	0	0	0	NA
FBtr0072357	FBgn0035003	CG15873	0	0	0	0	0	0	0	0	0	0	0	0	NA
FBtr0072362	FBgn0010414	SerT	0.0156546	0	0	0.0166923	0.01711	0	0	0	0.0300217	0	0.0493114	0	NA
FBtr0072363	FBgn0035001	slik	0	0	0.0879385	0.0823378	0.261165	0.277743	0.0868985	0.154458	0	0.081422	0	0	0.724789
FBtr0072364	FBgn0035001	slik	4.27654	2.74821	2.27574	3.94054	5.14901	4.03503	0.220851	2.17824	0.000893553	2.29502	4.77223	0.0722674	0.679452
FBtr0072366	FBgn0035001	slik	5.54213	5.59948	5.74669	6.47098	4.4152	6.36162	5.20317	8.05998	5.15416	4.32194	5.53143	8.50774	1
FBtr0072367	FBgn0000037	mAChR-A	0	0	0	0	0	0	0	0	0.00872303	0	0	0.00957675	NA
FBtr0072368	FBgn0000037	mAChR-A	0	0	0	0	0	0	0	0	1.22e-08	0	0	1.3e-08	NA
FBtr0072369	FBgn0050421	CG30421	0	0	0	0.180412	0	0.20683	0	0	0	0.752245	0	0	NA
FBtr0072370	FBgn0035056	spz6	0.0316762	0	0	0	0	0	0.0637955	0.0296867	0	0	0	0.0667938	NA
FBtr0072371	FBgn0035057	CG3880	0.145738	0.0799097	0	0	0	0.162636	0.0366913	0.204882	0.034979	0.0722103	0	0.230574	NA
FBtr0072374	FBgn0035063	Eap	66.4542	58.985	63.1343	55.9431	58.8661	61.8495	66.2788	64.9032	56.6409	58.3201	53.951	60.381	0.358196
FBtr0072375	FBgn0035065	CG3589	35.4691	34.834	32.4213	30.6394	31.2334	29.6234	34.6561	38.1463	33.2802	33.5713	31.6866	33.1037	0.383987
FBtr0072376	FBgn0035068	CG12849	0	0	0	0	0	0	0	0	0	0	0	0	NA
FBtr0072377	FBgn0035069	CG3611	0	0	0	0	0	0	0	0	0	0	0	0	NA
FBtr0072378	FBgn0000157	Dll	0	0	0	0	0	0	0	0	0	0	0	0	NA
FBtr0072379	FBgn0000157	Dll	0	0	0	0	0	0	0	0	0	0	0	0	NA
FBtr0072380	FBgn0035070	CG3650	0	0	0	0	0	0	0	0	0	0	0	0	NA
FBtr0072391	FBgn0022343	CG3760	172.893	161.848	144.136	151.133	152.889	136.892	163.851	151.9	139.018	163.869	134.704	166.208	0.519711
FBtr0072392	FBgn0022343	CG3760	140.664	129.343	121.972	115.618	141.242	129.029	130.698	145.642	129.975	158.309	114.978	133.25	1
FBtr0072393	FBgn0035085	CG3770	13.7378	16.7749	14.2612	18.9476	21.9694	20.6559	18.7379	20.3866	13.6803	16.2866	20.1671	19.0072	0.301936
FBtr0072395	FBgn0035088	CG3776	89.2201	85.328	90.675	81.7376	91.1766	86.999	91.48	89.4466	97.2837	90.6531	93.0936	93.9818	0.473494
FBtr0072396	FBgn0035091	CG3829	0.0946758	0.0949287	0	0	0	0.0481819	0.0744572	0.085186	0.0414028	0	0.0452748	0	NA
FBtr0072397	FBgn0004055	uzip	15.205	12.8121	12.6445	12.1508	11.2455	13.3443	12.892	13.2877	15.1744	15.2787	16.4939	12.99	0.827468
FBtr0072398	FBgn0265434	zip	1.63519	1.19187	0.92942	4.63161	3.63788	2.86726	1.62838	1.00791	3.32107	2.76467	6.01973	4.94956	0.0232184
FBtr0072399	FBgn0265434	zip	0	0	0	0	0	0	0	0	0	0	0	0	NA
FBtr0072400	FBgn0010435	emp	0	0	0	0	0	0	0	0	0	0.0572422	0	0	NA
FBtr0072401	FBgn0010435	emp	0.0507799	0.024776	0.0951592	0.0722967	0.0247083	0.151144	0.068213	0	0.0649865	0	0	0.0713713	NA
FBtr0072402	FBgn0010435	emp	0	0	0	0	0	3.36e-10	0	0	0	0	0	0	NA
FBtr0072403	FBgn0035090	CG2736	0	0.0660167	0.0317178	0	0	0	0.121208	0	0	0	0.0633269	0.0634452	NA
FBtr0072404	FBgn0035089	Phk-3	0.118893	0	0	0.128379	0.132247	0	0	0	0	0.118245	0.253361	0	NA
FBtr0072405	FBgn0002607	RpL19	12.9441	11.1142	12.0484	16.1123	17.4464	13.1202	12.0833	14.7753	16.6841	13.6565	14.5462	18.7252	0.32749
FBtr0072406	FBgn0002607	RpL19	3158.23	3341.6	3383.63	2864.99	2962.63	3065.22	3126.38	3289.87	3134.52	3000.88	2762.02	2834.99	0.148632
FBtr0072409	FBgn0027599	CG2790	69.0902	65.3628	68.5581	64.2475	62.6635	66.3518	66.3619	63.948	65.5669	71.2479	69.4931	66.7322	0.468821
FBtr0072410	FBgn0035084	CG15861	1.80772	3.01999	3.64829	1.98486	4.15857	3.43118	4.66712	3.90735	1.71553	2.38974	2.40604	1.04103	0.635627
FBtr0072411	FBgn0035083	Tina-1	199.008	189.692	212.644	188.701	187.445	160.926	186.285	170.716	171.618	198.23	177.565	184.747	0.354245
FBtr0072412	FBgn0035082	CG2811	68.391	72.0281	72.3113	54.9753	56.0531	55.0239	62.8788	65.2101	58.1228	50.6293	49.0631	56.8036	0.0476403
FBtr0072413	FBgn0043792	CG30427	0	0	0	0	0	0	0	0	0	0	0	0	NA
FBtr0072414	FBgn0043792	CG30427	0	0	0	0	0	0	0	0	0	0	0	0	NA
FBtr0072415	FBgn0043792	CG30427	0	0	0	0	0	0	0	0	0	0	0	0	NA
FBtr0072416	FBgn0043792	CG30427	0	0	0	0	0	0	0.032682	0	0	0	0	0	NA
FBtr0072417	FBgn0060296	pain	0	0	0	0	0	0	0	0	0	0	0	0.0172923	NA
FBtr0072420	FBgn0035076	Ance-5	0.241343	0.158877	0.0762843	0	0.0528333	0.0269237	0.0729027	0.0678528	0.115767	0	0.101489	0.0508582	NA
FBtr0072423	FBgn0035073	CG16896	37.0615	43.3177	43.4884	45.0241	40.8729	49.6021	47.0368	45.675	45.7152	36.1996	48.5157	39.9998	1
FBtr0072425	FBgn0023181	Orc4	92.6325	93.5768	88.3705	81.9319	88.2327	86.532	92.401	91.0312	91.3651	102.134	77.9127	79.5147	0.477576
FBtr0072426	FBgn0028738	ETH	7.94137	10.1423	5.11338	5.56148	6.3399	8.34323	9.29023	7.055	7.00335	6.04714	4.71226	5.01006	0.460966
FBtr0072427	FBgn0015801	Reg-5	8.39934	11.9389	8.11487	8.3262	9.82014	11.5007	11.7552	12.1527	9.26601	7.9393	9.11736	10.9104	0.65819
FBtr0072428	FBgn0041205	key	46.1182	45.1434	46.3046	42.6157	46.6788	43.9496	42.2109	43.2869	42.3329	41.1923	34.8928	42.7484	0.365981
FBtr0072429	FBgn0035064	Aats-tyr-m	33.494	34.639	31.6807	30.9495	32.3865	30.2199	36.4083	36.7611	35.9823	35.3502	29.0153	32.4792	0.459291
FBtr0072430	FBgn0025578	Lcp9	0	0	0	0	0	0	0	0	0	0	0	0	NA
FBtr0072433	FBgn0035060	Eps-15	0	0.221261	0	0	0	0.980326	0.249355	0	0.621204	0.236384	0.45775	0.206436	0.473303
FBtr0072434	FBgn0035060	Eps-15	19.7046	24.1359	19.8004	22.8798	26.8538	29.4776	19.3674	17.9116	16.9255	15.2896	17.599	24.8774	1
FBtr0072435	FBgn0035060	Eps-15	54.2256	55.4598	55.4227	66.7389	53.798	59.7098	57.7151	54.3649	56.4988	49.6696	83.0766	70.7231	0.473976
FBtr0072436	FBgn0027590	GstE12	67.4159	72.4269	72.2244	61.4479	67.8992	61.2542	70.0958	67.7849	57.115	62.8078	67.3482	60.1452	0.264865
FBtr0072437	FBgn0040666	CG12848	146.306	141.193	147.075	107.11	124.573	119.433	143.911	134.205	120.645	145.365	119.292	132.171	0.273384
FBtr0072441	FBgn0035050	ST6Gal	0	0	0	0	0	0	0	0	0	0	0	0	NA
FBtr0072442	FBgn0035050	ST6Gal	0	0	0	0	0	0	0	0	0	0	0	0	NA
FBtr0072443	FBgn0035092	Nplp1	0	0.0549661	0.0791832	0	0.0274232	0	0	0.0234758	0	0	0	0	NA
FBtr0072444	FBgn0001148	gsb	0	0	0	0	0.0346705	0	0	0	0	0	0.0332933	0	NA
FBtr0072445	FBgn0050198	tRNA:CR30198	0	0	0	0	0	0	0	0	0	0	0	0	NA
FBtr0072446	FBgn0050199	tRNA:CR30199	0	0	0	0	0	0	0	0	0	0	0	0	NA
FBtr0072447	FBgn0050200	tRNA:CR30200	0	0	0	0	0	0	0	0	0	0	0	0	NA
FBtr0072448	FBgn0050430	CG30430	0	0	0	0	0	0	0	0	0	0	0	0	NA
FBtr0072449	FBgn0001325	Kr	0	0	0	0	0	0	0	0	0	0.0196962	0.0779397	0.0628577	NA
FBtr0072450	FBgn0050429	CG30429	0	0.114029	0.0549135	0.0557291	0	0	0.104801	0	0.0999835	0	0.219668	0.329665	NA
FBtr0072451	FBgn0050428	CG30428	0	0.628482	0.302833	0	0.126291	0.128093	0.231113	0	0.317497	0.113805	0.314176	0	NA
FBtr0072454	FBgn0004181	Peb	0	0	0	0	0	0	0	0	0	0	0	0	NA
FBtr0072455	FBgn0011694	PebII	0	0	0	0	0	0	0	0	0	0	0	0	NA
FBtr0072457	FBgn0266129	lov	0	0.0826108	0	0	0	0.08386	0	0	0.0720612	0	0	0	NA
FBtr0072458	FBgn0266129	lov	0	1.15e-06	0	0.22619	0.16609	8.25e-07	0	0	6.69e-07	0	0.109626	0.42475	NA
FBtr0072459	FBgn0004919	gol	0	0	0	0	0	0	0	0	0	0	0	0	NA
FBtr0072461	FBgn0001147	gsb-n	0	0	0	0	0	0	0	0	0	0	0	0	NA
FBtr0072462	FBgn0052475	mthl8	0.270963	0.215152	2.88e-07	0.0163389	0.100011	0	0.153876	0	0	0.16342	0.518692	0	NA
FBtr0072463	FBgn0002564	Lsp1gamma	0.0201885	0	0.106326	0	0	0.0450388	0	0	0	0.0199892	0.0212117	0	NA
FBtr0072464	FBgn0020386	Pdk1	48.7684	53.2357	56.0768	70.3573	63.3191	61.7234	51.0163	52.3443	56.2759	54.8347	78.3612	70.9737	0.172135
FBtr0072465	FBgn0020386	Pdk1	21.0123	22.3166	22.1996	27.0682	21.2321	21.0037	17.7453	15.1663	19.0507	16.309	28.6545	23.9252	1
FBtr0072466	FBgn0020386	Pdk1	0.592171	0.730703	0.770966	1.29779	0.94071	0.428003	0.197417	0.981715	0.562552	1.06922	1.1635	1.64117	0.485615
FBtr0072467	FBgn0020386	Pdk1	4.19786	4.60695	4.04243	3.41258	4.38131	4.40542	2.7915	2.72896	3.22284	5.48534	5.31761	3.06668	0.734869
FBtr0072468	FBgn0020386	Pdk1	94.784	96.3274	77.6865	72.3319	71.5494	90.783	89.6189	86.0283	68.6485	90.6073	93.002	89.6687	0.653622
FBtr0072469	FBgn0020386	Pdk1	13.3354	9.33449	6.14911	14.057	12.6287	12.4913	8.10208	6.35808	11.7115	10.4643	20.9348	13.2195	0.34166
FBtr0072470	FBgn0020386	Pdk1	3.32688	3.72808	5.90982	11.8577	5.41147	3.88858	5.25293	4.1277	4.11564	4.39643	5.29027	6.72953	0.607591
FBtr0072471	FBgn0020386	Pdk1	3.92071	2.9195	1.28935	2.47336	3.97126	4.99738	3.59748	2.3484	5.75438	2.3049	5.2466	6.22907	0.460072
FBtr0072475	FBgn0035101	p130CAS	0	0	0	0	0	0	0	0	0	0	0	0	NA
FBtr0072476	FBgn0035104	CG13875	0.0259951	0.142594	0	0.0832636	0.142312	0.116004	0.0785252	0	0	0.180224	0	0	NA
FBtr0072477	FBgn0027786	Mtch	25.7439	25.1912	27.8768	21.9736	20.3057	18.6774	20.3974	19.6053	20.1755	21.9004	19.2922	18.8824	0.230736
FBtr0072478	FBgn0027786	Mtch	48.7022	60.8427	60.0856	50.0701	47.2064	54.9089	48.3013	62.5795	42.4598	49.7169	42.0813	49.0041	0.215721
FBtr0072479	FBgn0027786	Mtch	5.27025	4.55844	7.18596	4.92626	5.99768	3.8714	9.13606	8.39292	8.29208	3.61908	7.12028	4.78433	0.663759
FBtr0072480	FBgn0035107	mri	51.6243	47.0655	49.6496	48.2847	54.5041	50.8609	52.0191	54.3247	54.8563	46.6244	50.062	48.235	0.503768
FBtr0072481	FBgn0035107	mri	44.6392	43.3467	47.1263	44.891	37.6817	45.9216	41.1092	39.5247	42.085	45.2277	42.906	46.3668	0.501347
FBtr0072483	FBgn0024945	NitFhit	46.7203	46.9342	43.5229	43.5697	47.1145	46.3333	44.7256	44.7546	45.7741	52.3656	47.161	46.8006	0.514427
FBtr0072484	FBgn0035109	CG13876	22.4763	22.0181	18.4847	19.0015	16.9134	17.4658	19.1379	20.1302	20.3562	20.4175	19.4773	20.0071	0.436585
FBtr0072486	FBgn0035111	CG16940	36.6773	38.7956	36.8398	35.1755	35.8565	43.488	37.0465	49.8935	44.2472	32.8033	34.6471	29.9678	0.437648
FBtr0072487	FBgn0035111	CG16940	66.7032	64.8618	67.3765	70.3351	65.2388	58.8079	68.3374	55.1191	62.8673	75.6806	76.9226	82.3198	0.522472
FBtr0072488	FBgn0063923	Kaz1-ORFB	0.279611	1.91019	1.33254	0.0207568	1.13338	0.777108	0.730493	1.07198	0.661301	0.682229	0.793795	0.24267	0.60656
FBtr0072493	FBgn0063923	Kaz1-ORFB	0.167408	0	0	0.102625	0.0912518	0.373309	0.421401	0	0	0	0	0	NA
FBtr0072499	FBgn0053229	CG33229	112.402	113.477	142.446	123.1	143.448	131.57	134.214	144.13	120.179	138.251	106.365	116.144	1
FBtr0072501	FBgn0052476	mthl14	0	0.0536391	0.103022	0.13047	0.080273	0.02727	0.0492267	0	0.211064	0.0726259	0	0.0257567	NA
FBtr0072503	FBgn0035122	mRpL17	98.0116	99.3902	105.375	99.0876	111.638	93.6508	105.811	101.164	106.356	116.965	99.8284	93.7361	1
FBtr0072504	FBgn0027111	miple	1.87e-07	0	4.27e-07	2.63e-07	0	0.0301732	0	3.41e-07	0	4.18e-07	4.27e-07	1.92e-07	NA
FBtr0072505	FBgn0027111	miple	0.0246109	0	0.0517943	0.0261417	0	0	0	0.0697394	0	0.0486439	0.0781205	0.0259511	NA
FBtr0072506	FBgn0029002	miple2	7.51186	9.90629	13.3182	8.93484	8.22631	10.995	4.29305	3.32351	8.33488	15.6402	14.4107	14.2166	0.499806
FBtr0072507	FBgn0035124	ttm2	0	0	0.036672	0	0	0	0	0	0	0.0689289	0	0	NA
FBtr0072515	FBgn0004373	fwd	61.4502	64.4124	59.4535	67.0876	52.9971	65.1276	54.7928	55.5773	59.3342	58.1348	84.512	70.3282	0.693334
FBtr0072516	FBgn0004373	fwd	11.1557	12.8872	13.4735	16.2961	13.1136	16.5389	11.8639	11.6144	15.1446	9.97708	22.2424	17.4547	0.482335
FBtr0072517	FBgn0004373	fwd	0.352714	0.396883	1.12122	0	0.893507	0.157906	0.855643	0.344742	0.47756	0.135415	0.463564	0	0.444425
FBtr0072518	FBgn0052845	CG32845	0.0788289	0	0	0.141736	0.0289088	0	0.0544047	0.0250702	0	0.0261929	0.0279643	0.111681	NA
FBtr0072519	FBgn0035121	Tudor-SN	369.734	382.543	379.906	346.493	335.047	345.409	426.47	395.149	420.676	235.176	457.74	314.539	0.447419
FBtr0072520	FBgn0024806	DIP2	42.2805	46.0318	38.1201	43.0763	44.4753	45.0234	44.8066	44.7835	42.3558	41.3356	46.0918	48.0825	0.496276
FBtr0072521	FBgn0000541	E(bx)	3.35e-05	9.9e-08	0.00174411	0.0120707	0.142539	0.000409343	0.0010548	0.000125317	0.0575133	0.123688	1.07e-06	0.00143017	NA
FBtr0072522	FBgn0000541	E(bx)	1.07e-07	0	0.0113407	0.00999651	0.114309	0.000246695	0.00131147	2.16e-05	0.129855	4.0937	4.28e-09	6.63e-05	NA
FBtr0072523	FBgn0000541	E(bx)	37.3951	45.5771	42.2741	42.1559	40.8855	42.4956	34.0566	37.5117	37.7981	32.1597	52.4061	43.8953	1
FBtr0072524	FBgn0035113	pyx	1.40636	0.928982	1.00891	0.451019	0.938069	2.72042	0.814436	0.629789	1.09771	1.19483	2.62539	0.890831	1
FBtr0072525	FBgn0035113	pyx	0	0	0	0	0	0	0	0	0	0	0	0	NA
FBtr0072526	FBgn0035110	thoc7	113.61	112.944	107.797	99.0513	110.004	107.924	105.537	118.956	104.698	114.971	99.1196	99.0898	0.389406
FBtr0072527	FBgn0035110	thoc7	5.25878	5.23765	8.90725	5.89148	5.47857	5.55381	3.86011	5.559	3.50742	5.14034	4.56384	4.71706	0.579201
FBtr0072528	FBgn0027587	CG7028	38.4106	50.8688	37.2407	48.5937	44.403	49.4692	51.5873	40.6305	50.5911	44.2171	64.5246	53.464	0.332397
FBtr0072529	FBgn0025592	Gyk	34.4017	35.6392	31.9341	41.6131	41.5168	37.3414	35.3635	33.2126	38.7267	38.3161	40.1782	42.8797	0.237188
FBtr0072530	FBgn0025592	Gyk	0	0	0	0.396158	0	0	0	0	0	0	0.353949	0.375192	NA
FBtr0072532	FBgn0035106	rno	9.13823	8.7924	9.03249	17.4166	6.97006	12.5464	8.29669	10.4972	10.1307	11.9333	12.7743	13.1822	0.42513
FBtr0072534	FBgn0035103	Vdup1	9.5e-06	4.28e-05	0	0	0	0	0	0	0	0	0	0	NA
FBtr0072535	FBgn0035103	Vdup1	0	0	0	0	0	0	0	0	0	0	0	0	NA
FBtr0072536	FBgn0035103	Vdup1	0	0	0	0	0	0	0	0	0	0	0	0	NA
FBtr0072537	FBgn0035102	CG7049	35.1796	26.8015	29.3387	30.6919	34.2903	30.74	37.829	37.2191	40.9789	42.9057	37.4603	37.943	0.402935
FBtr0072538	FBgn0263988	Dic61B	5.29e-08	0.0418063	9.21e-08	3.94e-08	5.77e-08	9.65e-08	2.39e-08	0.160653	0.0548049	3.02e-08	0.0800402	2.72e-08	NA
FBtr0072539	FBgn0263988	Dic61B	0.0384969	0	0.0608213	0.0205337	0.0210509	0.0644108	0.0193801	0	0	0.0190575	0	0.0202728	NA
FBtr0072540	FBgn0040688	CG12483	0	0	0	0	0	0.11507	0	0	0	0	0	0	NA
FBtr0072541	FBgn0035097	CG13405	0	0	0	0	0	0	0	0	0	0	0	0	NA
FBtr0072546	FBgn0035134	CG1231	0.0433439	0.142556	0.320076	0	0.0952011	0.0483786	0.174613	0.324993	0.124888	0.17187	0.274175	0.13723	NA
FBtr0072547	FBgn0040291	Roc1b	0	0	0	0	0	0	0	0	0	0	0	0	NA
FBtr0072548	FBgn0035137	CG1233	27.2148	27.4024	28.6425	27.251	25.2605	32.4438	27.1537	30.9545	26.4246	26.0747	30.9191	31.3427	0.566227
FBtr0072549	FBgn0035137	CG1233	7.80909	10.2906	6.12213	8.77429	7.3167	4.84398	10.7788	8.34176	9.04133	7.37667	8.59435	8.84234	1
FBtr0072550	FBgn0035140	CG17180	0	0	0	0	0	0.930209	0	0	0	0	0	0	NA
FBtr0072551	FBgn0035142	hipk	33.5383	38.0324	34.6799	41.8848	33.7885	44.8881	34.0927	33.4942	30.6194	27.1253	53.5264	48.0889	0.629114
FBtr0072552	FBgn0035142	hipk	0.247277	0.382209	0.480155	0.546236	0.519328	0.582604	0.221824	0.224277	0.333286	0.262269	0.728388	0.523871	0.491314
FBtr0072553	FBgn0035143	Ppm1	0	0	0	0	0	0	0	0	0	0	0	0	NA
FBtr0072554	FBgn0035145	MED14	61.509	65.8725	59.1607	72.0715	60.4305	71.1078	55.2978	52.5827	59.298	53.0289	92.6145	79.7948	0.534018
FBtr0072556	FBgn0035147	Gale	22.4595	23.8595	23.3919	23.9273	22.6985	25.369	26.003	28.7102	24.499	20.827	24.6806	28.2173	0.518
FBtr0072557	FBgn0035150	Rev1	39.9465	40.8794	43.7442	44.4091	42.3665	46.6752	47.1862	44.6536	43.9537	44.7681	42.7149	47.0674	0.457292
FBtr0072558	FBgn0035149	MED30	53.4124	43.7838	46.4073	43.7376	44.5743	49.6982	47.0916	45.9179	43.4898	53.508	42.4166	47.7427	0.631828
FBtr0072559	FBgn0035148	CG3402	98.2026	101.462	99.3759	95.1301	100.034	99.4877	95.1979	100.318	102.393	101.221	97.4173	96.2136	0.437648
FBtr0072561	FBgn0016715	Reg-2	0.580692	0	0.204484	0.899946	0.213355	0.720572	0.194995	0.12096	0.18614	0.384188	0.13647	0.13643	NA
FBtr0072562	FBgn0035146	CG13893	0.0643303	0.101689	0	0.0494753	0.0761336	0.077569	0.109638	0.0434271	0.0222269	0.0459286	0	0	NA
FBtr0072563	FBgn0035144	Kah	0	0	0	0	0	0	0	0	0	0	0	0	NA
FBtr0072564	FBgn0035141	Cypl	99.8504	94.276	95.3244	79.3107	96.5224	89.7281	101.437	98.5934	90.1238	100.014	84.8163	85.3963	0.395651
FBtr0072565	FBgn0001316	klar	4.21837	12.2925	3.79101	11.0015	10.3439	20.8425	9.14463	10.1536	11.4852	9.31302	23.1731	17.511	0.189193
FBtr0072566	FBgn0035139	CG13891	0	0	0	0	0	0.0863768	0	0	0.223246	0.153577	0	0	NA
FBtr0072568	FBgn0035138	CG13884	0	0	0	0	0	0	0	0	0	0	0.0802143	0	NA
FBtr0072569	FBgn0265574	Cdc5	0.374331	1.23333	0	0	0	0.417323	0.75361	0.70152	0.358607	0.37025	0.784288	0.393614	1
FBtr0072570	FBgn0023000	mth	15.2295	13.3994	14.3884	16.2467	16.0342	13.9547	13.2833	13.4701	15.1107	16.375	15.7972	19.807	0.437648
FBtr0072571	FBgn0023000	mth	0	0.404423	0	0	0	0	0	0	0.50387	0	0	0	NA
FBtr0072572	FBgn0035132	mthl10	0.207394	0	0.00038116	0	0	0	0.218759	0.0320785	0	0	0	0	NA
FBtr0072573	FBgn0035132	mthl10	0	0	0	0	0	0	0	0	0	0	0	0	NA
FBtr0072574	FBgn0035131	mthl9	0.191423	0.105013	0.0252102	0.127703	0	0.186852	0.192743	0.134544	0.0688652	0.142177	0.0754632	0.0756333	NA
FBtr0072576	FBgn0052344	CG32344	74.1329	79.5526	81.1643	74.3997	72.6195	76.1328	79.2612	78.2674	74.1929	73.6355	78.6765	80.7074	0.404579
FBtr0072577	FBgn0035155	RabX6	10.2097	11.6163	11.0158	11.5806	11.5268	12.2261	12.9809	11.6522	12.9447	13.253	12.921	13.7383	0.438438
FBtr0072578	FBgn0000575	emc	34.7029	38.8687	40.593	38.1673	38.4279	38.2966	36.2761	42.0985	35.859	33.8493	34.5173	42.5698	0.499806
FBtr0072579	FBgn0052480	tRNA:CR32480	0	0	0	0	0	0	0	0	0	0	0	0	NA
FBtr0072580	FBgn0052481	tRNA:CR32481	0	0	0	0	0	0	0	0	0	0	0	0	NA
FBtr0072583	FBgn0035165	CG13887	185.166	187.503	188.007	179.133	178.466	179.679	191.177	186.012	186.772	195.824	184.3	191.643	0.459434
FBtr0072584	FBgn0035165	CG13887	7.05329	0	5.07102	0	2.6509	0	3.82894	1.10865	6.00181	4.48795	2.23132	4.47286	1
FBtr0072585	FBgn0035167	Gr61a	0.165663	0	0	0	0	0	0	0.384022	0	0	0	0	NA
FBtr0072586	FBgn0035168	CG13889	0.00798615	0.0175359	0.0168107	0	0	0.00890528	0.0723574	0.0299344	0.0153086	0.00790234	0.00837596	0.0252095	NA
FBtr0072587	FBgn0035169	CG13890	94.4267	97.7839	92.5511	86.0399	89.8812	96.4202	99.4677	107.141	92.33	91.1323	84.4438	91.2222	0.345192
FBtr0072589	FBgn0052479	CG32479	109.636	116.829	104.231	155.105	127.759	150.298	114.33	96.8022	106.758	94.903	201.566	167.655	0.382368
FBtr0072592	FBgn0028999	nerfin-1	0	0	0	0	0	0	0	0	0	0	0	0	NA
FBtr0072593	FBgn0035173	CG13907	8.20164	11.057	10.1775	12.3865	9.95717	12.6477	9.34344	8.74364	12.0915	7.335	14.8687	13.8916	0.599257
FBtr0072594	FBgn0035170	dpr20	0.073969	0.0405876	0.0389527	0.0394503	0.0808853	0	0.0372372	0.0346591	0.0532043	0.0549243	0.0194247	0	NA
FBtr0072596	FBgn0035164	CG13901	47.9869	40.516	40.7721	38.4698	41.5029	35.4015	44.7711	44.5726	41.7173	51.8726	40.4826	39.6134	0.736522
FBtr0072597	FBgn0035162	CG13900	182.988	183.078	192.846	223.079	200.985	197.475	186.986	162.063	144.84	168.603	229.194	235.944	0.482886
FBtr0072599	FBgn0035161	CG13898	0	0	0	0	0	0	0	0	0	0	0	0	NA
FBtr0072600	FBgn0052482	tRNA:M-i:61D	0	0	0	0	0	0	0	0	0	0	0.793579	0	NA
FBtr0072601	FBgn0035160	hng3	51.3739	56.2067	44.7663	44.4484	40.2756	46.3346	49.3688	56.8177	41.0448	51.3526	47.0557	47.2345	0.430735
FBtr0072602	FBgn0035159	CG13896	1.49283	2.18855	0.40831	0.723497	2.87988	2.27325	2.49936	2.61141	1.84503	1.16091	1.51946	3.55785	0.663296
FBtr0072603	FBgn0025676	CkIIalpha-i3	16.6382	14.3575	17.7592	22.5152	20.4426	21.9552	13.0976	9.63784	19.1821	17.3078	19.2297	18.0934	0.444425
FBtr0072604	FBgn0025676	CkIIalpha-i3	0.641329	0.388653	0.888381	2.90623	0	0.564474	1.34916	0.724172	1.53784	0.676704	1.47572	0.36814	0.867009
FBtr0072605	FBgn0035158	CG13895	7.16653	5.51519	5.10042	7.13836	6.96515	6.83187	6.54306	5.88923	7.31251	8.35613	8.09947	6.93267	0.368549
FBtr0072606	FBgn0035157	CG13894	0	0	0	0	0	0	0	0	0	0	0	0	NA
FBtr0072607	FBgn0260862	Vti1	58.9846	57.0328	59.6588	56.5786	59.4893	60.1186	60.9873	61.596	62.501	61.5563	61.888	63.7947	0.459902
FBtr0072608	FBgn0052483	CG32483	0	0	0	0	0.042211	0	0	0	0	0.0381251	0	0.0405815	NA
FBtr0072609	FBgn0035154	CG3344	0.0356423	0.117262	0.150326	0.114304	0.117271	0.278418	0.143573	0.367448	0.205301	0.0706374	0.187669	0.225545	NA
FBtr0072610	FBgn0035153	ebd1	59.0001	60.2944	52.7695	49.0153	58.7152	55.7811	65.436	70.9462	47.82	62.2829	40.7644	52.907	0.501347
FBtr0072611	FBgn0035152	CG3386	3.17358	8.31002	4.75992	6.93592	7.6652	4.04783	7.00651	8.47903	8.44482	9.174	7.21863	5.11599	0.734788
FBtr0072612	FBgn0035151	CG17129	26.3603	36.9047	30.4374	18.3239	19.5833	18.4909	36.5444	28.7738	28.9844	19.4849	20.2336	25.3621	0.0790716
FBtr0072613	FBgn0035151	CG17129	33.7862	32.8117	40.6503	36.4228	40.5324	41.6323	41.7272	49.7492	40.4545	31.2134	41.1125	36.4466	0.908844
FBtr0072614	FBgn0035151	CG17129	6.10346	3.17714	3.23676	4.68341	5.22831	2.66306	4.35409	4.10995	5.12572	1.43626	5.76131	1.26124	0.544212
FBtr0072619	FBgn0035179	CG12038	0.326658	0.119408	0.191358	0.310422	0.0796225	0.688561	0.584819	0.408199	0.174226	0.107901	0.267576	0.382818	0.668578
FBtr0072621	FBgn0035181	CG9205	3.18777	4.15844	3.67705	5.69681	4.47599	7.48549	1.42156	3.41219	4.57179	4.76615	9.58034	11.7341	0.210477
FBtr0072622	FBgn0035181	CG9205	134.497	138.558	135.743	122.534	126.299	121.247	132.771	141.802	133.732	126.545	114.5	118.077	0.149743
FBtr0072625	FBgn0035186	CG13912	2.12292	1.93734	2.39318	1.59568	2.02997	1.73893	2.06748	1.72467	1.76995	3.30172	1.57302	2.91933	0.641653
FBtr0072626	FBgn0040281	Aplip1	0	0	0	0	0	0.0236341	0	0	0	0	0	0	NA
FBtr0072627	FBgn0040281	Aplip1	0	0	0	0	0	0	0	0	0	0	0	0	NA
FBtr0072628	FBgn0004425	LysB	0	0	0	0	0	0	0	0	0	0	0	0	NA
FBtr0072629	FBgn0004426	LysC	0	0	0	0	0	0	0	0	0	0	0	0	NA
FBtr0072630	FBgn0004428	LysE	0	0	0	0	0	0	0	0	0	0	0	0	NA
FBtr0072631	FBgn0004430	LysS	0	0	0	0	0	0	0	0	0	0	0	0	NA
FBtr0072633	FBgn0004429	LysP	0	0	0	0	0	0	0	0	0	0	0	0	NA
FBtr0072634	FBgn0004427	LysD	0	0	0	0	0	0	0.143201	0	0	0.141651	0.304153	0	NA
FBtr0072635	FBgn0035189	CG9119	5.8432	8.65498	9.36476	2.53002	7.25137	12.5464	19.362	21.1957	12.4246	6.85413	7.80759	3.43675	0.604289
FBtr0072637	FBgn0004431	LysX	0	0	0	0	0	0	0	0	0	0	0	0	NA
FBtr0072638	FBgn0035187	Trh	0	0	0	0	0	0	0	0	0	0	0	0	NA
FBtr0072639	FBgn0025525	bab2	0	0	0	0	0	0	0	0	0	0	0	0	NA
FBtr0072642	FBgn0004870	bab1	0.000897981	0.00179466	0.00120133	0.00145014	0.00150685	0.141847	0.00154595	0.132835	0.00106132	0.000730261	0.000646246	0.000941379	NA
FBtr0072644	FBgn0024277	trio	34.057	39.599	35.4273	41.8093	33.1499	46.3242	34.8115	31.2464	29.5212	28.4869	59.9544	51.4013	0.585815
FBtr0072645	FBgn0024277	trio	5.56651	6.72671	5.74989	8.52979	6.2143	6.13541	6.21665	6.03749	8.2675	4.61082	10.6308	7.91869	0.610481
FBtr0072646	FBgn0024277	trio	0.0441012	0	0	0	0.0250842	0	0	0.0210625	0	0	0	0	NA
FBtr0072647	FBgn0024277	trio	0	0	0	0	0	0	0	0	0	0	0	0	NA
FBtr0072648	FBgn0024277	trio	0	0	0	0	0	0	0	0	0	0	0	0	NA
FBtr0072649	FBgn0024277	trio	0	0	0	0	0	0	0.0692851	0	0	0.099364	0	0.0974711	NA
FBtr0072651	FBgn0035192	CG9194	0	0	0	0.0181084	0.0185785	0.0944228	0.0341184	0.0316947	0.0162788	0	0.0178471	0.0357616	NA
FBtr0072652	FBgn0035195	Sac1	109.551	121.643	116.628	105.306	107.759	113.121	118.976	118.399	118.42	104.495	112.575	114.834	0.302107
FBtr0072653	FBgn0035196	CG9129	0.101493	0.0556177	0.0535608	0.054352	0	0.0566526	0.0511133	0.0951287	0.195043	0.0503254	0.107117	0.375126	NA
FBtr0072655	FBgn0035197	CG9130	0	0	0	0	0	0	0	0	0	0	0	0	NA
FBtr0072657	FBgn0035197	CG9130	0	0	0	0	0	0	0	0	0	0.0081427	0	0	NA
FBtr0072659	FBgn0035199	CG9134	0	0.0261873	0	0	0	0	0	0	0	0	0	0	NA
FBtr0072660	FBgn0035199	CG9134	0	0	0	0	0	0	0	0	0	0	0	0	NA
FBtr0072661	FBgn0035199	CG9134	0	0	0	0.0628614	0	0	0	0	0	0	0	0	NA
FBtr0072662	FBgn0052333	CG32333	0	0	0	0	0	0	0	0	0	0	0	0	NA
FBtr0072663	FBgn0262937	Rabex-5	48.6969	46.4539	49.6788	46.5862	47.5775	47.1529	49.6118	50.5976	49.9251	50.312	51.1514	52.7368	0.474446
FBtr0072667	FBgn0035203	CG9149	90.7548	88.9976	88.6035	87.3586	96.9727	98.365	95.3205	100.394	90.2027	105.314	87.0276	92.2737	0.81696
FBtr0072668	FBgn0035205	CG2469	0.541166	0.528153	0.56529	0.434879	0.447141	1.95568	0	0	0	0	0.906391	0	0.480444
FBtr0072669	FBgn0035205	CG2469	91.206	96.4505	92.7179	97.3536	90.2254	101.009	98.3403	100.049	99.6228	96.6542	111.205	107.175	0.394396
FBtr0072670	FBgn0035207	CG9153	0.00813178	5.23e-05	0	1.31125	0.637551	2.51e-06	0.460912	0.00975507	1.95024	0.000684561	1.61413	0.513521	NA
FBtr0072671	FBgn0035207	CG9153	34.5205	37.5739	36.6805	41.4236	36.4605	38.5225	34.7366	33.6652	34.4415	39.2772	52.3968	47.5701	0.237558
FBtr0072672	FBgn0010246	Myo61F	6.80166	6.0271	8.33803	5.47121	4.29618	5.40075	7.16722	6.99443	5.93923	6.1451	5.31496	5.03982	0.183466
FBtr0072673	FBgn0010246	Myo61F	0	0	0	0	0	0	0	0	0	0	0	0	NA
FBtr0072674	FBgn0010246	Myo61F	0	0	0	0	4.12e-10	0	0	0	0	0	1.74e-06	1.47e-05	NA
FBtr0072675	FBgn0010246	Myo61F	0	0	0	0	0	0	0	0	0	0	0	0	NA
FBtr0072676	FBgn0011361	mtacp1	151.282	162.308	156.43	143.299	168.451	164.616	140.48	170.472	156.305	161.197	141.098	149.333	0.499789
FBtr0072677	FBgn0011361	mtacp1	202.981	185.822	207.559	205.848	198.58	178.938	205.832	198.349	216.078	247.822	204.344	197.526	1
FBtr0072678	FBgn0035209	msd1	215.416	181.615	227.937	221.941	223.839	210.884	208.36	205.598	211.451	216.425	190.377	186.414	0.680873
FBtr0072679	FBgn0010786	l(3)02640	188.972	203.59	196.149	194.944	195.829	199.938	197.584	212.196	200.114	190.361	193.423	213.475	0.44203
FBtr0072680	FBgn0029514	CG9166	0.957183	0.630734	0.805517	0.54326	0.904243	0.71141	0.449637	0.777322	0.611317	0.757397	0.53479	0.670992	0.616976
FBtr0072681	FBgn0003295	ru	0	0.0315712	0	0.0307394	0	0.0642219	0	0	0.0276184	0.228073	0.12111	0	NA
FBtr0072682	FBgn0052330	tRNA:CR32330	0	0	0	0	0	0.519146	0	0	0	0	0	0	NA
FBtr0072683	FBgn0052328	tRNA:CR32328	0	0	0	0	0	0.519146	0	0	0	0	0	0	NA
FBtr0072684	FBgn0052329	tRNA:CR32329	0	0	0	0	0	0.519146	0	0	0	0	0	0	NA
FBtr0072685	FBgn0011851	tRNA:E4:62Aa	0	0	0	0	0	0.519146	0	0	0	0	0	0	NA
FBtr0072686	FBgn0011852	tRNA:E4:62Ab	0	0	0	0	0	0.519146	0	0	0	0	0	0	NA
FBtr0072687	FBgn0011853	tRNA:E4:62Ac	0	0	0	0	0	0.519146	0	0	0	0	0	0	NA
FBtr0072688	FBgn0052324	tRNA:CR32324	0	0	0	0	0	0.519146	0	0	0	0	0	0	NA
FBtr0072690	FBgn0011854	tRNA:E4:62Ad	0	0	0	0	0	0.519146	0	0	0	0	0	0	NA
FBtr0072691	FBgn0011855	tRNA:E4:62Ae	0	0	0	0	0	0.519146	0	0	0	0	0	0	NA
FBtr0072692	FBgn0035216	CG9168	0	0	0	0	0	0	0	0	0	0	0	0	NA
FBtr0072693	FBgn0035217	FucTD	0	0	0	0	0	0	0	0	0	0	0	0	NA
FBtr0072694	FBgn0004635	rho	0.119607	0.175002	0.0419947	0.0638024	0.130823	0.33354	0.200711	0.317582	0.152957	0.0986875	0.293218	0.524914	0.541702
FBtr0072695	FBgn0028567	robl62A	0	0.430253	0.332459	0	0	0	0.299261	0.556832	0.284927	0	0.833002	0.249606	NA
FBtr0072697	FBgn0261243	Psa	0.385866	1.48846	1.75833	1.37324	2.48285	0.720187	0	0.633595	0.915005	1.79116	1.72349	0.334947	0.918434
FBtr0072698	FBgn0261243	Psa	0	0.515368	0	0	0	0	0.547842	0	0	0	0	0	NA
FBtr0072699	FBgn0261243	Psa	0.479544	1.20733	0.230669	0.94242	0.88553	0.47526	0.704661	0.597632	0.617494	0.231156	1.35037	1.5067	0.754879
FBtr0072700	FBgn0261243	Psa	0.391166	0.856207	0.412287	1.50463	0	0	1.56015	0.354952	0.379616	0	1.2173	0.796636	0.603831
FBtr0072701	FBgn0261243	Psa	5.12316	5.30731	5.306	7.26038	8.89524	7.79973	6.25396	3.73896	7.24106	4.10612	6.44271	7.31526	0.569511
FBtr0072702	FBgn0261243	Psa	3.58e-08	0	0	0	0	0	0	0	0	0	0	0	NA
FBtr0072703	FBgn0035227	CG12090	0	0	0	0	0	0	0	0	0	0	0	0	NA
FBtr0072704	FBgn0035227	CG12090	13.9154	15.4166	17.7589	18.324	17.1186	16.8261	17.8298	17.9903	15.5178	17.0225	20.1186	16.9003	0.428616
FBtr0072705	FBgn0035227	CG12090	0.186068	0	0	0	0.832809	0.562097	0	0.176428	0.226328	0	0.421852	0.409649	0.526395
FBtr0072706	FBgn0011204	cue	233.043	247.735	251.867	248.982	227.749	244.315	251.329	247.657	235.133	222.029	276.767	270.536	0.484228
FBtr0072707	FBgn0028577	pUf68	0	0.660885	0.00145881	0	0.337464	0.508909	2.67e-08	0.193816	0	0	0.00131128	0	NA
FBtr0072708	FBgn0028577	pUf68	0	0	0.166221	0.539953	0.219864	0.298708	0	0	0	0	0.239018	0.142082	0.4866
FBtr0072709	FBgn0028577	pUf68	119.036	126.668	106.605	122.046	127.918	125.514	111.835	105.962	107.094	116.597	147.699	139.289	0.386695
FBtr0072710	FBgn0028577	pUf68	0.566909	0.728064	0.964919	0.317239	0.402732	0	0.502014	1.07218	0.530021	1.19194	1.14897	0.988726	1
FBtr0072711	FBgn0043458	CG12084	57.0813	57.0488	58.6312	55.778	55.7056	51.3342	57.2396	49.6826	48.6262	52.6518	59.7001	71.5082	1
FBtr0072712	FBgn0020248	stet	0.141999	0.0779684	0.0749398	0.0749459	0.373951	0.385109	0.490005	0.0674662	0.470885	0.207241	0.0740249	0.292309	0.629114
FBtr0072713	FBgn0020248	stet	139.388	149.976	146.527	117.413	137.124	115.71	131.25	137.428	124.701	136.794	103.114	115.289	0.190117
[truncated: 32,751 more rows]
