# Supplementary material
Source: publisher figshare collection journal article supplement (https://gsajournals.figshare.com/articles/dataset/_/6143183)
Supplement: Supplementary file 1 [file 1]

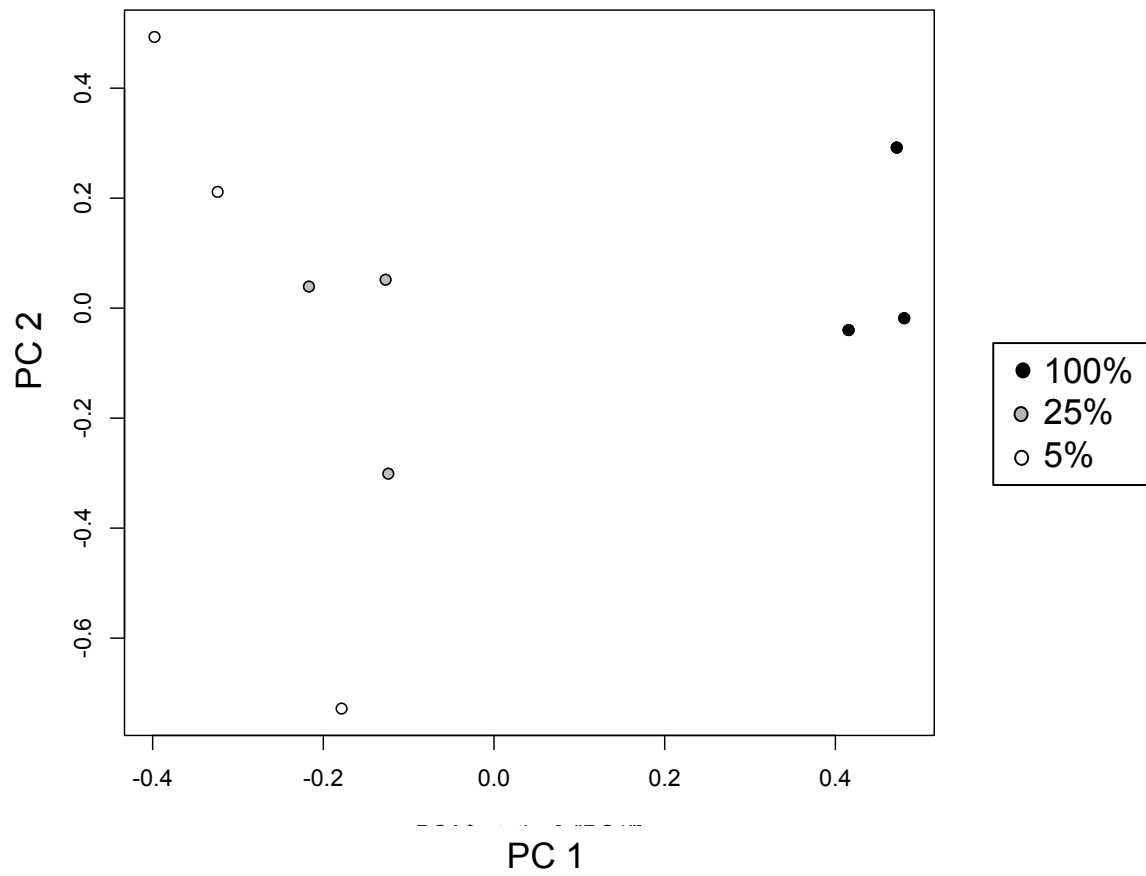

**Figure S1. PCA on the differentially expressed genes.** The color of the points indicates the food percentage given to mothers of these eggs during larval stage. The samples from eggs whose mothers had a standard diet (100%) cluster together, while the samples from eggs whose mothers were nutritionally limited (25% or 5% food) cluster together. In this analysis, limited to genes called by Sleuth as differentially expressed, PC 1 explains 81% of the variance, while PC 2 explains 6%.
