# Supplementary material
Source: publisher figshare collection journal article supplement (https://gsajournals.figshare.com/articles/dataset/_/6143183)
Supplement: Supplementary file 2 [file 1]

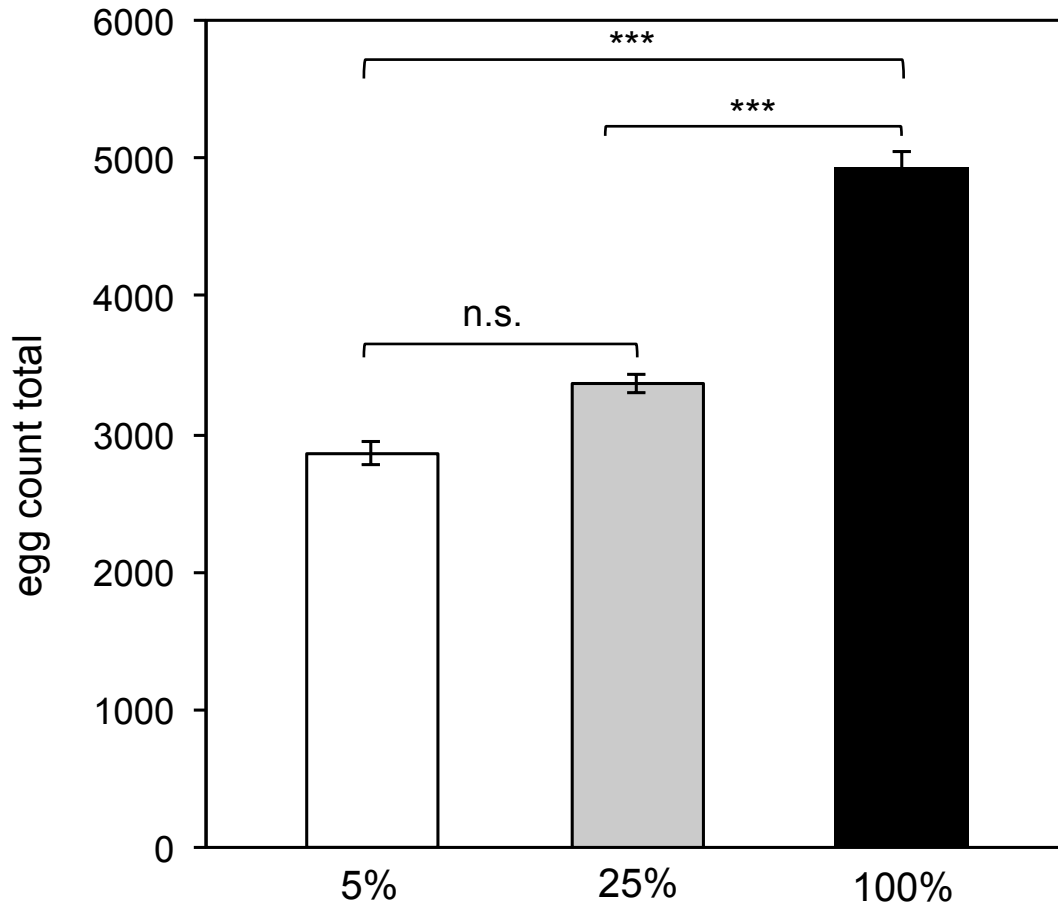

**Figure S2. Effect of nutrition limitation on fecundity.** Mean total egg counts from flies raised on 100%, 25% and 5% food, for 12 days, over three replicates. Significant differences (\*\*\*) were found between egg production from parents raised on 100% food vs. both of the two limited nutrition treatments (Wilcoxon test, 5%-100%  $p=4.22 \times 10^{-4}$ , 25%-100%  $p=4.06 \times 10^{-4}$ ), but not between the two limited nutrition treatments (5%-25%,  $p=0.21$ ).
